# Supplementary material
Source: PubMed Central journal article supplement (PMC546175)
Supplement: nar_33_1_e6__1.pdf [file nar_33_1_e6__1.pdf]

**Annex 1:** Potential donors for every RNA-free atypical region in 22 species (position of atypical region, distance donor/atypical region, P=plasmid, M=mitochondrion, A= rRNA)

***Aeropyrum pernix***

|                                         |                                       |                                       |
|-----------------------------------------|---------------------------------------|---------------------------------------|
| 2250-8750                               | 67250-70250                           | 262250-263250                         |
| 180 <i>Salmo salar</i> -M               | 207 <i>Neurospora crassa</i>          | 275* <i>Aeropyrum pernix</i>          |
| 184 <i>Oncorhynchus mykiss</i> -M       | 213 <i>Aspergillus fumigatus</i>      | 284750-293750                         |
| 184 <i>Salvelinus alpinus</i> -M        | 218 <i>Chlamydia suis</i>             | 155 <i>Pyrococcus abyssi</i>          |
| 185 <i>Engraulis japonicus</i> -M       | 219 <i>Candidatus Kuenenia</i>        | 158 <i>Hyaloraphidium curvatum</i>    |
| 188 <i>Dromaius novaehollandiae</i> -M  | <i>stuttgartiensis</i> -A             | 158 <i>Hyaloraphidium curvatum</i> -M |
| 16250-21250                             | 221 <i>Giardia lamblia</i> ATCC 50803 | 181 <i>Pyrococcus horikoshii</i>      |
| 184 <i>Balanoglossus carnosus</i> -M    | 190250-193250                         | 194 <i>Salmo salar</i> -M             |
| 207 <i>Rhea americana</i> -M            | 205 <i>Salmo salar</i> -M             | 298250-301750                         |
| 209 <i>Pyrococcus abyssi</i>            | 206 <i>Engraulis japonicus</i> -M     | 256* <i>Pyrodictium occultum</i>      |
| 210 <i>Pterocnemia pennata</i> -M       | 208 <i>Salvelinus alpinus</i> -M      | 312750-313750                         |
| 210 <i>Enterococcus dispar</i>          | 208 <i>Sardinops melanostictus</i> -M | 231 <i>Pyrodictium occultum</i>       |
| 31250-31750                             | 208 <i>Arctoscopus japonicus</i> -M   | 247* <i>Aeropyrum pernix</i>          |
| 324* <i>Thermococcus hydrothermalis</i> | 198750-206250                         | 322250-322750                         |
| 32250-32750                             | 184 <i>Salmo salar</i> -M             | 384* <i>Pyrodictium occultum</i>      |
| 344* <i>Giardia lamblia</i> ATCC 50803  | 185 <i>Eudromia elegans</i> -M        | 327250-328250                         |
| 33750-35250                             | 186 <i>Hyaloraphidium curvatum</i>    | 251* <i>Diplophos taenia</i> -M       |
| 250* <i>Aeropyrum pernix</i>            | 186 <i>Hyaloraphidium curvatum</i> -M | 371250-373750                         |
| 35750-36250                             | 188 <i>Struthio camelus</i>           | 258* <i>Aeropyrum pernix</i>          |
| 363* <i>Ehrlichia ovina</i> -A          | 209250-209750                         | 377250-393250                         |
| 36750-39750                             | 346* <i>Rhea americana</i> -M         | 286* <i>Pyrodictium occultum</i>      |
| 238* <i>Desulfurococcus mucosus</i>     | 211250-212250                         | 404250-406250                         |
| 57750-63750                             | 240* <i>Salmo salar</i> -M            | 260* <i>Aeropyrum pernix</i>          |
| 193 <i>Balanoglossus carnosus</i> -M    | 215750-222750                         | 416250-425750                         |
| 203 <i>Salmo salar</i> -M               | 176 <i>Salmo salar</i> -M             | 270* <i>Aeropyrum pernix</i>          |
| 206 <i>Candidatus Kuenenia</i>          | 179 <i>Struthio camelus</i>           | 433750-434250                         |
| <i>stuttgartiensis</i> -A               | 179 <i>Hyaloraphidium curvatum</i>    | 330* <i>Aeropyrum pernix</i>          |
| 206 <i>Arctoscopus japonicus</i> -M     | 179 <i>Hyaloraphidium curvatum</i> -M | 441750-446750                         |
| 207 <i>Nothoprocta ornata</i> -A        | 183 <i>Oncorhynchus mykiss</i> -M     | 222 <i>Aeropyrum pernix</i>           |

223 *Pyrodictium occultum*  
256\* *Desulfurococcus mobilis*  
523250-524250  
284\* *Podospora anserina*  
526250-527750  
242\* *Desulfurococcus mucosus*  
546250-549250  
192 *Hyaloraphidium curvatum*  
192 *Hyaloraphidium curvatum-M*  
194 *Struthio camelus*  
199 *Ehrlichia* sp HGE agent  
203 *Salmo salar-M*  
552750-553250  
377\* *Aeropyrum pernix*  
554750-563750  
226 *Pyrodictium occultum*  
243\* *Aeropyrum pernix*  
569750-576750  
190 *Giardia lamblia* ATCC 50803  
200 *Archaeoglobus fulgidus*  
205 *Neurospora crassa*  
206 *Avian sarcoma virus*  
206 *Emericella nidulans*  
649250-660250  
267\* *Pyrodictium occultum*  
660750-669250  
272\* *Aeropyrum pernix*  
675750-726750  
225 *Pyrodictium occultum*  
237\* *Aeropyrum pernix*  
729250-748750  
138 *Sulfolobus acidocaldarius*  
152 *Sulfolobus solfataricus*  
154 *Lumbricus terrestris-M*

162 *Sulfolobus* NOB8H2 plpNOB8-P  
754250-756250  
268\* *Caldococcus noboribetus*  
759750-762250  
200 *Rhea americana-M*  
206 *Pterocnemia pennata-M*  
212 *Balanoglossus carnosus-M*  
214 *Oncorhynchus mykiss-M*  
216 *Salmo salar-M*  
765250-770750  
291\* *Pyrodictium occultum*  
779250-779750  
346\* *Ehrlichia* sp HGE agent  
780250-782250  
237\* *Aeropyrum pernix*  
784250-789750  
293\* *Plecoglossus altivelis-M*  
791750-793250  
237\* *Aeropyrum pernix*  
794250-794750  
421\* *Aeropyrum pernix*  
795250-796250  
283\* *Pyrodictium occultum*  
800750-803750  
254\* *Pyrodictium occultum*  
841750-842250  
340\* *Pyrodictium abyssii*  
843250-848750  
226 *Pyrodictium occultum*  
242\* *Aeropyrum pernix*  
980250-980750  
315\* *Pyrodictium occultum*  
983250-985750  
180 *Sulfolobus solfataricus*

189 *Sulfolobus* NOB8H2 plpNOB8-P  
192 *Lumbricus terrestris-M*  
193 *Sulfolobus acidocaldarius*  
1087250-1088750  
220 *Sardinops melanostictus-M*  
220 *Balanoglossus carnosus-M*  
225 *Pterocnemia pennata-M*  
227 *Plecoglossus altivelis-M*  
228 *Rhea americana-M*  
1120750-1122250  
229 *Aeropyrum pernix*  
254\* *Desulfurococcus mucosus*  
1264250-1264750  
338\* *Aeropyrum pernix*  
1350250-1350750  
322\* *Aeropyrum pernix*  
1351750-1352750  
263\* *Coregonus lavaretus-M*  
1356250-1356750  
354\* *Aeropyrum pernix*  
1408250-1408750  
383\* *Aeropyrum pernix*  
1410250-1415250  
258\* *Pyrodictium occultum*  
1418750-1420250  
226 *Balanoglossus carnosus-M*  
233 *Pyrococcus abyssii*  
238\* *Sardinops melanostictus-M*  
1446750-1447750  
284\* *Aeropyrum pernix*  
1503250-1508250  
289\* *Aeropyrum pernix*  
1631250-1632750  
251\* *Cochliobolus homomorphus*

1666250-1667250

*Aquifex aeolicus*

31250-31750

329\* *Aquifex aeolicus* pece1-P

218750-223250

192 *Aquifex aeolicus* pece1-P

240\* *Marinococcus halophilus*

247750-248250

323\* *Aquifex aeolicus*

249750-264250

194 *Pneumocystis carinii*

201 *Leptospira interrogans*

205 *Lactobacillus lactis* pl-P

205 *Lactococcus lactis* pK214-P

209 *Bacillus anthracis* pXO2-P

268250-269750

245\* *Aquifex aeolicus*

341250-354750

202 *Bacillus mycoides* pBMY1-P

205 *T thermohydrosulfuricus*

206 *Leptospira interrogans*

207 *Nephroselmis olivacea*-M

207 *Lactococcus lactis* pK214-P

398750-399250

376\* *Aquifex aeolicus*

428250-431750

271\* *Aquifex aeolicus* pece1-P

440250-445250

208 *Leptospira interrogans*

209 *Aquifex aeolicus* pece1-P

235\* *Marinococcus halophilus*

697250-697750

259\* *Sulfolobus metallicus*

379\* *Aquifex aeolicus*

714250-719750

189 *Arbacia lixula*-M

194 *Acidianus ambivalens*

199 *Asterina pectinifera*-M

202 *Sulfolobus shibatae*

205 *Pylaiella littoralis*-M

722750-724250

214 *Thermococcus litoralis*

218 *Chlamydomphila pneumoniae*

220 *Beta vulgaris*-M

228 *Pyrococcus horikoshii*

228 *Pyrococcus furiosus*

725750-728750

193 *T thermohydrosulfuricus*

196 *Bacillus anthracis* pXO2-P

199 *Bacillus anthracis* pPX01-P

200 *Lactobacillus lactis* pl-P

200 *Lactococcus lactis* pK214-P

746750-752250

201 *Clostridium histolyticum*

207 *Clostridium acetobutylicum*

210 *T thermohydrosulfuricus*

216 *Lactococcus lactis* pSRQ900-P

217 *Bacillus anthracis* pPX01-P

762750-768250

187 *Bacillus anthracis* pXO2-P

188 *Listeria ivanovii*

194 *Porphyra purpurea*-M

198 *Bacillus anthracis* pPX01-P

199 *Lactococcus lactis* pSRQ700-P

834250-837750

224 *Aquifex aeolicus* pece1-P

241\* *Aquifex aeolicus*

932750-933250

300\* *Aquifex pyrophilus*

933750-935750

246\* *Hydrogenobacter thermophilus*

980250-980750

340\* *Wheat yellow mosaic virus-A*

981750-982250

370\* *Aquifex aeolicus*

1020750-1022750

235\* *Bacteroides fragilis*

1065750-1067250

239\* *Aquifex aeolicus*

1067750-1069750

228 *Aquifex aeolicus* pece1-P

270\* *Aquifex aeolicus*

1310250-1313750

188 *Chlamydomphila caviae*

199 *Asterina pectinifera*-M

201 *Chlamydia psittaci* phage chp1

203 *Acidianus ambivalens* pDL10-P

204 *Holospira obtusa*

1445250-1449250

238\* *Aquifex aeolicus* pece1-P

1538250-1542750

208 *Aquifex aeolicus*

212 *Strongylocentrotus purpuratus*

213 *Fusobacterium nucleatum*

214 *Chlamydomorpha abortus*

217 *Sarcocystis capracanis-A*

**Archaeoglobus fulgidus**

2250-5250

314\* Apple stem grooving virus

40250-54750

162 *Chlamydia trachomatis*

171 *C pneumoniae* J138

171 *Chlamydomorpha pneumoniae* AR39

171 *Chlamydia pneumoniae* TW-183

176 *Chlamydia muridarum*

64750-71750

140 *Streptococcus pneumoniae*

141 *Streptococcus pneumoniae* R6

147 *Streptococcus mitis*

148 *Streptococcus gordonii*

148 *Thermococcus litoralis*

92250-96750

154 *Aedes aegypti*

160 *Staphylococcus capitis*

160 *Chlamydia muridarum*

162 *Phlebotomus papatasi*

162 *Enterococcus faecium*

167750-168750

271\* *Sorghum bicolor*

268250-290750

126 *Chlamydia muridarum*

127 *Chlamydia pneumoniae* J138

127 *Chlamydomorpha pneumoniae* AR39

127 *Chlamydia pneumoniae* TW-183

136 *Chlamydia trachomatis*

397250-403250

282\* Apple stem grooving virus

426250-426750

310\* Bacteriophage H-19B

479750-483250

181 *Marchantia polymorpha-M*

193 Bacteriophage phi-105

195 *Ipomoea purpurea*

200 *Treponema denticola*

200 *Oryza sativa*

536750-557750

143 *Chlamydia muridarum*

150 *Chlamydia pneumoniae* J138

150 *Chlamydomorpha pneumoniae* AR39

150 *Chlamydia pneumoniae* TW-183

153 *Chlamydomorpha caviae*

678250-682750

152 Turnip vein-clearing virus

160 *Branchiostoma floridae*

160 *Uromyces aemulus*

163 *Physcomitrella patens*

163 Crucifer tobamovirus

688250-692250

166 *Chlamydia muridarum*

167 *Bacillus megaterium*

169 *Coxiella burnetii* pQpH1-P

170 *Chlamydomorpha pneumoniae* AR39

170 *Chlamydia pneumoniae* TW-183

799750-804250

143 *Chlamydia muridarum*

145 *Linum usitatissimum*

146 *Beta vulgaris*

147 *Chlamydomorpha pneumoniae* AR39

147 *Chlamydia pneumoniae* TW-183

844750-848750

180 Ribgrass mosaic virus

182 *Echinococcus granulosus*

185 Crucifer tobamovirus

186 Chinese wheat mosaic virus-A

187 Turnip vein-clearing virus

867750-868750

247\* *Cochliobolus kusanoi*

908250-908750

376\* *Pyrococcus abyssi*

909750-911750

174 *Chlamydia muridarum*

177 *Chlamydia pneumoniae* J138

177 *Chlamydomorpha pneumoniae* AR39

178 *Chlamydia pneumoniae* TW-183

179 *Chlamydia trachomatis*

935750-939750

256\* *Archaeoglobus fulgidus*

975750-983250

202 *Chlamydia muridarum*

204 *Chlamydia* phage 2

206 *Chlamydia pneumoniae* J138

206 *Chlamydomorpha pneumoniae* AR39

206 *Chlamydia pneumoniae* TW-183

1173750-1179250

147 *Lotus japonicus* Chr3

150 *Nicotiana tabacum*

151 *Lotus japonicus* Chr1

154 *Lotus japonicus* Chr6  
 154 *Nicotiana sylvestris*  
 1256250-1260750  
 197 *Thermococcus litoralis*  
 200 *Chlamydia muridarum*  
 201 *Methanosarcina barkeri*  
 201 *Chlamydia trachomatis*  
 206 *Chlamydophila pneumoniae* AR39  
 1269750-1271750  
 215 *Echinococcus granulosus*  
 215 Garlic virus B  
 216 *Physcomitrella patens*  
 220 *Lentinula edodes*  
 223 *Mesostoma lingua*  
 1334750-1339250  
 173 *Thermococcus litoralis*  
 191 *Archaeoglobus fulgidus*  
 195 *Methanosarcina barkeri*  
 209 *Pyrococcus furiosus*  
 211 *Chlamydophila pneumoniae* AR39  
 1401250-1404750  
 278\* *Archaeoglobus fulgidus*  
 1409750-1415750  
 154 *Chlamydophila abortus*  
 164 *Trypanosoma brucei*  
 167 *Aedes aegypti*  
 167 *Trypanosoma brucei*  
 168 *Sorghum bicolor*  
 1421750-1423750

***Bacillus subtilis***

118250-121750  
 207 *Streptococcus bovis*

181 *Methanosarcina barkeri*  
 199 *Eubacterium acidaminophilum*  
 201 *Chlamydophila pneumoniae* AR39  
 202 *Streptococcus gordonii*  
 206 *Chlamydia trachomatis*  
 1460750-1464250  
 145 *Thermococcus litoralis*  
 157 *Pyrococcus furiosus*  
 162 *Chlamydophila pneumoniae* AR39  
 176 *Chlamydia trachomatis*  
 178 *Chlamydia muridarum*  
 1508250-1509250  
 230 *Fusobacterium equinum*  
 239\* *Toxoplasma gondii*  
 1530750-1536250  
 193 *Thermococcus litoralis*  
 195 *Pyrococcus furiosus*  
 201 *Chlamydia muridarum*  
 202 *Chlamydophila pneumoniae* AR39  
 202 *Chlamydia pneumoniae* TW-183  
 1638750-1641750  
 203 *Cochliobolus kusanoi*  
 205 *Stagonospora arenaria*  
 207 *Pyrenopeziza brassicae*  
 207 *Gracilaria gracilis*  
 211 *Trichoderma aggressivum*  
 1671750-1682750  
 153 *Chlamydophila pneumoniae* AR39  
 153 *Chlamydia pneumoniae* TW-183

213 *Bacillus megaterium*  
 214 *Streptococcus dysgalactiae*

153 *Chlamydia pneumoniae* J138  
 154 *Chlamydia muridarum*  
 154 *Thermococcus litoralis*  
 1689250-1695250  
 303\* *Archaeoglobus fulgidus*  
 1748750-1750250  
 236\* *Mesotaenium caldariorum*  
 1878250-1881250  
 219 Artichoke mottled crinkle virus  
 220 Cryphonectria hypovirus 3  
 222 *Archaeoglobus fulgidus*  
 224 Beet chlorosis virus  
 224 Potato leaf curl virus  
 1910250-1910750  
 318\* *Fusobacterium nucleatum*  
 1919750-1920750  
 263\* *Bacillus macroides*  
 1977250-1980250  
 175 *Microcystis aeruginosa*  
 176 *Chlamydia muridarum*  
 178 *Bacillus megaterium*  
 181 *Linum usitatissimum*  
 183 *Cucurbita pepo*  
 2087750-2106250  
 173 *Thermococcus litoralis*  
 175 *Chlamydia pneumoniae* J138  
 177 *Chlamydia trachomatis*  
 180 *Chlamydophila pneumoniae* AR39  
 180 *Chlamydia pneumoniae* TW-183

217 *Streptococcus equisimilis*  
 227 *Lactococcus lactis* pH003-P

|                                        |                                            |                                        |
|----------------------------------------|--------------------------------------------|----------------------------------------|
| 123750-144750                          | 86 <i>Schizosaccharomyces pombe</i>        | 148 Turkey adenovirus 3                |
| 150 <i>Enterococcus asini</i>          | 90 <i>Listeria innocua</i> pLI100-P        | 1144750-1145750                        |
| 154 <i>Bacillus</i> sp. C-125-A        | 97 Bacteriophage PSA                       | 349* <i>Pantoea citrea</i> pUCD5000-P  |
| 154 <i>Vibrio harveyi</i>              | 100 Bacteriophage SPBc2                    | 1262250-1270250                        |
| 158 <i>Bacillus pseudofirmus</i>       | 104 Bacteriophage bIL285                   | 97 Bacteriophage SPBc2                 |
| 166 <i>Streptococcus bovis</i>         | 652250-664250                              | 99 <i>Schizosaccharomyces pombe</i>    |
| 203250-207750                          | 94 <i>Listeria innocua</i> pLI100-P        | 99 <i>Listeria innocua</i> pLI100-P    |
| 136 <i>Enterococcus faecium</i>        | 104 <i>Streptococcus thermophilus</i>      | 106 <i>Onchocerca volvulus</i>         |
| 140 <i>Bacillus mojavensis</i>         | 104 <i>Bacillus anthracis</i>              | 107 Bacteriophage PSA                  |
| 143 <i>Vibrio adaptatus</i>            | 104 Bacteriophage SPBc2                    | 1277750-1278750                        |
| 148 <i>Legionella longbeachae</i>      | 106 <i>Schizosaccharomyces pombe</i>       | 212 <i>Bacillus pumilus</i> pPL10-P    |
| 149 <i>Streptococcus uberis</i>        | 738750-747250                              | 228 <i>Arabidopsis thaliana</i>        |
| 209250-209750                          | 112 Bacteriophage SPBc2                    | 231 <i>Brassica napus</i>              |
| 297* <i>Clostridium cellulolyticum</i> | 121 <i>Streptococcus agalactiae</i>        | 232 <i>Arabidopsis lyrata</i>          |
| 211250-218750                          | 121 <i>Bacillus anthracis</i> pXO2-P       | 233 <i>Schizosaccharomyces pombe</i>   |
| 105 <i>Enterococcus faecium</i>        | 122 <i>S aureus</i> prophage phiPV83       | 1280250-1280750                        |
| 116 <i>Saccharomyces pastorianus</i>   | 124 <i>Listeria innocua</i> pLI100-P       | 344* <i>Fagopyrum esculentum</i>       |
| 118 <i>Streptococcus suis</i>          | 769750-777250                              | 1441750-1447250                        |
| 119 <i>Saccharomyces cerevisiae</i>    | 175 <i>Bacillus licheniformis</i>          | 119 <i>Bacillus megaterium</i>         |
| narnavirus                             | 176 <i>Chlorobium limicola</i> pCL1-P      | 124 <i>Bacillus cereus</i>             |
| 124 <i>Legionella pneumophila</i>      | 180 <i>Bacillus circulans</i>              | 125 <i>Bacillus mojavensis</i>         |
| 379750-387750                          | 188 <i>Bacillus thermoleovorans</i>        | 128 <i>Staphylococcus intermedius</i>  |
| 188 <i>Bacillus licheniformis</i>      | 189 <i>S typhimurium</i> pSC101-P          | 129 <i>Schizosaccharomyces pombe</i>   |
| 197 <i>Brevibacillus brevis</i>        | 818250-822250                              | 1478250-1483250                        |
| 198 <i>Paenibacillus abekawaensis</i>  | 146 <i>Bacillus anthracis</i> pPX01-P      | 117 Bacteriophage SPBc2                |
| 202 Bacteriophage HK97                 | 154 <i>Cyanidium caldarium</i> chloroplast | 117 <i>Bacillus cereus</i>             |
| 204 <i>Bacillus</i> sp. BP23           | 160 <i>Nephroselmis olivacea</i> -M        | 119 <i>Bacillus mojavensis</i>         |
| 392750-398750                          | 160 <i>Prochlorococcus marinus</i>         | 121 <i>Bacillus anthracis</i>          |
| 167 <i>Bacillus licheniformis</i>      | 160 <i>Bacillus anthracis</i> pXO2-P       | 124 <i>Schizosaccharomyces pombe</i>   |
| 191 <i>Bacillus circulans</i>          | 1125750-1129250                            | 1529750-1530250                        |
| 196 <i>Paenibacillus abekawaensis</i>  | 138 Bacteriophage SPBc2                    | 332* <i>Tetragenococcus halophilus</i> |
| 204 <i>Brevibacillus brevis</i>        | 140 <i>Schizosaccharomyces pombe</i>       | 1878750-1893250                        |
| 207 <i>Heliobacillus mobilis</i> -A    | 144 <i>Bacillus cereus</i>                 | 93 Bacteriophage SPBc2                 |
| 528750-567750                          | 144 <i>S aureus</i> phage phi 12           | 106 <i>Listeria innocua</i> pLI100-P   |

110 *Bacillus cereus*  
110 *Bacillus anthracis*  
111 *Legionella longbeachae*  
1897750-1905250  
133 *Listeria innocua* pLI100-P  
135 *Schizosaccharomyces pombe*  
136 *Bacillus mojavensis*  
141 African swine fever virus  
142 Bacteriophage PSA  
1923250-1924250  
193 *Bacillus subtilis* pTA1060-P  
206 *Bacillus subtilis* pTA1040-P  
209 *Bacillus subtilis* p1414-P  
210 *Bacillus pumilus* pPL10-P  
217 *Coxiella burnetii* pQpH1-P  
1939250-1939750  
314\* *Ciona intestinalis*  
1977750-1978250  
358\* *Paenibacillus macerans*  
2029250-2029750  
331\* Commelina yellow mottle virus  
2033750-2034750  
211 *A actinomycetemcomitans*  
pVT745-P  
215 *A actinomycetemcomitans*  
218 *Enterococcus faecalis*  
218 *Bacillus subtilis* pTA1060-P  
219 *Bacillus pumilus* pPL10-P  
2036250-2042250  
121 *Enterococcus faecium*  
138 *S cerevisiae* narnavirus  
138 *Enterococcus faecalis*  
144 *Saccharomyces pastorianus*  
144 *Bacillus megaterium*

2047250-2075250  
75 Bacteriophage SPBc2  
79 *Listeria innocua* pLI100-P  
97 *Schizosaccharomyces pombe*  
98 *Bacillus anthracis*  
101 *Streptococcus agalactiae*  
2097250-2097750  
360\* Bacteriophage phi-105  
2150750-2285750  
2 Bacteriophage SPBc2  
94 *Schizosaccharomyces pombe*  
98 *Streptococcus thermophilus*  
101 *Listeria innocua* pLI100-P  
102 *S aureus* phage phi 12  
2552750-2553750  
235\* *Bacillus subtilis*  
2585250-2586250  
240\* *Bacteroides fragilis*  
2653750-2667250  
94 *Schizosaccharomyces pombe*  
98 *Bacillus megaterium*  
99 Bacteriophage SPBc2  
102 *Bacillus mojavensis*  
104 *Listeria innocua* pLI100-P  
2675250-2676250  
234 *Bacillus pseudofirmus*  
236\* *Methanosarcina barkeri*  
2683750-2693750  
124 *S cerevisiae* narnavirus  
126 *Enterococcus faecium*  
136 *Enterococcus hirae*  
139 *Bacillus megaterium*  
139 Streptococcaceae Streptococcus  
2696250-2701250

138 *Bacillus megaterium*  
141 *Schizosaccharomyces pombe*  
145 *Streptococcus mutans*  
146 *Bacillus pumilus* pPL10-P  
147 *Enterococcus faecium*  
2705750-2740250  
96 *Listeria innocua* pLI100-P  
99 *Schizosaccharomyces pombe*  
103 Bacteriophage SPBc2  
104 *Bacillus mojavensis*  
110 *Legionella longbeachae*  
2742250-2746750  
124 *Enterococcus faecium*  
145 *Bacteroides fragilis*  
149 *Streptococcus suis*  
149 *Butyrivibrio fibrisolvens*  
150 *Legionella pneumophila*  
2765750-2768250  
170 *A actinomycetemcomitans*  
177 *Coxiella burnetii*  
177 *Haemophilus influenzae*  
180 *A actinomycetemcomitans*  
pVT745-P  
181 *Legionella pneumophila*  
3252750-3257250  
123 *Bacillus anthracis*  
134 *Listeria innocua* pLI100-P  
136 *Bacillus anthracis* pXO2-P  
140 Bacteriophage SPBc2  
140 *Bacillus anthracis* pPX01-P  
3281250-3285750  
194 *Paenibacillus abekawaensis*  
199 Bacteriophage HK97  
202 *C glutamicum* pCG4-P

203 Bacteriophage HK022  
205 *Bacillus* sp. BP23  
3337250-3337750  
346\* *Erwinia amylovora* pEA29-P  
3462250-3467250  
143 *Bacillus anthracis* pPX01-P  
148 *Lactococcus lactis* pNZ4000-P  
151 *Cucumis sativus*  
152 *Anthonomus grandis*  
153 *Carnobacterium alterfunditum*  
3658750-3661750  
161 *Streptococcus intermedius*  
169 Bacteriophage Tuc2009  
171 *Gardnerella vaginalis*  
172 *Tetragenococcus halophilus*  
175 *Enterococcus faecium*  
3663750-3683750

### ***Borrelia burgdorferi***

299750-301750  
255\* *Chlamydia muridarum* pMoPn-P  
398750-404250  
161 Bacteriophage SPBc2  
174 *Euplotes octocarinatus*  
176 *Borrelia hermsii*

### ***Campylobacter jejuni***

275250-276250  
374\* *Campylobacter jejuni* pCJ01-P  
276750-277250  
450\* *Dictyostelium discoideum*  
378250-378750

103 *Lactococcus lactis* pNZ4000-P  
109 *Lactobacillus lactis* pl-P  
109 *Lactococcus lactis* pK214-P  
115 *Lactococcus lactis* pAH82-P  
116 *Bacillus anthracis* pXO2-P  
3712250-3716750  
189 *Bacillus subtilis* pTA1060-P  
191 *Bacillus pumilus* pPL10-P  
196 *Bacillus subtilis* pTA1040-P  
204 Plasmid pUB110-P  
204 *Staphylococcus aureus* pUB110-P  
4019750-4020250  
316\* *Bacillus* sp. RC607  
4122750-4134250  
96 *Bacillus anthracis* pPX01-P  
115 *Bacillus anthracis* pXO2-P  
116 *Bacillus anthracis*

176 *Stylonychia lemnae*  
180 *Streptococcus mutans*  
445750-446250  
300\* *Hepatozoon catesbiana*-A  
498250-498750  
308\* Rice tungro bacilliform virus

275\* *Campylobacter jejuni*  
499250-499750  
374\* African swine fever virus  
808250-808750  
311\* *Campylobacter jejuni*

127 Bacteriophage bIL312  
128 *Cucumis sativus*  
4171250-4176750  
117 *Bacillus anthracis* pPX01-P  
122 *C acetobutylicum* pSOL1-P  
128 *Staphylococcus hominis*  
133 *Porphyra purpurea*-M  
133 *Brochothrix campestris*  
4183750-4189250  
122 *Listeria innocua* pLI100-P  
134 *S cerevisiae* narnavirus  
134 *Streptococcus thermophilus*  
135 *Schizosaccharomyces pombe*  
137 Bacteriophage SPBc2

666750-667250  
296\* *Mycoplasma incognitus*  
668750-669750  
284\* *Guillardia theta*  
907250-907750  
337\* *Borrelia burgdorferi* plp36-P

906750-908750  
201 *Clostridium acetobutylicum*  
205 *C acetobutylicum* pSOL1-P  
213 *Staphylococcus aureus* pJ3358-P  
214 *Cyanidium caldarium* chloroplast



218 *S aureus* phage phi 12  
1072750-1073750  
245\* *Borrelia burgdorferi* plp25-P  
1074250-1075750  
245\* Lumpy skin disease virus  
1268250-1270250

250\* *Mycoplasma synoviae*  
1365750-1366250  
328\* *Buchnera* sp APS pTrp-P  
1373250-1379750  
158 *Borrelia burgdorferi* plp38-P  
166 *Borrelia burgdorferi* plp28-3-P

168 *Plasmodium yoelii*  
169 *Plasmodium chabaudi*  
172 *Borrelia burgdorferi* pcp26-P  
1617750-1618250  
351\* *Mycoplasma agalactiae*

### ***Chlamydomydia pneumoniae* AR39**

12750-13250  
320\* *Chlamydia trachomatis*  
57750-59750  
204 *Chlamydia pneumoniae* TW-183  
206 *Chlamydia pneumoniae* J138  
206 *Chlamydomydia pneumoniae* AR39  
206 *Chlamydia muridarum*  
208 *Chlamydia trachomatis*  
207250-207750  
313\* *Sulfolobus islandicus* pHEN7-P  
289750-292250  
154 *Nicotiana tabacum*  
157 *Bacillus thuringiensis*  
161 *Clostridium butyricum*

161 *Daucus carota*  
164 *Petunia axillaris*  
394750-395250  
309\* *Hyaloraphidium curvatum*-M  
491750-494750  
153 *Chlamydia pneumoniae* J138  
194 *Ehrlichia* sp HGE agent  
195 *Chlamydomydia abortus*  
201 *Pyrococcus woesei*  
203 *Thermococcus litoralis*  
497250-497750  
291\* *Beta vulgaris*-M  
515750-516750  
214 *Chlamydia pneumoniae* TW-183

228 *Chlamydia psittaci*  
233 *Chlamydia pneumoniae* J138  
233 *Chlamydomydia pneumoniae* AR39  
233 *Chlamydia muridarum*  
546750-547250  
346\* Australian bat lyssavirus  
623250-624250  
262\* *Gallus gallus*  
899750-900250  
363\* *Rana catesbeiana*  
901750-902250  
329\* Sendai virus  
916250-916750  
296\* *Malonomonas rubra*

### ***Chlamydia trachomatis***

55750-57250  
248\* Bovine immunodeficiency virus  
167250-167750  
381\* *Brassica montana*  
194750-195750  
241\* *Lactococcus lactis* pAH82-P  
196250-198250  
210 *Chlamydia muridarum* pMoPn-P

219 *Chlamydia trachomatis* pl-P  
220 *Lactococcus lactis* pSRQ700-P  
221 *Chlamydia trachomatis* pCHL1-P  
222 Bovine adenovirus 4  
253750-254250  
318\* *Dendrobium greg*  
352250-353750  
231 *Streptococcus mitis*

232 *Pichia pastoris*  
232 *Sesamum indicum*  
235\* *Blumeria graminis*  
476750-477250  
381\* *Encephalitozoon cuniculi*  
479750-483250  
216 *Chlamydomydia pneumoniae* AR39  
238\* *Chlamydia trachomatis*

531250-532250  
334\* *Physcomitrella patens*  
533250-533750  
328\* *Encephalitozoon cuniculi*

***Clostridium acetobutylicum***

605250-608250  
138 *Bartonella henselae*  
150 *A calcoaceticus*  
161 *Enterococcus faecium*  
161 *Pasteurella multocida*  
162 *Acinetobacter* sp. ADP1  
824750-825250  
317\* *Acidianus ambivalens*  
1043250-1051750  
187 *Acetivibrio cellulolyticus*  
190 *Clostridium cellulovorans*  
212 *Clostridium josui*  
218 *Clostridium cellulolyticum*  
222 *Clostridium paraputrificum*  
1056750-1057250  
310\* *Clostridium tyrobutyricum*  
1058250-1062750  
163 *Clostridium cellulovorans*  
182 *Clostridium cellulolyticum*  
185 *T thermosulfurigenes*  
185 *Clostridium paraputrificum*  
186 *Suncus murinus*-A  
1231750-1239250  
285\* *Spizellomyces punctatus*  
1309250-1317250  
154 *Clostridium perfringens* pCP13-P  
159 *Borrelia burgdorferi* plp38-P

649750-653250  
215 *Chlamydia muridarum*  
221 *Fischerella* sp. Cohn  
224 *Streptococcus sanguinis*

160 *Reclinomonas americana*-M  
161 *Borrelia burgdorferi* plp28-3-P  
165 *Ochromonas danica*-M  
1821750-1822250  
288\* *Clostridium sticklandii*  
1914250-1914750  
309\* *Buchnera* sp APS pLeu-P  
2032250-2036250  
200 Bacteriophage A118  
202 Bovine adenovirus 4  
208 *Streptococcus dysgalactiae*  
209 *M thermolithotrophicus*  
209 Turkey adenovirus 3  
2138750-2140250  
221 *Neurospora crassa* plHarbin3-P  
227 *Staphylococcus aureus* pETB-P  
231 *Gracilaria robusta* pGro4970-P  
235\* *S haemolyticus* pNVH97A-P  
2142250-2142750  
317\* *Clostridium perfringens* pCP13-P  
2606750-2607750  
250\* *Clostridium sticklandii*  
2779250-2780250  
376\* *Gyatrix hermaphroditus*-A  
2817750-2818750  
223 *Loligo bleekeri*-M  
241\* *Prototheca wickerhamii*-M

225 Bovine adenovirus 2  
225 Ovine adenovirus A  
722250-723750  
259\* *Marinococcus halophilus*

2863250-2863750  
308\* *Mycoplasma virus* P1  
3076250-3077250  
347\* *Calonitophyllum medium*  
3270250-3271250  
307\* Beet curly top virus  
3276750-3280250  
193 *Clostridium sticklandii*  
193 *Clostridium pasteurianum*  
209 *Stylonychia lemnae*  
209 Rice tungro bacilliform virus  
212 *Lilium henryi*  
3306250-3308750  
186 *Clostridium sticklandii*  
200 *Acidianus ambivalens*  
207 *Clostridium pasteurianum*  
209 Feline foamy virus  
213 *Sulfolobus shibatae*  
3422250-3427750  
191 *Rickettsia helvetica*  
203 *Rickettsia rhipicephali*  
205 *Porphyra purpurea*  
208 *Rickettsia sibirica*  
208 *Rickettsia felis*  
3436250-3437750  
296\* *Acholeplasma* phage L2  
3477250-3480750

339\* *Sarcophyton glaucum*  
3569250-3571250  
229 *Clostridium cellulovorans*  
239\* *Acetivibrio cellulolyticus*

3774250-3774750  
324\* *Clostridium pasteurianum*  
3910750-3916750  
119 *Streptococcus salivarius*

120 *Streptococcus pneumoniae*  
121 *Streptococcus pneumoniae* R6  
126 *Streptococcus thermophilus*  
128 *Streptococcus pyogenes*

***Deinococcus radiodurans***

139750-146750  
164 *C striatum* pTP10-P  
172 *Deinococcus radiodurans* plCP1-P  
172 *Pseudomonas aureofaciens*  
175 *Gaeumannomyces graminis*  
176 *Mycobacterium leprae*  
217750-222250  
178 plasmid Bin 19-P  
184 *C striatum* pTP10-P  
193 *Arcanobacterium pyogenes*  
194 *Paecilomyces tenuipes*  
196 *Pseudomonas alcaligenes*  
309750-313750  
178 *Desulfovibrio vulgaris*  
188 *Hydrogenophaga pseudoflava*  
197 *Burkholderia* sp. PS12  
197 *Bifidobacterium animalis*  
199 *Streptomyces abikoensis*  
316250-316750  
297\* *Azospirillum brasilense*  
450750-452250  
274\* *Streptomyces ambofaciens*  
518250-538750  
329\* *Deinococcus radiodurans*  
544750-546750  
171 *Deinococcus radiodurans* plMP1-P

173 *Pseudomonas* sp  
176 *Pseudomonas putida* pWW0-P  
176 *Pseudomonas putida*  
178 *Arthrobacter nicotinovorans*  
549750-553750  
169 *Pseudomonas putida*  
172 *Aeromonas hydrophila*  
175 *Pseudomonas aureofaciens*  
177 *Pseudomonas alcaligenes*  
178 *Pseudomonas synxantha*  
671250-678750  
158 plasmid Bin 19-P  
158 *Enterobacter aerogenes*  
158 *Deinococcus radiodurans* plCP1-P  
164 *Pseudomonas azelaica*  
164 *Sphingomonas adhaesiva*  
691750-695250  
263\* *Actinomyces viscosus*  
921250-924750  
210 *Thauera selenatis*  
213 *Thauera aromatica*  
224 *Burkholderia* sp. PS12  
225 *S meliloti* phage PBC5  
225 *Burkholderia pyrrocinia*  
995250-995750  
310\* *Beroe ovata*  
1206750-1207250

340\* *Blastocladiella emersonii*  
1230750-1231250  
369\* *Deinococcus radiodurans*  
1239250-1240750  
208 plasmid Bin 19-P  
209 *Pseudomonas syringae glycinea*  
214 *Alcaligenes faecalis*  
217 *Erwinia chrysanthemi*  
219 *Pseudomonas syringae*  
1387250-1391250  
187 *D radiodurans* plMP1-P  
192 *Deinococcus radiodurans* plCP1-P  
196 *Arthrobacter nicotinovorans*  
197 *Pseudomonas* sp  
199 *Pseudomonas alcaligenes* pRA2-P  
1465250-1474750  
260\* *Actinosynnema pretiosum*  
1588750-1590750  
200 *Pseudomonas aureofaciens*  
204 Bacteriophage phi CTX  
204 Bacteriophage phi CTX  
207 *Pseudomonas fluorescens*  
208 *Pseudomonas resinovorans*  
1610250-1613250  
189 *Deinococcus radiodurans* plCP1-P  
209 *Halomonas alimentaria*  
210 *Burkholderia* sp. RASC

211 *Alicyclobacillus acidoterrestris*  
217 *Afipia felis*-A  
1674250-1677750  
199 *Pseudomonas* sp U2 pWWU2-P  
199 *Halomonas elongata*  
199 *Burkholderia* sp. RASC  
201 *Pseudomonas* sp  
203 *Pseudomonas putida* pWW0-P  
1745250-1748250  
189 plasmid Bin 19-P  
196 *Agrobacterium agile*  
199 *Desulfitobacterium hafniense*  
200 *Pseudomonas oleovorans*  
204 *Magnaporthe grisea*  
1832250-1832750  
319\* *Deinococcus radiodurans*  
1834750-1836250  
187 *Deinococcus radiodurans* plCP1-P  
189 *D radiodurans* plMP1-P  
190 *Deinococcus radiodurans*  
200 *Desulfovibrio vulgaris*  
205 *Ralstonia eutropha* H850  
1952750-1953250  
339\* *Thauera selenatis*  
1974250-1975250

231 *D radiodurans* plMP1-P  
239\* *Deinococcus radiodurans*  
2060750-2063250  
218 *Desulfovibrio vulgaris*  
232 *Hydrogenophaga pseudoflava*  
238\* *Streptomyces abikoensis*  
2113250-2116750  
175 *Pseudomonas* sp  
189 *Acidovorax avenae*  
190 *Halomonas elongata*  
191 *Pseudomonas chlororaphis*  
195 *Pseudomonas putida* pWW0-P  
2244250-2249250  
142 *Halomonas alimentaria*  
144 *Deinococcus radiodurans* plCP1-P  
156 *Centroscyllium fabricii*  
158 *Acetobacter aceti*  
159 *Gremmeniella abietina* mit RNA  
virus S1  
2347750-2348250  
350\* *Deinococcus radiodurans*  
2508750-2511250  
290\* *Pseudomonas brassicacearum*  
2580750-2589250  
139 *Halomonas elongata*

146 *Arthrobacter* sp. TM1  
147 *Pseudomonas* sp  
148 *C glutamicum* pAG1-P  
148 *C glutamicum* pAG4-P  
2612250-2613250  
321\* *Deinococcus radiodurans*  
2648250-2652250  
154 *Pseudomonas syringae*  
164 *Pseudomonas syringae glycinea*  
168 *Pseudomonas putida* pWW0-P  
169 *Pseudomonas aureofaciens*  
172 *Pseudomonas putida*  
2682250-2697750  
120 *C glutamicum* pCG4-P  
126 *Eremothecium gossypii*  
127 *Aspergillus terreus*  
136 *Aeromonas allosaccharophila*  
136 *Brevibacterium flavum*  
2791250-2792750  
229 Bacteriophage phi CTX  
229 Bacteriophage phi CTX  
233 *Herbaspirillum seropedicae*  
234 *Pseudomonas chlororaphis*  
237\* *Pseudomonas fluorescens*

### ***Escherichia coli* MG1655**

124250-127750  
227 *Enterobacter aerogenes*  
238\* *Enterobacter cloacae*  
150250-156250  
127 *Photobacterium luminescens*  
129 *Yersinia pseudotuberculosis*

131 *Yersinia enterocolitica* pYVe22-P  
131 *Y enterocolitica* pYVe8081-P  
132 *Yersinia pestis* pCD1-P  
235750-239250  
135 *Citrobacter rodentium*  
143 *Escherichia coli* pR721-P

153 *Yersinia pseudotuberculosis*  
153 *Shigella sonnei*  
157 *Yersinia enterocolitica*  
264750-265750  
258\* *Pantoea citrea*  
280750-288750

|                                            |                                          |                                             |
|--------------------------------------------|------------------------------------------|---------------------------------------------|
| 157 <i>D radiodurans</i> pIMP1-P           | 192 <i>Yersinia ruckeri</i>              | 872750-874750                               |
| 166 <i>Ralstonia solanacearum</i> pJTSP1-P | 197 <i>Yersinia pestis</i>               | 221 <i>Xenorhabdus nematophilus</i>         |
| 167 <i>Pseudomonas</i> sp. ADP pADP-1-P    | 200 <i>Kluyvera cryocrescens</i>         | 230 <i>Yersinia enterocolitica</i>          |
| 169 <i>Burkholderia gladioli</i>           | 202 <i>Erwinia carotovora</i>            | 234 <i>Photorhabdus luminescens</i>         |
| 169 <i>Pseudomonas stutzeri</i>            | 204 <i>Salmonella enterica</i>           | 240* <i>Yersinia pseudotuberculosis</i>     |
| 291250-295750                              | 566750-572250                            | 976250-977750                               |
| 146 <i>Microscilla</i> sp pSD15-P          | 109 <i>Citrobacter rodentium</i>         | 296* <i>Klebsiella aerogenes</i>            |
| 148 <i>Citrobacter rodentium</i>           | 112 <i>Shigella sonnei</i>               | 998750-999250                               |
| 149 <i>Escherichia coli</i> pR721-P        | 127 <i>Yersinia pseudotuberculosis</i>   | 299* <i>Yersinia ruckeri</i>                |
| 154 <i>Salmonella typhi</i> pR27-P         | 138 <i>Plesiomonas shigelloides</i>      | 1065250-1065750                             |
| 157 <i>Y enterocolitica</i> pYVe8081-P     | 142 <i>Bacillus firmus</i>               | 339* <i>E. coli</i> O157-H7 phage L1        |
| 310250-320250                              | 575750-585750                            | 1089250-1095250                             |
| 92 <i>Xenorhabdus nematophilus</i>         | 107 <i>Citrobacter rodentium</i>         | 114 <i>Yersinia enterocolitica</i>          |
| 104 <i>Shigella boydii</i>                 | 110 <i>Shigella sonnei</i>               | 114 <i>Shigella boydii</i>                  |
| 111 <i>Photorhabdus luminescens</i>        | 111 <i>Escherichia coli</i> pR721-P      | 124 <i>Xenorhabdus nematophilus</i>         |
| 113 <i>Yersinia enterocolitica</i>         | 119 <i>Yersinia pseudotuberculosis</i>   | 125 <i>Yersinia enterocolitica</i> pYVe22-P |
| 118 <i>Shigella flexneri</i> pvir-P        | 129 <i>Plesiomonas shigelloides</i>      | 127 <i>Photorhabdus luminescens</i>         |
| 333250-333750                              | 620750-622250                            | 1101750-1104750                             |
| 337* <i>Salmonella enterica</i>            | 229 <i>Pectobacterium atrosepticum</i>   | 151 <i>Citrobacter rodentium</i>            |
| 338250-339250                              | 236* <i>Serratia marcescens</i>          | 160 <i>Proteus vulgaris</i>                 |
| 310* <i>Bordetella avium</i>               | 635750-636750                            | 164 <i>Escherichia coli</i> pR721-P         |
| 390750-392250                              | 247* <i>Wolbachia pipientis</i>          | 169 <i>Yersinia pseudotuberculosis</i>      |
| 220 <i>Salmonella enterica</i> pvir-P      | 676250-677750                            | 169 <i>Shigella sonnei</i>                  |
| 229 Bacteriophage Mu                       | 205 <i>Salmonella enterica</i>           | 1194750-1201250                             |
| 230 <i>Salmonella typhimurium</i> pSLT-P   | 206 <i>Shigella dysenteriae</i>          | 119 <i>Citrobacter rodentium</i>            |
| 232 <i>Erwinia amylovora</i> pEA29-P       | 207 <i>Salmonella enteritidis</i>        | 127 <i>Escherichia coli</i> pR721-P         |
| 233 <i>Erwinia herbicola</i>               | 207 <i>Citrobacter freundii</i>          | 134 <i>Salmonella typhi</i> pR27-P          |
| 521250-528750                              | 208 <i>Escherichia coli</i> O157-H7      | 135 <i>Shigella sonnei</i>                  |
| 145 <i>Salmonella typhimurium</i> pSLT-P   | 728750-738250                            | 137 <i>Y enterocolitica</i> pYVe8081-P      |
| 147 <i>Serratia entomophila</i> pADAP-P    | 133 <i>Salmonella enterica</i> pvir-P    | 1208250-1221750                             |
| 150 <i>Salmonella enterica</i> pvir-P      | 135 <i>Salmonella typhimurium</i> pSLT-P | 92 <i>Citrobacter rodentium</i>             |
| 160 <i>Salmonella dublin</i>               | 142 Bacteriophage P4                     | 97 <i>Shigella sonnei</i>                   |
| 167 <i>Escherichia coli</i> pCloDF13-P     | 144 Bacteriophage 933W                   | 97 <i>Yersinia pseudotuberculosis</i>       |
| 559250-561250                              | 145 <i>Escherichia coli</i> pO157-P      | 120 <i>Yersinia enterocolitica</i>          |

120 *Plesiomonas shigelloides*  
1227250-1228250  
220 *E. coli* O157-H7 bacteriophage L1  
222 *E. coli* O157-H7 EDL9333  
232 *Salmonella Typhi* CT18-P  
233 *Salmonella dublin*  
1411750-1418250  
120 *Salmonella enterica* pHCM1-P  
120 *Salmonella typhi* CT18 pHCM1-P  
122 *Shigella boydii*  
122 Bacteriophage H-19B  
125 *Escherichia coli* pB171-P  
1421750-1424250  
166 *Citrobacter rodentium*  
171 *Yersinia pseudotuberculosis*  
177 *Y. enterocolitica* pYVe8081-P  
180 *Shigella sonnei*  
181 *Yersinia enterocolitica* pYVe22-P  
1430750-1434250  
132 *Escherichia coli* pR721-P  
157 *Xenorhabdus nematophilus*  
157 *Citrobacter rodentium*  
158 Bacteriophage If1  
159 *Shigella sonnei*  
1474250-1475750  
204 *Xenorhabdus nematophilus*  
204 *Photorhabdus luminescens*  
207 *Yersinia pestis* pCD1-P  
207 *Y. enterocolitica* pYVe8081-P  
1525750-1531250  
117 *Shigella flexneri* pvir-P  
118 *Shigella flexneri* pCP301-P  
121 *Shigella boydii*  
121 *Escherichia coli* pB171-P

132 *Escherichia coli* pO157-P  
1541750-1544750  
168 *Proteus mirabilis*  
191 *Shewanella hanedai*  
192 *Shigella sonnei*  
193 *Manduca sexta*  
193 *Vibrio fischeri*  
1574750-1588750  
100 *Yersinia enterocolitica*  
103 *Yersinia enterocolitica* pYVe22-P  
103 *Photorhabdus luminescens*  
104 *Y. enterocolitica* pYVe8081-P  
108 *Yersinia pestis* pCD1-P  
1593750-1594750  
241\* *Erwinia pyrifoliae*  
1629250-1641250  
90 *Escherichia coli* pR721-P  
112 *Salmonella typhi* pR27-P  
116 *Xenorhabdus nematophilus*  
117 *Shigella boydii*  
118 Bacteriophage If1  
1644250-1646750  
147 *Escherichia coli* pR721-P  
164 *Y. enterocolitica* pYVe8081-P  
164 *Salmonella typhi* pR27-P  
169 *Yersinia enterocolitica* pYVe22-P  
169 *Bacillus subtilis*  
1770250-1770750  
296\* *Bacteroides fragilis*  
1800250-1803750  
160 *Yersinia pseudotuberculosis*  
161 *Escherichia coli* pR721-P  
166 *Plesiomonas shigelloides*  
166 *Citrobacter rodentium*

169 *Yersinia enterocolitica*  
1853250-1854750  
182 *Salmonella enteritidis*  
189 *Salmonella enterica*  
196 *Escherichia coli* O157-H7  
197 *Citrobacter freundii*  
198 *Erwinia carotovora*  
1868750-1870750  
164 *Yersinia enterocolitica*  
172 *Shigella boydii*  
178 *Yersinia enterocolitica* pYVe22-P  
180 *Plesiomonas shigelloides*  
181 *Yersinia pestis* pCD1-P  
2033250-2035750  
146 *Yersinia enterocolitica*  
157 *Yersinia enterocolitica* pYVe22-P  
159 *Y. enterocolitica* pYVe8081-P  
160 *Yersinia pestis* pCD1-P  
2036750-2042250  
125 *Shigella boydii*  
129 *Y. enterocolitica* pYVe8081-P  
130 *Yersinia enterocolitica* pYVe22-P  
131 *Yersinia enterocolitica*  
131 *Escherichia coli* pR721-P  
2052250-2058250  
128 *Yersinia enterocolitica*  
128 *Salmonella enterica*  
128 *Shigella boydii*  
129 *Yersinia pestis* pCD1-P  
2067250-2074750  
153 *Salmonella typhimurium* pSLT-P  
172 *Salmonella enterica* pvir-P  
176 *Serratia entomophila* pADAP-P  
181 *Shigella sonnei* pCollb-P9-P

189 *Morganella morganii*  
2099250-2110750  
93 *Shigella sonnei*  
104 *Citrobacter rodentium*  
120 *Vibrio anguillarum*  
122 *Legionella pneumophila*  
128 *Enterococcus faecium*  
2185750-2190750  
151 *Yersinia pseudotuberculosis*  
163 *Yersinia enterocolitica*  
164 *Photothabdus luminescens*  
174 *Plesiomonas shigelloides*  
177 *Citrobacter rodentium*  
2380750-2386250  
122 *Yersinia enterocolitica*  
124 *Yersinia pseudotuberculosis*  
127 *Citrobacter rodentium*  
131 *Photothabdus luminescens*  
137 *Xenorhabdus nematophilus*  
2460250-2463750  
151 *Shigella boydii*  
152 *Salmonella typhi* pR27-P  
152 *Yersinia enterocolitica*  
153 Bacteriophage APSE-1  
154 *Y enterocolitica* pYVe8081-P  
2464750-2469750  
126 *Shigella sonnei*  
133 *Bacteroides fragilis*  
134 *Citrobacter rodentium*  
141 *Paenibacillus popilliae*  
143 *Yersinia pseudotuberculosis*  
2478750-2492750  
97 *Yersinia enterocolitica*  
100 *Yersinia pseudotuberculosis*

114 *Photothabdus luminescens*  
115 *Y enterocolitica* pYVe8081-P  
116 *Yersinia enterocolitica* pYVe22-P  
2565750-2566250  
418\* *Serratia marcescens*  
2753750-2765250  
110 *Yersinia pestis* pCD1-P  
112 *Salmonella typhi* pR27-P  
113 *Yersinia enterocolitica* pYVe22-P  
115 *Y enterocolitica* pYVe8081-P  
2770250-2774250  
141 *Plesiomonas shigelloides*  
141 *Yersinia enterocolitica*  
146 *Shigella sonnei*  
147 *Citrobacter rodentium*  
147 *Yersinia pseudotuberculosis*  
2779250-2786250  
116 *Shigella sonnei*  
126 *Vibrio fischeri*  
127 *Citrobacter rodentium*  
127 *Proteus mirabilis*  
132 *Shewanella hanedai*  
2789250-2790250  
273\* *Pectobacterium chrysanthemi*  
2878750-2883750  
138 *Salmonella typhi* pR27-P  
141 *Yersinia enterocolitica* pYVe22-P  
142 *Y enterocolitica* pYVe8081-P  
143 *Yersinia pestis* pCD1-P  
2899750-2903750  
163 *Yersinia enterocolitica*  
164 *Yersinia ruckeri*  
170 *Yersinia pseudotuberculosis*  
172 *Salmonella enterica*

173 *Photothabdus luminescens*  
2983250-2995750  
115 *Shigella sonnei*  
115 *Vibrio fischeri*  
124 *Proteus mirabilis*  
127 *Staphylococcus carnosus*  
128 *Xenorhabdus nematophilus*  
3184250-3190750  
102 *Yersinia pseudotuberculosis*  
111 *Yersinia enterocolitica*  
113 *Photothabdus luminescens*  
122 *Y enterocolitica* pYVe8081-P  
124 *Yersinia enterocolitica* pYVe22-P  
3262250-3267750  
133 *A actinomycetemcomitans*  
144 *Coxiella burnetii*  
145 *Coxiella burnetii* pQpRS-P  
146 *Coxiella burnetii* pQpDV-P  
146 *Citrobacter rodentium*  
3286750-3287250  
368\* *Erwinia carotovora*  
3359750-3361250  
202 *Shigella boydii*  
207 *Salmonella typhi* pR27-P  
214 *Yersinia pestis* pCD1-P  
216 *Escherichia coli* pR721-P  
3447250-3448750  
220 *Vibrio proteolyticus*  
237\* *Salmonella enterica* pHCM2-P  
3468750-3470250  
278\* *Pelobacter acidigallici*  
3578250-3582250  
123 *Shigella sonnei*  
129 *Citrobacter rodentium*

145 *Proteus mirabilis*  
 146 *Yersinia pseudotuberculosis*  
 155 *Bombyx mori*  
 3614250-3620750  
 178 *Pantoea agglomerans*  
 189 *Pectobacterium chrysanthemi*  
 196 *Morganella morganii*  
 198 *Erwinia chrysanthemi*  
 203 *Klebsiella aerogenes*  
 3628750-3633250  
 149 *Proteus mirabilis*  
 157 *Shigella sonnei*  
 165 *Citrobacter rodentium*  
 168 *Shewanella hanedai*  
 168 *Vibrio fischeri*  
 3648750-3655750  
 100 *Yersinia pseudotuberculosis*  
 103 *Yersinia enterocolitica*  
 114 *Citrobacter rodentium*  
 115 *Photorhabdus luminescens*  
 119 *Shigella sonnei*  
 3663250-3664750  
 185 *E coli O157-H7 EDL9333*  
 186 *E coli O157-H7 0509952*  
 194 *Salmonella dublin*  
 196 *Citrobacter freundii*  
 3759250-3768250  
 142 *Escherichia coli* pO157-P  
 146 *Shigella flexneri*  
 148 Bacteriophage P4  
 149 Bacteriophage 933W  
 153 *Erwinia amylovora* pEA29-P

3792250-3804750  
 118 *Shigella sonnei*  
 120 *Proteus mirabilis*  
 130 *A actinomycetemcomitans*  
 138 *Citrobacter rodentium*  
 140 *Staphylococcus aureus* pJ3356-P  
 3835250-3835750  
 318\* Bacteriophage HK620  
 4041750-4042250  
 301\* *Lactobacillus plantarum*  
 4059250-4061250  
 193 Bacteriophage APSE-1  
 193 *Yersinia enterocolitica*  
 195 *Photorhabdus luminescens*  
 199 *Yersinia pseudotuberculosis*  
 201 *Yersinia ruckeri*  
 4178250-4185750  
 207 *Salmonella enterica* pHCM2-P  
 207 *Salmonella typhi* CT18 pHCM2-P  
 214 *Yersinia pestis* pMT1-P  
 214 *Yersinia pestis* pCD1-P  
 226 *Vibrio proteolyticus*  
 4218250-4219250  
 230 *Shigella sonnei*  
 238\* *Citrobacter rodentium*  
 4312750-4321250  
 126 *Klebsiella aerogenes*  
 147 *Pectobacterium chrysanthemi*  
 164 *Serratia marcescens*  
 177 *Xanthomonas campestris*  
 178 *Xanthomonas oryzae*  
 4356250-4358250

188 *Photorhabdus luminescens*  
 192 *Yersinia pseudotuberculosis*  
 192 *Yersinia enterocolitica*  
 199 *Xenorhabdus nematophilus*  
 201 *Yersinia ruckeri*  
 4471250-4476250  
 149 *Yersinia enterocolitica*  
 154 *Citrobacter rodentium*  
 155 *Yersinia pseudotuberculosis*  
 156 *Salmonella typhi* pR27-P  
 159 *Y enterocolitica* pYVe8081-P  
 4498750-4505250  
 109 *Escherichia coli* pR721-P  
 116 *Y enterocolitica* pYVe8081-P  
 116 *Yersinia enterocolitica* pYVe22-P  
 121 *Shigella flexneri* pvir-P  
 4510750-4511750  
 261\* *Pseudomonas syringae*  
 4532750-4541750  
 104 *Yersinia pseudotuberculosis*  
 113 *Yersinia enterocolitica*  
 116 *Photorhabdus luminescens*  
 117 *Citrobacter rodentium*  
 118 *Xenorhabdus nematophilus*  
 4573750-4577250  
 120 *Yersinia pseudotuberculosis*  
 131 *Citrobacter rodentium*  
 133 *Yersinia enterocolitica*  
 134 *Shigella sonnei*  
 135 *Xenorhabdus nematophilus*

***haemophilus influenzae***



51750-52750  
185 *Prochlorococcus marinus*  
206 *Borrelia burgdorferi*  
208 *Borrelia burgdorferi* cp32-1-P  
209 *Borrelia burgdorferi* cp32-8-P  
211 *Borrelia burgdorferi* pcp32-3-P  
120250-121250  
244\* *Mesostigma viride* chloroplast  
285750-287250  
202 *Staphylococcus hominis*  
207 *Odontella sinensis*  
210 *Staphylococcus haemolyticus*  
212 *Guillardia theta* chloroplast  
219 *Staphylococcus aureus* pVRSAP-P  
532250-533250  
275\* *Listeria grayi*

### ***Helicobacter pylori* J99**

128250-131250  
317\* *Helicobacter pylori* pHPM8-P  
300250-302750  
235\* *Alteromonas* phage PM2  
458750-459750  
255\* *Helicobacter pylori* pHPM186-P  
461250-463750  
178 *Helicobacter pylori* pHPM8-P  
199 *Helicobacter pylori* pHPM186-P  
212 *Carnobacterium alterfunditum*  
215 *Borrelia burgdorferi* plp28-2-P  
217 *Lactococcus lactis* pCI305-P  
466250-466750  
320\* *Helicobacter pylori* 26695

534750-535250  
333\* *Pediococcus pentosaceus*  
597750-599250  
260\* *Desulfosporosinus orientis*  
839750-841250  
216 *Colwellia maris*  
243\* *Moritella marina*  
919250-925250  
144 *Staphylococcus aureus* pETB-P  
155 *Methanococcus aeolicus*  
159 *Staphylococcus aureus* pN315B-P  
159 *Mesostigma viride* chloroplast  
163 *Staphylococcus aureus* 21kb pl-P  
1302250-1303250  
338\* *Photobacterium profundum*  
1561750-1564250

473750-478750  
198 *Helicobacter pylori* pHPM8-P  
204 *Francisella tularensis* pnovicid-P  
204 *Francisella tularensis* pFNL10-P  
208 *Helicobacter pylori* pHPM186-P  
212 *Borrelia burgdorferi* plp28-2-P  
554750-569750  
180 *Helicobacter pylori* pHPM186-P  
182 *Lactococcus lactis* pSH72-P  
194 *Lactococcus lactis* pAH82-P  
195 *Helicobacter pylori* pHPM8-P  
201 *Bacillus subtilis* pTA1040-P  
649750-650250  
336\* Bacteriophage APSE-1

242\* *M haemolytica* pMHSCS1-P  
1571250-1589750  
159 *Vibrio cholerae* Chr2  
160 *Shewanella affinis*  
167 *Vibrio vulnificus*  
168 *Vibrio cholerae* Chr1  
168 Bacteriophage K139  
1766750-1769250  
198 *Cyanophora paradoxa*  
210 *Borrelia burgdorferi*  
212 *Cyanidioschyzon merolae*-M  
213 *Tribolium castaneum*-M  
216 *Mesostigma viride* chloroplast  
1806250-1807250  
292\* *Colwellia maris*

746750-749250  
231 *Acinetobacter* sp  
231 *Bartonella quintana*  
234 *Streptococcus gordonii*  
236\* *Bacillus pumilus*  
967250-968250  
340\* *Shewanella* sp  
981250-984750  
236\* *Helicobacter pylori* J99  
1052250-1060250  
200 *Francisella tularensis* pnovicid-P  
200 *Francisella tularensis* pFNL10-P  
206 *Helicobacter pylori* pHPM8-P  
220 *Borrelia burgdorferi* cp32-1-P

221 Plasmid pCD4-P  
1064750-1067750  
229 *Campylobacter jejuni*  
244\* *Rhodomonas salina*-M  
1068750-1069750  
271\* *Helicobacter pylori* pHPM8-P

1204750-1205250  
395\* *Chlorella vulgaris*  
1221250-1222750  
285\* *Alteromonas* phage PM2  
1270750-1272250  
264\* Bacteriophage APSE-1

1594250-1599250  
223 *Campylobacter jejuni*  
225 *Mycoplasma pulmonis*  
230 *Rhodomonas salina*-M  
236\* *Mycoplasma hyopneumoniae*

***Methanobacterium thermoautotrophicum***

39250-61250  
153 Walleye dermal sarcoma virus  
160 Ovine pulmonary adenocarcinoma  
virus  
163 Ovine enzootic nasal tumour virus  
163 Equine foamy virus  
164 *Oryza sativa*  
256750-264250  
182 *Chlamydophila pneumoniae* AR39  
182 *Chlamydia pneumoniae* J138  
182 *Chlamydia pneumoniae* TW-183  
182 *Chlamydia muridarum*  
185 *Oenothera elata* chloroplast  
267750-277250  
142 *Ricinus communis*  
153 *Lotus japonicus* Chr3  
154 *Glycine max*  
155 *Lotus japonicus* Chr6  
157 *Lotus japonicus* Chr1  
437250-445250

191 *Methanobacterium aarhusense*  
231 *Methanobacterium formicicum*  
237\* *Methanothermobacter wolfeii*  
513250-513750  
337\* *Fusobacterium necrophorum*  
580250-581750  
222 *Ricinus communis*  
236\* *Staphylococcus intermedius*  
636750-650750  
158 Walleye dermal sarcoma virus  
161 Mouse adenovirus 2 strain K87  
161 Murine hepatitis virus  
173 *Perina nuda* picorna-like virus-A  
173 Human papillomavirus type 63  
831750-841750  
100 *Methanobacterium aarhusense*  
151 *Methanobacterium formicicum*  
173 *Saccharum* sp  
177 *Microscilla* sp pSD15-P  
180 *Methanothermobacter wolfeii*

978750-994250  
285\* *Oikopleura longicauda*  
1000750-1006750  
170 *Methanobacterium aarhusense*  
191 *Methanothermobacter wolfeii*  
191 *M wolfeii* psiM100-P  
197 Northern cereal mosaic virus-A  
200 Australian bat lyssavirus  
1198250-1198750  
340\* *Thermoplasma acidophilum*  
1471250-1476750  
327\* *Oikopleura longicauda*  
1516750-1517250  
330\* *Chaetoceros ressum*  
1736250-1737750  
223 *Mustelus manazo*-M  
228 *Sulfolobus acidocaldarius*  
228 *Scyliorhinus canicula*-M  
229 *Mertensiella luschani*-M  
233 Simian foamy virus

### ***Methanococcus jannaschi***

207250-209250

271\* Hepatitis A virus

769750-776250

187 *Clarkia epilobioides*

196 Tupaia paramyxovirus

197 Human papillomavirus type 65

197 Human papillomavirus type 4

198 Feline syncytial virus

973250-974250

270\* *Pyrococcus furiosus*

1001750-1002250

375\* *W brevipalpis* pWb1-P

1131250-1136250

165 *Glycine max*

172 *Clarkia epilobioides*

172 *Prochlorococcus marinus*

175 *Mesembryanthemum crystallinum*

176 Lake Victoria marburgvirus

1158750-1159250

338\* *Riemerella anatipestifer* pCFC1-P

1344250-1344750

321\* Variola major virus

### ***Mycobacterium tuberculosis***

332250-340750

430\* *Frankia* sp. CpI1 pFQ12-P

360250-364250

299\* *Frankia* sp. CpI1 pFQ12-P

366750-374750

362\* *Mycobacterium marinum*

424250-434250

409\* *Aeromonas* sp. 10S-24

483250-485750

196 *Mycobacterium leprae*

204 *M methylotropha*

205 *Agrobacterium agile*

207 *Arcanobacterium pyogenes*

207 *A tumefaciens* pTi-SAKURA-P

621750-626250

274\* *Streptomyces noursei*

670750-676750

364\* *Frankia* sp. CpI1 pFQ12-P

744250-747750

232 *Frankia* sp. CpI1 pFQ12-P

252\* *Actinosynnema pretiosum*

834750-842250

336\* *Frankia* sp. CpI1 pFQ12-P

924250-931250

365\* *Frankia* sp. CpI1 pFQ12-P

966750-967750

236\* *Mycobacterium tuberculosis*

1089250-1094750

298\* *Streptomyces noursei*

1102750-1105750

183 *Xylella fastidiosa*

194 *Alcanivorax borkumensis*

195 *Alcaligenes faecalis*

196 *Corynebacterium diphtheriae*

197 *Thiobacillus aquaesulis*

1186750-1192250

439\* *Frankia* sp. CpI1 pFQ12-P

1210250-1220250

331\* *Streptomyces ambofaciens*

1385750-1386250

517\* *Frankia* sp. CpI1 pFQ12-P

1487250-1490750

303\* *Streptomyces ambofaciens*

1572250-1575250

323\* *Frankia* sp. CpI1 pFQ12-P

1618250-1620750

412\* *Frankia* sp. CpI1 pFQ12-P

1629250-1638750

341\* *Frankia* sp. CpI1 pFQ12-P

1691250-1697250

112 *A tumefaciens* pTi-SAKURA-P

118 *Agrobacterium tumefaciens* pTi-P

120 *Oligotropha carboxidovorans*

123 *Burkholderia* sp. RP007

124 *Agrobacterium agile*

1862250-1866750

333\* *Rhodocista pekingensis*

1988750-1993250

357\* *Frankia* sp. CpI1 pFQ12-P

2043750-2044750

226 *Mycobacterium tuberculosis*

226 *M tuberculosis* H37RV

232 *Methylobacter bovis*

244\* *Mycobacterium avium*  
2059750-2062250  
329\* *Streptomyces ambofaciens*  
2163750-2168750  
298\* *Mycobacterium leprae*  
2321750-2322250  
320\* *Amycolatopsis mediterranei*  
2358750-2359250  
329\* *Bordetella pertussis*  
2419250-2425750  
217 *Frankia* sp. CpI1 pFQ12-P  
225 *Streptomyces ambofaciens*  
234 *Streptomyces noursei*  
251\* *Streptomyces fradiae*  
2614750-2615250  
316\* *Sphingomonas* sp

### ***Pyrococcus abyssi***

1142250-1148750  
126 *Nicotiana tabacum*  
140 *Nicotiana glauca*  
143 *Psilotum nudum*

### ***Pyrococcus furiosus***

2250-4750  
138 *Clostridium histolyticum*  
145 *Sulfolobus tokodaii*  
167 *Clostridium acetobutylicum*  
167 *Porphyra pulchra* pl Pp6859-P  
177 *Clostridium difficile*  
26750-30250  
385\* *Triticum aestivum*

2636250-2637250  
212 *Mycobacterium microti*  
226 *Mycobacteriophage Bxb1*  
234 *Mycobacterium bovis*  
237\* *Rhodococcus* sp. CIR2  
2794250-2798250  
305\* *Streptomyces noursei*  
2800250-2806250  
390\* *Frankia* sp. CpI1 pFQ12-P  
2959750-2962750  
367\* *Frankia* sp. CpI1 pFQ12-P  
3052750-3056750  
278\* *Rhodocista pekingensis*  
3119750-3125750  
134 *Mycobacterium canettii*  
188 *Mycobacterium microti*

143 *Psilotum nudum* chloroplast  
144 *Lotus japonicus*  
1616250-1627250  
138 *Sulfolobus solfataricus*

203250-203750  
329\* *Xiphophorus maculatus*  
671750-673750  
214 *Thermococcus fumicolans*  
236\* *Pyrococcus abyssi*  
695250-699250  
346\* *Sulfolobus islandicus* pHEN7-P  
701250-714250

237\* *Cucumaria salma*-A  
3478750-3479750  
251\* *Oligotropha carboxidovorans*  
3730250-3752250  
340\* *Mycobacterium tuberculosis*  
3757250-3766250  
351\* *Mycobacterium tuberculosis*  
3777250-3782250  
258\* *Streptomyces thermoviolaceus*  
3800750-3805250  
346\* *Frankia* sp. CpI1 pFQ12-P  
3925250-3951750  
539\* *Frankia* sp. CpI1 pFQ12-P  
4030250-4034250  
276\* *Streptomyces ambofaciens*

146 *Sulfolobus shibatae*  
147 *Psilotum nudum*  
147 *Psilotum nudum* chloroplast  
160 *Acidianus ambivalens*

163 *Archaeoglobus fulgidus*  
170 *Thermococcus fumicolans*  
174 *Pyrococcus glycovorans*  
185 *Pyrococcus abyssi*  
190 *Thermococcus hydrothermalis*  
723750-727750  
169 *Thermococcus fumicolans*  
173 *Thermococcus hydrothermalis*

179 *Pyrococcus abyssi*  
197 *Thermococcus zilligii*  
204 *Thermococcus kodakaraensis*  
775750-783250  
135 *Listeria innocua* pLI100-P  
135 *Schizosaccharomyces pombe*  
141 *Streptococcus thermophilus*  
143 *Chlamydia muridarum* pMoPn-P  
143 *Arabidopsis thaliana*

787250-789750  
203 *Pyrococcus abyssi*  
217 *Pyrococcus glycovorans*  
232 *Thermococcus acidaminovorans*  
257\* *Pyrococcus horikoshii*  
1152250-1152750  
355\* *Megaceros aenigmaticus*  
1354750-1356250  
280\* *Struthio camelus*

1699750-1700250  
290\* *Pyrococcus furiosus*  
1899250-1905750  
138 *Cryptosporidium parvum*  
140 *Lycopersicon esculentum*  
144 *Solanum tuberosum*  
146 *Bacillus thuringiensis*  
146 *Bacillus anthracis*

### ***Pyrococcus horikoshii***

347250-348750  
259\* *Pyrococcus abyssi*  
382250-387250  
125 *Clostridium beijerinckii*  
132 *Bacillus anthracis* pPX01-P  
133 *Cryptosporidium parvum*  
136 *Porphyra purpurea*  
142 *Clostridium acetobutylicum*  
390250-392750

177 *Bacillus anthracis*  
177 *Bacillus thuringiensis*  
184 *Psilotum nudum*  
184 *Psilotum nudum* chloroplast  
184 *M thermolithotrophicus*  
489750-492250  
243\* *Ehrlichia platys*  
493750-499750  
205 *Pyrococcus abyssi*

209 *Pyrococcus glycovorans*  
228 *Thermococcus acidaminovorans*  
253\* *Balanoglossus carnosus*-M  
933250-938750  
423\* *Oryza sativa* mit plB1-PM  
1068250-1068750  
299\* *Cyprinodon macularius*

### ***Rickettsia prowazekii***

30250-31750  
244\* *Borrelia burgdorferi* plp38-P  
91750-92750  
195 *Borrelia burgdorferi* plp56-P  
199 *Borrelia burgdorferi* plp36-P  
208 *Borrelia burgdorferi* plp38-P  
209 *Borrelia burgdorferi* plcp18-2-P  
212 *Borrelia burgdorferi* pcp32-3-P  
163250-167250  
152 *Clostridium saccharobutylicum*

153 *S aureus* phage phi 12  
156 *Streptococcus agalactiae*  
157 *Porphyra purpurea*  
159 *S aureus* phage phiSLT  
426750-428750  
192 *Prototheca wickerhamii*-M  
202 *Clostridium botulinum*  
209 *Gracilaria robusta* pGro4970-P  
209 *Tetradontophora bielensis*-M  
209 *Rhizophyidium* sp.136 mit-M

534250-534750  
306\* *Rickettsia rickettsii*  
556250-559750  
256\* *Plasmodium reichenowi*-M  
815750-816750  
258\* *F nucleatum* pKH9-P  
882250-886250  
229 Israeli tick typhus *rickettsia*  
232 *Rickettsia japonica*  
232 *Astrakhan rickettsia*

232 *Rickettsia africae*  
232 *Rickettsia aeschlimannii*

892750-893750  
258\* *Francisella tularensis*

1005750-1006250  
269\* *Rickettsia conorii*

### ***Synechocystis* sp PCC6803**

22250-30750

141 *Lactobacillus gasseri*  
144 *Pachysolen tannophilus*  
150 *Lactobacillus helveticus* pLH1-P  
150 *Debaryomyces occidentalis*  
151 *Legionella longbeachae*

102750-107750

136 *Prochlorococcus marinus*  
137 *Lactobacillus lactis* pl-P  
137 *Lactococcus lactis* pK214-P  
139 *Lactococcus lactis* pNZ4000-P  
143 *Cyanidium caldarium* chloroplast

250750-255250

150 *Microcystis aeruginosa*  
159 *Legionella pneumophila*  
160 *Pasteurella aerogenes*  
160 *Nostoc punctiforme*  
160 *Enterococcus faecalis*

359250-381750

101 *Legionella longbeachae*  
110 *Streptococcus thermophilus*  
114 *Lactobacillus helveticus* pLH1-P  
116 *Legionella pneumophila*  
116 *Schizosaccharomyces pombe*

473750-477750

155 *Lactococcus lactis*  
156 *Dirofilaria immitis*  
160 *Listeria innocua* pLI100-P  
161 Bacteriophage bIL285

165 *S thermophilus* pER35-P  
497750-499750  
222 *Nostoc punctiforme*  
222 *Nostoc* sp. pCC7120 pepsilon-P  
228 *Nostoc* sp. pCC7120 pbeta-P  
228 *Nostoc* sp. PCC 7120  
229 *Anabaena* PCC7120

513750-515250

199 *Lactococcus lactis*  
200 *Streptococcus mutans*  
204 *Legionella longbeachae*  
205 *Streptococcus thermophilus*

525250-529750

278\* *Coccoltrema pocillarium*

572750-575250

159 *Streptococcus agalactiae*  
161 *Cyanidium caldarium* chloroplast  
162 *Legionella longbeachae*  
166 *Listeria innocua* pLI100-P  
167 *Lactococcus* phage BK5-T

588250-592250

270\* *Pseudomonas* sp. KFCC10818

650250-650750

346\* *Anabaena* sp. strain ATCC29413

660250-664750

151 *Microcystis aeruginosa*  
152 *Nostoc punctiforme*  
166 *Anabaena* PCC7120  
168 *Nostoc* sp. PCC 7120

171 *Nostoc* sp. pCC7120 pbeta-P

716250-719750

173 *Legionella longbeachae*  
173 Bacteriophage bIL286  
174 *Lactobacillus helveticus* pLH1-P  
175 Bacteriophage bIL309  
178 *Lactobacillus gasseri*

784250-788750

150 *Legionella longbeachae*  
173 *Candida boidinii*  
173 *Lactobacillus helveticus* pLH1-P  
174 *Methanococcus maripaludis*  
175 *P pentosaceus* pMD136-P

855750-858250

212 *Synechocystis* sp  
241\* *Geosmithia argillacea*-A

895250-897750

186 *Synechocystis* sp PCC6803  
226 *Nostoc* sp. PCC 7120  
227 *Microcystis aeruginosa*  
228 *Anabaena variabilis*  
230 *Nostoc punctiforme*

899250-900250

263\* *Lactobacillus gasseri*

919250-920750

210 *Lactobacillus gasseri*  
217 *Pachysolen tannophilus*  
217 *Microcystis aeruginosa*  
221 *Enterococcus faecalis*

221 *Legionella pneumophila*  
967250-967750  
306\* *Echinococcus multilocularis*-M  
1000250-1003750  
197 *Nostoc punctiforme*  
200 *Nostoc* sp. PCC 7120  
203 *Legionella pneumophila*  
204 *Anabaena* PCC7120  
204 *Nostoc* sp. pCC7120 pepsilon-P  
1111750-1112250  
311\* *Tupaia paramyxovirus*  
1127250-1127750  
352\* *Synechocystis* sp  
1197750-1205250  
161 *Lactobacillus gasseri*  
162 *Legionella longbeachae*  
169 *Francisella tularensis*  
170 *Legionella pneumophila*  
171 *Lactobacillus helveticus* pLH1-P  
1291250-1296750  
152 *Microcystis aeruginosa*  
154 *Legionella pneumophila*  
156 *Prochlorococcus marinus*  
157 *Streptococcus thermophilus*  
158 *Streptococcus mutans*  
1367750-1371250  
161 *Microcystis aeruginosa*  
162 *Pasteurella haemolytica*  
168 *Lactobacillus gasseri*  
168 *Dendroctonus jeffreyi*  
173 *Lactobacillus helveticus* pLH1-P  
1374250-1383250  
135 *Lactobacillus helveticus* pLH1-P  
135 *Enterococcus faecalis*

140 *Lactococcus lactis*  
143 *Legionella longbeachae*  
143 Bacteriophage bIL309  
1422250-1426750  
251\* *Aureobasidium pullulans*  
1553750-1555250  
218 *Psilotum nudum*  
218 *Psilotum nudum* chloroplast  
223 *Triticum aestivum*  
227 *Clostridium sticklandii*  
228 *Chlamydia trachomatis* pCHL1-P  
1614750-1617250  
187 *Psilotum nudum*  
187 *Psilotum nudum* chloroplast  
193 *Listeria innocua* pLI100-P  
193 *Clostridium sticklandii*  
196 *Sulfolobus shibatae*  
1621750-1633250  
109 *Legionella longbeachae*  
115 *Listeria innocua* pLI100-P  
118 *Lactobacillus helveticus* pLH1-P  
119 Bacteriophage bIL285  
120 Bacteriophage bIL309  
1638250-1640250  
169 *Microcystis aeruginosa*  
172 *Lactobacillus helveticus* pLH1-P  
180 *Streptococcus uberis*  
182 *Lactobacillus gasseri*  
183 Chlorarachnion CCMP1408  
1647750-1651250  
142 *Lactococcus lactis*  
150 *Streptococcus thermophilus*  
150 Bacteriophage bIL285  
151 Bacteriophage bIL309

153 *Streptococcus mutans*  
1725250-1730750  
153 *Legionella longbeachae*  
159 Bacteriophage bIL309  
160 *Listeria innocua* pLI100-P  
161 *Cyanidium caldarium* chloroplast  
162 *Lactococcus* phage BK5-T  
1801750-1804750  
184 *Pasteurella haemolytica*  
190 *Legionella pneumophila*  
193 *Pasteurella aerogenes*  
197 *Microcystis aeruginosa*  
199 *Mannheimia haemolytica*  
1809750-1813250  
187 *Lepidosiren paradoxa*-M  
187 *Lactobacillus gasseri*  
190 *Microcystis aeruginosa*  
198 *Legionella pneumophila*  
198 *Debaryomyces occidentalis*  
1878750-1880250  
194 *Microcystis aeruginosa*  
201 *Decumaria barbara*  
202 *Delarbrea michieana*  
203 *Microcystis aeruginosa*  
203 *Eucnide bartonioides*  
1899750-1900250  
310\* *Synechocystis* sp  
1923750-1926250  
173 *Lactococcus lactis* pNZ4000-P  
175 *Carnobacterium alterfunditum*  
175 *Prochlorococcus* sp  
181 *Lactobacillus lactis* pl-P  
181 *Lactococcus lactis* pK214-P  
1962250-1965750

156 *Prochlorococcus marinus*  
173 *Streptococcus thermophilus*  
174 *Streptococcus mutans*  
175 *Streptococcus pneumoniae*  
176 *Acinetobacter* sp SUN pIRAY-P  
1969750-1973750  
152 *Nicotiana tabacum*  
156 *Nicotiana glauca*  
160 *Lotus japonicus* Chr1  
161 *Lotus japonicus* Chr2  
162 *Cyprinodon macularius*  
2050250-2051750  
225 *Microcystis aeruginosa*  
227 *Smittium mucronatum*-A  
231 *Desulfitobacterium dehalogenans*  
235\* *Micrococcus lylae*  
2058250-2061750  
174 *Nostoc punctiforme*  
174 *Microcystis aeruginosa*  
182 *Nostoc* sp. pCC7120 pepsilon-P  
183 *Pasteurella aerogenes*  
183 *Nostoc* sp. PCC 7120  
2081750-2085750  
158 *Microcystis aeruginosa*  
159 *Nostoc* sp. pCC7120 pgamma-P  
161 *Nostoc* sp. pCC7120 pbeta-P  
161 *Nostoc punctiforme*  
163 *Anabaena* PCC7120  
2126250-2126750  
336\* *Barleria prionitis*  
2276750-2277750  
272\* *Pachysolen tannophilus*  
2325750-2328750  
145 *Streptococcus thermophilus*

151 Bacteriophage bIL309  
153 *Schizosaccharomyces pombe*  
154 *Listeria innocua* pLI100-P  
155 *Prochlorococcus marinus*  
2352250-2364250  
321\* *Penicillium funiculosum*  
2442750-2446750  
165 *Nicotiana tabacum*  
165 *Triticum aestivum*  
165 *Microcystis aeruginosa*  
166 *Psilotum nudum*  
166 *Psilotum nudum* chloroplast  
2520250-2521250  
223 *S cerevisiae* narnavirus  
225 *Streptococcus suis*  
226 *Caenorhabditis vulgare*  
227 *Candida albicans*  
227 *Candida dubliniensis*  
2754250-2759750  
143 Bacteriophage Tuc2009  
144 Bacteriophage bIL309  
145 *Microcystis aeruginosa*  
145 *Prochlorococcus marinus*  
146 *Streptococcus thermophilus*  
2772750-2773250  
311\* *Dendroctonus jeffreyi*  
2784750-2790750  
140 *Streptococcus mutans*  
142 *Francisella tularensis*  
147 *Lactobacillus helveticus* pLH1-P  
148 *Legionella longbeachae*  
2816750-2817750  
250\* *Pachysolen tannophilus*  
2999250-3000250

263\* *Synechocystis* sp  
3025250-3027250  
209 *Nostoc* sp. PCC 7120  
210 *Anabaena* PCC7120  
211 *Nostoc* sp. pCC7120 pbeta-P  
212 *Anabaena variabilis*  
213 *Microcystis aeruginosa*  
3032750-3042750  
135 *Vibrio cholerae* Chr2  
138 *Vibrio cholerae* Chr1  
138 Bacteriophage HK620  
147 Bacteriophage P22-pbi  
147 *Plectonema boryanum*  
3073250-3073750  
342\* Bacteriophage APSE-1  
3080750-3083750  
159 *Lactobacillus gasseri*  
172 *Lactobacillus* phage phi adh  
174 *Lactococcus* phage BK5-T  
177 Bacteriophage bIL286  
177 *Prochlorococcus marinus*  
3093750-3104750  
134 *Enterococcus faecalis*  
136 *Coxiella burnetii*  
141 *Coxiella burnetii* pQpRS-P  
147 *Coxiella burnetii* pQpDV-P  
149 *Coxiella burnetii* pQpH1-P  
3108750-3111750  
169 *Schizosaccharomyces pombe*  
169 *Listeria innocua* pLI100-P  
170 Bacteriophage bIL309  
171 *Streptococcus thermophilus*  
172 Bacteriophage bIL285  
3146750-3147750



307\* *Synechocystis* sp  
3400250-3404250  
158 *Microcystis aeruginosa*  
163 *Pasteurella aerogenes*  
164 *Nostoc punctiforme*  
164 *Pasteurella haemolytica*  
169 *Coxiella burnetii*  
3441750-3450750  
136 *Microcystis aeruginosa*

### ***Thermotoga maritima***

2250-4250  
255\* *Thermotoga maritima*  
318250-325250  
171 Shrimp white spot syndrome virus  
172 Shrimp white spot syndrome virus  
180 *Chlamydophila pneumoniae*  
182 *Thermococcus litoralis*  
185 *Chlamydia muridarum*  
408250-412250  
290\* *Solanum berthaultii*  
451250-456250  
168 *Encephalitozoon cuniculi* Chr2  
169 *Botryotinia fuckeliana*  
171 *Oculimacula yallundae*  
172 *Encephalitozoon cuniculi* Chr9  
626250-629750  
248\* *Thermotoga* sp FjSS3-B.1  
634250-634750  
323\* *Thermotoga* sp FjSS3-B.1  
647250-667250  
145 *S cerevisiae* narnavirus  
155 *Saccharomyces bayanus*

152 *Enterococcus faecalis*  
156 *Legionella pneumophila*  
160 *Coxiella burnetii*  
162 *Coxiella burnetii* pQpRS-P  
3483750-3488750  
155 *Lactococcus lactis*  
158 Bacteriophage bIL309  
159 *Lactobacillus gasseri*  
163 Bacteriophage bIL285

156 *Caenorhabditis briggsae*  
158 *Enterococcus hirae*  
159 *Enterococcus faecium*  
671250-673750  
219 *Thermotoga* sp FjSS3-B.1  
222 *Thermotoga neapolitana*  
260\* *Thermotoga maritima*  
779250-783750  
193 *Caenorhabditis briggsae*  
221 *Caenorhabditis vulgarensis*  
231 *Bacillus subtilis* p1414-P  
232 *Enterococcus hirae*  
233 *S thermophilus* pER35-P  
967250-968250  
250\* *Thermotoga maritima*  
971250-976750  
154 *Chlamydophila pneumoniae*  
161 *Pichia pastoris*  
162 *Pichia acaciae*  
164 *Chlamydia trachomatis*  
167 Shrimp white spot syndrome virus  
987750-988750

164 *Oenococcus oeni*  
3511250-3514750  
154 *Triticum aestivum*  
155 *Nicotiana tabacum*  
156 *Nicotiana glauca*  
161 *Zea mays*  
162 *Oryza sativa*

258\* *Thermotoga maritima*  
1010750-1017750  
176 *Streptococcus mitis*  
176 *Chlamydia trachomatis*  
177 *Kluyveromyces fragilis*  
178 Shrimp white spot syndrome virus  
178 Shrimp white spot syndrome virus  
1078750-1084250  
163 *Pichia pastoris*  
163 *Pichia acaciae*  
164 Shrimp white spot syndrome virus  
165 Shrimp white spot syndrome virus  
166 Banana streak virus  
1194750-1195750  
314\* *Thermotoga maritima*  
1203250-1207250  
182 *Chlamydia muridarum* pMoPn-P  
190 *Chlamydia trachomatis* pCHL1-P  
191 *Fagopyrum esculentum*  
194 *Chlamydia trachomatis* pl-P  
194 *Cucurbita moschata*  
1219250-1219750

|                                          |                                          |                                       |
|------------------------------------------|------------------------------------------|---------------------------------------|
| 336* <i>Fagus sylvatica</i>              | 1348750-1357250                          | 1722750-1729750                       |
| 1310250-1313250                          | 200 Strawberry vein banding virus        | 162 <i>Oryza sativa</i>               |
| 200 <i>Caenorhabditis briggsae</i>       | 201 Shrimp white spot syndrome virus     | 164 <i>Chlamydia muridarum</i>        |
| 210 <i>Caenorhabditis vulgaris</i>       | 201 <i>Chlamydophila pneumoniae</i> AR39 | 166 Shrimp white spot syndrome virus  |
| 214 <i>Enterococcus hirae</i>            | 202 <i>Chlamydia pneumoniae</i> J138     | 167 <i>Zea mays</i>                   |
| 215 <i>Streptococcus constellatus</i>    | 202 <i>Chlamydia pneumoniae</i> TW-183   | 167 Shrimp white spot syndrome virus  |
| 216 <i>Enterococcus faecium</i>          | 1359250-1361250                          | 1764750-1767250                       |
| 1324250-1338750                          | 242* <i>Thermococcus</i> sp              | 241* <i>Leptospira biflexa</i>        |
| 173 Shrimp white spot syndrome virus     | 1421250-1427250                          | 1769750-1774250                       |
| 174 Shrimp white spot syndrome virus     | 197 <i>Thermotoga maritima</i>           | 211 <i>Thermotoga maritima</i>        |
| 179 <i>Chlamydia trachomatis</i>         | 222 <i>Leptospira biflexa</i>            | 262* <i>Thermotoga neapolitana</i>    |
| 181 <i>Chlamydophila pneumoniae</i> AR39 | 228 <i>Caenorhabditis briggsae</i>       | 1779750-1782250                       |
| 181 <i>Chlamydia pneumoniae</i> J138     | 235* <i>Chlamydia trachomatis</i>        | 256* Shrimp white spot syndrome virus |
| 1340250-1344250                          | 1577250-1579250                          | 1787750-1790250                       |
| 205 <i>Thermotoga maritima</i>           | 230 <i>Pichia pastoris</i>               | 227 <i>Thermotoga maritima</i>        |
| 212 Shrimp white spot syndrome virus     | 234 <i>Botryotinia fuckeliana</i>        | 267* <i>Thermotoga neapolitana</i>    |
| 213 Shrimp white spot syndrome virus     | 237* <i>Lentinula edodes</i>             |                                       |
| 218 <i>Leptospira biflexa</i>            | 1622250-1626750                          |                                       |
| 220 Banana streak virus                  | 255* <i>Thermotoga maritima</i>          |                                       |
