# Supplementary material
Source: PubMed Central journal article supplement (PMC546175)
Supplement: nar_33_1_e6__2.pdf [file nar_33_1_e6__2.pdf]

## Annex 2 : Potential donors for every RNA-free atypical region (*Bacillus subtilis*)

### Host *Bacillus subtilis* signature

| Position (Kb)<br>Distance from host (AU) | Signature of original region | Signature of 1st potential donor | potential donors<br>sequence length                                                                                                                                                                                                    | Distance from outlier (AU)      | Position (Kb)<br>Distance from host (AU) | Signature of original region | Signature of 1st potential donor | potential donors<br>sequence length                                                                                                                                                                                                    | Distance from outlier (AU)      |
|------------------------------------------|------------------------------|----------------------------------|----------------------------------------------------------------------------------------------------------------------------------------------------------------------------------------------------------------------------------------|---------------------------------|------------------------------------------|------------------------------|----------------------------------|----------------------------------------------------------------------------------------------------------------------------------------------------------------------------------------------------------------------------------------|---------------------------------|
| 118.251-121.750<br>272                   |                              |                                  | <i>Streptococcus bovis</i><br>16231 nt<br><i>Bacillus megaterium</i><br>84488 nt<br><i>Streptococcus dysgalactiae</i><br>26360 nt<br><i>Streptococcus equisimilis</i><br>3726 nt<br><i>Lactococcus lactis</i> pHP003<br>13433 nt       | 208<br>213<br>213<br>217<br>227 | 769.751-777.250<br>220                   |                              |                                  | <i>Bacillus licheniformis</i><br>213502 nt<br><i>Chlorobium limicola</i> pl<br>14636 nt<br><i>Bacillus circulans</i><br>45030 nt<br><i>Bacillus thermosporans</i><br>14621 nt<br><i>Salmonella typhimurium</i> pSC101<br>9263 nt       | 175<br>175<br>179<br>187<br>189 |
| 123.751-144.70<br>219                    |                              |                                  | <i>Enterococcus seriolicida</i><br>4782 nt<br><i>Bacillus</i> sp. C-125<br>3003 nt<br><i>Vibrio harveyi</i><br>31726 nt<br><i>Bacillus pseudofirmus</i><br>21822 nt<br><i>Streptococcus bovis</i><br>16231 nt                          | 150<br>153<br>153<br>157<br>166 | 818.251-822.250<br>426                   |                              |                                  | <i>Bacillus anthracis</i> pPX01<br>181654 nt<br><i>Cyanidium caldarium</i><br>5315 nt<br><i>Nephroselmis olivacea</i> mit<br>45223 nt<br><i>prochlorococcus marinus</i><br>1751080 nt<br><i>Bacillus anthracis</i> pl pXO2<br>96231 nt | 145<br>153<br>159<br>159<br>160 |
| 203.251-207.750<br>250                   |                              |                                  | <i>Enterococcus faecium</i><br>103625 nt<br><i>Bacillus mojavensis</i><br>84488 nt<br><i>Vibrio anguillarum</i><br>38571 nt<br><i>Legionella longbeachae</i><br>13679 nt<br><i>Streptococcus uberis</i><br>8887 nt                     | 136<br>140<br>143<br>148<br>149 | 1125.751-1129.250<br>311                 |                              |                                  | <i>Bacteriophage SPBc2</i><br>134416 nt<br><i>S.pombe</i> chromosome I<br>5570797 nt<br><i>Bacillus cereus</i><br>5411809 nt<br><i>S. aureus</i> phage phi12<br>44970 nt<br><i>Hemorrhagic enteritis</i> virus<br>26263 nt             | 138<br>139<br>144<br>144<br>148 |
| 209.251-209.750<br>337                   |                              |                                  | <i>Clostridium cellulolyticum</i><br>21468 nt<br><br><i>no credible donor<br/>distance too great</i>                                                                                                                                   | 297                             | 1144.751-1145.750<br>357                 |                              |                                  | <i>Pantoea citrea</i> pUCDS000<br>5229 nt<br><br><i>no credible donor<br/>distance too great</i>                                                                                                                                       | 350                             |
| 211.251-218.750<br>198                   |                              |                                  | <i>Enterococcus faecium</i><br>103625 nt<br><i>Saccharomyces pastorianus</i><br>13908 nt<br><i>Streptococcus suis</i><br>114158 nt<br><i>S cerevisiae</i> chr4<br>1531929 nt<br><i>Legionella pneumophila</i><br>232469 nt             | 104<br>115<br>118<br>119<br>124 | 1277.751-1278.750<br>307                 |                              |                                  | <i>Bacillus pumilus</i> pPL10<br>7028 nt<br><i>Arabidopsis thaliana</i> chr1<br>29640317 nt<br><i>Brassica napus</i><br>265229 nt<br><i>Arabidopsis lyrata</i><br>17162 nt<br><i>S.pombe</i> chromosome I<br>5570797 nt                | 211<br>227<br>229<br>230<br>232 |
| 379.751-387.750<br>227                   |                              |                                  | <i>Bacillus licheniformis</i><br>213502 nt<br><i>Brevibacillus brevis</i><br>72621 nt<br><i>Paenibacillus azotofixans</i><br>10674 nt<br><i>Bacteriophage</i> HK97<br>39732 nt<br><i>Bacillus</i> sp. BP23<br>12980 nt                 | 187<br>197<br>198<br>201<br>203 | 1280.251-1280.750<br>464                 |                              |                                  | <i>Fagopyrum esculentum</i><br>7718 nt<br><br><i>no credible donor<br/>distance too great</i>                                                                                                                                          | 344                             |
| 392.751-398.750<br>226                   |                              |                                  | <i>Bacillus licheniformis</i><br>213502 nt<br><i>Bacillus circulans</i><br>45030 nt<br><i>Paenibacillus azotofixans</i><br>10674 nt<br><i>Brevibacillus brevis</i><br>72621 nt<br><i>Heliobacillus mobilis</i><br>35704 nt             | 166<br>191<br>195<br>203<br>206 | 1441.751-1447.250<br>255                 |                              |                                  | <i>Bacillus megaterium</i><br>84488 nt<br><i>Bacillus cereus</i><br>5411809 nt<br><i>Bacillus mojavensis</i><br>8433 nt<br><i>Staphylococcus intermedius</i><br>11525 nt<br><i>S.pombe</i> chromosome I<br>5570797 nt                  | 119<br>123<br>125<br>128<br>129 |
| 652.251-664.250<br>280                   |                              |                                  | <i>Listeria innocua</i> pLI100<br>81905 nt<br><i>Streptococcus thermophilus</i><br>246918 nt<br><i>Bacillus anthracis</i><br>5227293 nt<br><i>Bacteriophage</i> SPBc2<br>134416 nt<br><i>S.pombe</i> chromosome I<br>5570797 nt        | 93<br>103<br>104<br>104<br>105  | 1478.251-1483.250<br>289                 |                              |                                  | <i>Bacteriophage</i> SPBc2<br>134416 nt<br><i>Bacillus cereus</i><br>5411809 nt<br><i>Bacillus mojavensis</i><br>8433 nt<br><i>Bacillus anthracis</i><br>5227293 nt<br><i>S.pombe</i> chromosome I<br>5570797 nt                       | 116<br>116<br>118<br>121<br>123 |
| 738.751-747.250<br>349                   |                              |                                  | <i>Bacteriophage</i> SPBc2<br>134416 nt<br><i>Streptococcus agalactiae</i><br>27337 nt<br><i>Bacillus anthracis</i> pXO2<br>96231 nt<br><i>Staphylococcus aureus</i> phiPV83<br>45636 nt<br><i>Listeria innocua</i> pLI100<br>81905 nt | 111<br>120<br>120<br>122<br>124 | 1529.751-1530.250<br>390                 |                              |                                  | <i>Tetragenococcus halophilus</i><br>21728 nt<br><br><i>no credible donor<br/>distance too great</i>                                                                                                                                   | 333                             |

|                          |  |  |                                                                                                                                                                                                                                           |                          |  |  |                                                                                                                                                                                                                                         |
|--------------------------|--|--|-------------------------------------------------------------------------------------------------------------------------------------------------------------------------------------------------------------------------------------------|--------------------------|--|--|-----------------------------------------------------------------------------------------------------------------------------------------------------------------------------------------------------------------------------------------|
| 1878.751-1893.250<br>295 |  |  | <i>Bacteriophage SPBc2</i> 134416 nt 93<br><i>Listeria innocua</i> pLI100 81905 nt 106<br><i>Bacillus cereus</i> 5411809 nt 109<br><i>Bacillus anthracis</i> 5227293 nt 110<br><i>Legionella longbeachae</i> 13679 nt 110                 | 2552.751-2553.750<br>245 |  |  | <i>Bacillus subtilis</i> 4214814 nt 235<br><br><b>no credible donor distance too great</b>                                                                                                                                              |
| 1897.751-1905.250<br>267 |  |  | <i>Listeria innocua</i> pLI100 81905 nt 133<br><i>S.pombe chromosome I</i> 5570797 nt 134<br><i>Bacillus mojavensis</i> 8433 nt 136<br><i>African swine fever virus</i> 170101 nt 141<br><i>Bacteriophage PSA</i> 37618 nt 141            | 2585.251-2586.250<br>261 |  |  | <i>Bacteroides fragilis</i> 274211 nt 240<br><br><b>no credible donor distance too great</b>                                                                                                                                            |
| 1923.251-1924.250<br>258 |  |  | <i>Bacillus subtilis</i> pTA1060 8737 nt 194<br><i>Bacillus subtilis</i> pTA1040 7837 nt 206<br><i>Bacillus subtilis</i> pl p1414 7949 nt 210<br><i>Bacillus pumilus</i> pPL10 7028 nt 211<br><i>Coxiella burnetii</i> pQpH1 37329 nt 218 | 2653.751-2667.250<br>247 |  |  | <i>S.pombe chromosome I</i> 5570797 nt 94<br><i>Bacillus megaterium</i> 84488 nt 97<br><i>Bacteriophage SPBc2</i> 134416 nt 99<br><i>Bacillus mojavensis</i> 8433 nt 101<br><i>Listeria innocua</i> pLI100 81905 nt 104                 |
| 1939.251-1939.750<br>378 |  |  | <i>Ciona intestinalis</i> 238900 nt 315<br><br><b>no credible donor distance too great</b>                                                                                                                                                | 2675.251-2676.250<br>259 |  |  | <i>Bacillus pseudofirmus</i> 21822 nt 234<br><br><b>no credible donor distance too great</b>                                                                                                                                            |
| 1977.751-1978.250<br>448 |  |  | <i>Paenibacillus macerans</i> 18635 nt 357<br><br><b>no credible donor distance too great</b>                                                                                                                                             | 2683.751-2693.750<br>214 |  |  | <i>S cerevisiae chr4</i> 1531929 nt 123<br><i>Enterococcus faecium</i> 103625 nt 125<br><i>Enterococcus hirae</i> 57921 nt 135<br><i>Bacillus megaterium</i> 84488 nt 138<br><i>Streptococcus mutans</i> 1916111 nt 139                 |
| 2029.251-2029.750<br>356 |  |  | <i>Commelina yellow mottle virus</i> 7489 nt 330<br><br><b>no credible donor distance too great</b>                                                                                                                                       | 2696.251-2701.250<br>250 |  |  | <i>Bacillus megaterium</i> 84488 nt 137<br><i>S.pombe chromosome I</i> 5570797 nt 140<br><i>Streptococcus mutans</i> 1916111 nt 144<br><i>Bacillus pumilus</i> pPL10 7028 nt 146<br><i>Enterococcus faecium</i> 103625 nt 147           |
| 2033.751-2034.750<br>301 |  |  | <i>A actinomycetemcomitans</i> 215048 nt 211<br><i>Enterococcus faecalis</i> 213693 nt 217<br><i>Bacillus subtilis</i> pTA1060 8737 nt 217<br><i>Bacillus pumilus</i> pPL10 7028 nt 219<br><i>Coxiella burnetii</i> plasmid 39280 nt 220  | 2705.751-2740.250<br>242 |  |  | <i>Listeria innocua</i> pLI100 81905 nt 96<br><i>S.pombe chromosome I</i> 5570797 nt 99<br><i>Bacteriophage SPBc2</i> 134416 nt 102<br><i>Bacillus mojavensis</i> 8433 nt 104<br><i>Legionella longbeachae</i> 13679 nt 109             |
| 2036.251-2042.250<br>206 |  |  | <i>Enterococcus faecium</i> 103625 nt 121<br><i>Enterococcus faecalis</i> 213693 nt 137<br><i>S cerevisiae chr4</i> 1531929 nt 138<br><i>Saccharomyces pastorianus</i> 13908 nt 143<br><i>Bacillus megaterium</i> 84488 nt 144            | 2742.251-2746.750<br>215 |  |  | <i>Enterococcus faecium</i> 103625 nt 124<br><i>Bacteroides fragilis</i> 274211 nt 145<br><i>Streptococcus suis</i> 114158 nt 149<br><i>Butyrivibrio fibrisolvens</i> 11839 nt 149<br><i>Legionella pneumophila</i> 232469 nt 150       |
| 2047.251-2075.250<br>290 |  |  | <i>Bacteriophage SPBc2</i> 134416 nt 74<br><i>Listeria innocua</i> pLI100 81905 nt 78<br><i>S.pombe chromosome I</i> 5570797 nt 96<br><i>Bacillus anthracis</i> 5227293 nt 98<br><i>Streptococcus agalactiae</i> 272377 nt 100            | 2765.751-2768.250<br>265 |  |  | <i>A actinomycetemcomitans</i> 215048 nt 169<br><i>Coxiella burnetii</i> 76698 nt 176<br><i>haemophilus influenzae</i> 1830140 nt 177<br><i>Legionella pneumophila</i> 232469 nt 181<br><i>Pasteurella multocida</i> 2257487 nt 181     |
| 2097.251-2097.750<br>381 |  |  | <i>Bacteriophage phi-105</i> 39325 nt 361<br><br><b>no credible donor distance too great</b>                                                                                                                                              | 3252.751-3257.250<br>301 |  |  | <i>Bacillus anthracis</i> 5227293 nt 122<br><i>Listeria innocua</i> pLI100 81905 nt 134<br><i>Bacillus anthracis</i> pl pXO2 96231 nt 135<br><i>Bacteriophage SPBc2</i> 134416 nt 139<br><i>Bacillus anthracis</i> pIPX01 181654 nt 139 |
| 2150.751-2285.750<br>298 |  |  | <i>Bacteriophage SPBc2</i> 134416 nt 2<br><i>S.pombe chromosome I</i> 5570797 nt 93<br><i>Streptococcus thermophilus</i> 246918 nt 98<br><i>Listeria innocua</i> pLI100 81905 nt 100<br><i>S. aureus phage phi12</i> 44970 nt 102         | 3281.251-3285.750<br>247 |  |  | <i>Paenibacillus azotofixans</i> 10674 nt 193<br><i>Bacteriophage HK97</i> 39732 nt 198<br><i>C. glutamicum</i> pCG4 29371 nt 202<br><i>Bacteriophage HK022</i> 40751 nt 203<br><i>Bacillus</i> sp. BP23 12980 nt 205                   |

|                       |                                                                                          |                                                                                   |                                                                                                                                                                                                                                                  |                                 |                       |                                                                                          |                                                                                     |                                                                                                                                                                                                                                   |                                 |
|-----------------------|------------------------------------------------------------------------------------------|-----------------------------------------------------------------------------------|--------------------------------------------------------------------------------------------------------------------------------------------------------------------------------------------------------------------------------------------------|---------------------------------|-----------------------|------------------------------------------------------------------------------------------|-------------------------------------------------------------------------------------|-----------------------------------------------------------------------------------------------------------------------------------------------------------------------------------------------------------------------------------|---------------------------------|
| 3337.251-<br>3337.750 | 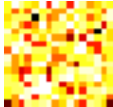<br>375 |  | <i>Erwinia amylovora</i> pEA29<br>28185 nt<br><br>no credible donor<br>distance too great                                                                                                                                                        | 346                             | 4019.751-<br>4020.250 | <br>392 |  | <i>Bacillus</i> sp. RC607<br>7029 nt<br><br>no credible donor<br>distance too great                                                                                                                                               | 317                             |
| 3462.251-<br>3467.250 | <br>368 |  | <i>Bacillus anthracis</i> pIPX01<br>181654 nt<br><i>Lactococcus lactis</i> pNZ4000<br>42810 nt<br><i>Cucumis sativus</i><br>38373 nt<br><i>Anthonomus grandis</i><br>10017 nt<br><i>Carnobacterium piscicola</i><br>29431 nt                     | 142<br>148<br>151<br>152<br>152 | 4122.751-<br>4134.250 | <br>362 |  | <i>Bacillus anthracis</i> pIPX01<br>181654 nt<br><i>Bacillus anthracis</i> pl pXO2<br>96231 nt<br><i>Bacillus anthracis</i><br>5227293 nt<br><i>Bacteriophage</i> bLL312<br>15179 nt<br><i>Cucumis sativus</i><br>38373 nt        | 96<br>114<br>116<br>127<br>128  |
| 3658.751-<br>3661.750 | <br>260 |  | <i>Streptococcus intermedius</i><br>16249 nt<br><i>Bacteriophage</i> Tuc2009<br>38347 nt<br><i>Gardnerella vaginalis</i><br>4590 nt<br><i>Tetragenococcus halophilus</i><br>21728 nt<br><i>Enterococcus faecium</i><br>103625 nt                 | 161<br>168<br>171<br>171<br>175 | 4171.251-<br>4176.750 | <br>418 |  | <i>Bacillus anthracis</i> pIPX01<br>181654 nt<br><i>C. acetobutylicump</i> SOLI<br>192060 nt<br><i>Staphylococcus hominis</i><br>24362 nt<br><i>Porphyra purpurea</i> mit<br>36753 nt<br><i>Brochothrix campestris</i><br>4357 nt | 117<br>121<br>127<br>132<br>133 |
| 3663.751-<br>3683.750 | <br>317 |  | <i>Lactococcus lactis</i> pNZ4000<br>42810 nt<br><i>Lactobacillus lactis</i> pl<br>29871 nt<br><i>Lactococcus lactis</i> pl pK214<br>29871 nt<br><i>Lactococcus lactis</i> pl pAH82<br>20331 nt<br><i>Bacillus anthracis</i> pl pXO2<br>96231 nt | 103<br>108<br>108<br>114<br>115 | 4183.751-<br>4189.250 | <br>277 |  | <i>Listeria innocua</i> pLI100<br>81905 nt<br><i>S cerevisiae</i> chr4<br>1531929 nt<br><i>Streptococcus thermophilus</i><br>246918 nt<br><i>S.pombe</i> chromosome I<br>5570797 nt<br><i>Bacteriophage</i> SPBc2<br>134416 nt    | 121<br>133<br>134<br>134<br>136 |
| 3712.251-<br>3716.750 | <br>291 |  | <i>Bacillus subtilis</i> pTA1060<br>8737 nt<br><i>Bacillus pumilus</i> pPL10<br>7028 nt<br><i>Bacillus subtilis</i> pTA1040<br>7837 nt<br><i>S. aureus</i> pUB110<br>4548 nt<br><i>S. thermophilus</i> pER35<br>9531 nt                          | 189<br>190<br>195<br>204<br>210 |                       |                                                                                          |                                                                                     |                                                                                                                                                                                                                                   |                                 |
