# Supplementary material
Source: PubMed Central journal article supplement (PMC546175)
Supplement: nar_33_1_e6__3.pdf [file nar_33_1_e6__3.pdf]

**Annex 3:** Gene-based comparison of horizontal gene transfers as reported by Garcia Vallve *et al.* [16], Nicolas *et al* [12], Nakamura *et al* [14], Moszer *et al* [51] and this work (TW, threshold 99 %) for *B subtilis*. Columns are self-explanatory. A star indicates a detected gene. Yellow indicates genes detected by our approach and at least another method, green indicates gene detected only by our approach, red indicates gene found by all methods except our approach, NF = no feature found in GIB database.

| <i>Bacillus</i> | <i>subtilis</i> | gene  | Ref 16 | Ref 12 | Ref 14 | Ref 51 | TW |
|-----------------|-----------------|-------|--------|--------|--------|--------|----|
| begin           | end             | gene  |        |        |        |        |    |
| 23144           | 23767           | yaaG  |        |        | *      |        |    |
| 35529           | 35723           | csfB  |        |        | *      |        |    |
| 35843           | 36457           | xpaC  |        |        | *      | *      |    |
| 40211           | 40651           | yaaR  | *      |        |        |        |    |
| 40663           | 41652           | holB  |        |        | *      |        |    |
| 52761           | 53021           | veg   |        |        |        | *      |    |
| 68513           | 69148           | yabQ  | *      |        | *      |        |    |
| 87398           | 87607           | yazB  |        |        |        | *      |    |
| 88724           | 90223           | lysS  |        |        |        |        | *  |
| 101446          | 101910          | ctsR  | *      |        |        | *      | *  |
| 101924          | 102481          | yacH  |        |        | *      | *      |    |
| 117346          | 117495          | rpmGB |        |        |        | *      |    |
| 117529          | 117708          | secE  |        |        |        |        | *  |
| 117887          | 118420          | nusG  |        |        |        |        | *  |
| 118588          | 119013          | rplK  |        |        |        |        | *  |
| 119107          | 119805          | rplA  |        |        |        |        | *  |
| 120057          | 120557          | rplJ  |        |        |        |        | *  |
| 120604          | 120975          | rplL  |        |        |        |        | *  |
| 121065          | 121670          | ybxB  |        | *      |        | *      | *  |
| 121916          | 125497          | rpoB  |        |        |        |        | *  |
| 125559          | 129158          | rpoC  |        |        |        |        | *  |
| 129339          | 129587          | ybxF  |        |        |        |        | *  |
| 129701          | 130117          | rpsL  |        | *      |        | *      | *  |
| 130159          | 130629          | rpsG  |        |        |        |        | *  |
| 130683          | 132761          | fusA  |        |        |        |        | *  |
| 132881          | 134071          | tufA  |        |        |        |        | *  |
| 134170          | 135126          | ybaC  |        | *      |        | *      | *  |
| 135362          | 135670          | rpsJ  |        |        |        |        | *  |
| 135710          | 136339          | rplC  |        |        |        |        | *  |
| 136367          | 136990          | rplD  |        |        |        |        | *  |
| 136990          | 137277          | rplW  |        |        |        |        | *  |
| 137309          | 138142          | rplB  |        |        |        |        | *  |
| 138200          | 138478          | rpsS  |        | *      |        | *      | *  |
| 138495          | 138836          | rplV  |        |        |        |        | *  |
| 138840          | 139496          | rpsC  |        |        |        |        | *  |
| 139498          | 139932          | rplP  |        |        |        |        | *  |
| 139922          | 140122          | rpmC  |        |        |        |        | *  |

| <i>Bacillus</i> | <i>subtilis</i> | gene | Ref 16 | Ref 12 | Ref 14 | Ref 51 | TW |
|-----------------|-----------------|------|--------|--------|--------|--------|----|
| begin           | end             |      |        |        |        |        |    |
| 140145          | 140408          | rpsQ |        |        |        |        | *  |
| 140449          | 140817          | rplN |        |        |        |        | *  |
| 140855          | 141166          | rplX |        |        |        |        | *  |
| 141193          | 141732          | rplE |        |        |        |        | *  |
| 141755          | 141940          | rpsN |        |        |        |        | *  |
| 141972          | 142370          | rpsH |        |        |        |        | *  |
| 142400          | 142939          | rplF |        |        |        |        | *  |
| 142972          | 143334          | rplR |        |        |        |        | *  |
| 143359          | 143859          | rpsE |        |        |        |        | *  |
| 143873          | 144052          | rpmD |        |        |        |        | *  |
| 144083          | 144523          | rplO |        |        |        |        | *  |
| 147835          | 147948          | rpmJ |        |        | *      | *      |    |
| 155155          | 155922          | ybaJ |        |        |        | *      | *  |
| 156108          | 156551          | ybaK |        |        |        | *      | *  |
| 202112          | 202252          | ybbU | *      | *      |        |        |    |
| 202533          | 203444          | alkA | *      | *      | *      | *      | *  |
| 203715          | 204350          | adaA | *      | *      | *      | *      | *  |
| 204337          | 204876          | adaB |        | *      |        | *      | *  |
| 205395          | 206912          | ndhF | *      | *      | *      | *      | *  |
| 206927          | 207169          | ybcC | *      | *      |        | *      | *  |
| 207166          | 209430          | ybcD |        | *      | *      | *      | *  |
| 209619          | 210146          | ybcF | *      | *      | *      | *      | *  |
| 210210          | 210500          | ybcH | *      | *      | *      | *      | *  |
| 210558          | 210932          | ybcI | *      | *      | *      | *      | *  |
| 213926          | 214093          | ybcO | *      | *      |        | *      | *  |
| 214160          | 214549          | ybcP | *      | *      | *      | *      | *  |
| 215390          | 215947          | ybcS | *      | *      | *      | *      | *  |
| 215944          | 216879          | ybcT | *      | *      | *      | *      | *  |
| 216898          | 217617          | ybdA |        | *      | *      | *      | *  |
| 217682          | 219028          | ybdB | *      | *      | *      | *      | *  |
| 219075          | 219488          | ybdD | *      | *      |        | *      | *  |
| 219594          | 220019          | ybdE | *      | *      | *      | *      | *  |
| 220265          | 221155          | ybdG | *      | *      |        | *      | *  |
| 222971          | 223165          | ybdL |        |        | *      |        |    |
| 235614          | 235862          | ybeF |        |        | *      |        |    |
| 238153          | 238437          | ybfE |        |        | *      |        |    |
| 238633          | 239544          | ybfF |        |        | *      | *      |    |
| 266711          | 267655          | ycbB | *      |        |        |        |    |
| 267882          | 268808          | ycbC | *      |        |        |        |    |
| 268838          | 270304          | ycbD | *      |        |        |        |    |
| 271792          | 273159          | ycbF | *      |        |        |        |    |
| 273229          | 273930          | ycbG | *      |        |        |        |    |
| 274021          | 275553          | ycbH | *      |        |        |        |    |
| 275830          | 276750          | ycbJ | *      |        |        |        |    |
| 282011          | 282439          | cwlJ |        |        | *      |        |    |
| 333653          | 334120          | ycgE |        |        | *      |        |    |

| <i>Bacillus</i> | <i>subtilis</i> | gene  | Ref 16 | Ref 12 | Ref 14 | Ref 51 | TW |
|-----------------|-----------------|-------|--------|--------|--------|--------|----|
| begin           | end             |       |        |        |        |        |    |
| 336986          | 337720          | ycgI  |        |        | *      |        |    |
| 352430          | 353440          | ycgT  | *      |        |        |        |    |
| 353472          | 354923          | nasF  | *      |        |        |        |    |
| 354984          | 355304          | nasE  | *      |        |        |        |    |
| 355336          | 357753          | nasD  | *      |        |        |        |    |
| 357875          | 360007          | nasC  | *      |        |        |        |    |
| 360014          | 362326          | nasB  | *      |        |        |        |    |
| 362506          | 363771          | nasA  | *      |        | *      |        |    |
| 371725          | 372036          | nucA  | *      |        |        |        |    |
| 376525          | 387291          | srfAA |        |        |        |        | *  |
| 387304          | 398067          | srfAB |        |        |        |        | *  |
| 390452          | 390592          | comS  |        |        | *      |        |    |
| 398104          | 401928          | srfAC |        |        |        |        | *  |
| 404042          | 404599          | ycxB  | *      |        | *      | *      |    |
| 454908          | 455420          | ycsD  |        |        | *      |        |    |
| 490284          | 490574          | ydaQ  |        |        | *      |        |    |
| 524049          | 524342          | ydcF  |        |        | *      |        |    |
| 527860          | 528312          | ydcK  |        |        | *      |        |    |
| 529236          | 530342          | ydcL  | *      | *      | *      | *      | *  |
| 530355          | 530864          | ydcM  | *      | *      | *      | *      | *  |
| 530861          | 531244          | ydcN  | *      | *      |        | *      | *  |
| 531518          | 531712          | sacV  | *      | *      | *      | *      | *  |
| 532023          | 532283          | ydcO  | *      | *      |        | *      | *  |
| 532653          | 533033          | ydcP  | *      | *      | *      | *      | *  |
| 533069          | 534511          | ydcQ  | *      | *      |        | *      | *  |
| 534504          | 535562          | ydcR  | *      | *      | *      | *      | *  |
| 535827          | 536096          | ydcS  | *      | *      |        | *      | *  |
| 536418          | 536726          | yddA  | *      | *      | *      | *      | *  |
| 536716          | 537780          | yddB  | *      | *      |        | *      | *  |
| 537492          | 537740          | yddC  |        | *      |        | *      | *  |
| 538053          | 538577          | yddD  | *      | *      | *      | *      | *  |
| 538465          | 540960          | yddE  | *      | *      |        | *      | *  |
| 540979          | 541305          | yddF  | *      | *      | *      | *      | *  |
| 541309          | 543756          | yddG  | *      | *      |        | *      | *  |
| 543753          | 544742          | yddH  | *      | *      |        | *      | *  |
| 544757          | 545263          | yddI  | *      | *      | *      | *      | *  |
| 545326          | 545706          | yddJ  | *      | *      |        | *      | *  |
| 545897          | 546697          | yddK  | *      | *      | *      | *      | *  |
| 547037          | 548212          | rapI  | *      | *      | *      | *      | *  |
| 548169          | 548288          | phrI  | *      | *      | *      | *      | *  |
| 548441          | 549382          | yddM  | *      | *      | *      | *      | *  |
| 549953          | 550972          | yddN  | *      | *      |        | *      | *  |
| 551232          | 551642          | lrpA  | *      | *      | *      | *      | *  |
| 551765          | 552214          | lrpB  | *      | *      | *      | *      | *  |
| 552159          | 552701          | yddQ  |        | *      |        | *      | *  |
| 553424          | 554188          | yddR  | *      | *      |        | *      | *  |

| <i>Bacillus</i> | <i>subtilis</i> | gene | Ref 16 | Ref 12 | Ref 14 | Ref 51 | TW |
|-----------------|-----------------|------|--------|--------|--------|--------|----|
| begin           | end             |      |        |        |        |        |    |
| 554382          | 555692          | yddS |        | *      | *      | *      | *  |
| 556476          | 557162          | yddT | *      | *      | *      | *      | *  |
| 558122          | 558715          | ydeA | *      | *      | *      | *      | *  |
| 558618          | 558818          | cspC |        | *      |        |        | *  |
| 559865          | 560326          | ydeB | *      | *      | *      | *      | *  |
| 560894          | 561130          | ydzE | *      | *      | *      |        | *  |
| 561228          | 562103          | ydeC | *      | *      | *      | *      | *  |
| 562216          | 563175          | ydeD | *      | *      | *      | *      | *  |
| 563328          | 564200          | ydeE | *      | *      | *      | *      | *  |
| 564058          | 565455          | ydeF |        | *      |        | *      | *  |
| 565565          | 566857          | ydeG |        | *      |        | *      | *  |
| 567376          | 567822          | ydeH | *      | *      | *      | *      | *  |
| 568059          | 568652          | ydeI | *      | *      |        |        | *  |
| 568834          | 569493          | ydeJ |        |        |        | *      |    |
| 570085          | 570948          | ydeK | *      | *      |        |        |    |
| 570933          | 572324          | ydeL |        | *      |        |        |    |
| 572518          | 572943          | ydeM |        | *      |        | *      |    |
| 572996          | 573568          | ydeN |        | *      |        |        |    |
| 573820          | 574149          | ydzF |        | *      | *      | *      |    |
| 574234          | 575106          | ydeO |        | *      |        |        |    |
| 575256          | 575642          | ydeP |        | *      |        |        |    |
| 575753          | 576346          | ydeQ |        | *      |        |        |    |
| 576490          | 577677          | ydeR |        | *      |        |        |    |
| 578477          | 577881          | ydeS |        | *      |        |        |    |
| 579085          | 579420          | ydeT |        | *      | *      |        |    |
| 579433          | 580740          | ydfA |        | *      |        |        |    |
| 581238          | 582023          | ydfB |        | *      | *      | *      |    |
| 582080          | 583000          | ydfC |        | *      |        |        |    |
| 583133          | 584581          | ydfD |        | *      |        | *      |    |
| 584699          | 585322          | ydfE |        | *      | *      |        |    |
| 585412          | 586092          | ydfF |        | *      |        |        |    |
| 586172          | 586615          | ydfG |        | *      |        |        |    |
| 587288          | 588511          | ydfH |        | *      |        |        |    |
| 588504          | 589145          | ydfI |        | *      |        |        |    |
| 589261          | 591435          | ydfJ |        | *      |        |        |    |
| 591847          | 592749          | nap  |        | *      |        |        |    |
| 592951          | 593640          | ydfK |        | *      |        |        |    |
| 593730          | 594542          | ydfL |        | *      |        |        |    |
| 594653          | 595546          | ydfM |        | *      |        |        |    |
| 596022          | 596642          | ydfN |        | *      |        |        |    |
| 596658          | 597596          | ydfO |        | *      |        |        |    |
| 597698          | 598087          | ydfP |        | *      |        |        |    |
| 598443          | 598781          | ydfQ | *      | *      | *      | *      |    |
| 598821          | 599057          | ydzH | *      | *      | *      | *      |    |
| 599943          | 600620          | ydfR | *      | *      |        |        |    |
| 600733          | 601440          | ydfS | *      | *      |        |        |    |

| <i>Bacillus</i> | <i>subtilis</i> | gene  | Ref 16 | Ref 12 | Ref 14 | Ref 51 | TW |
|-----------------|-----------------|-------|--------|--------|--------|--------|----|
| begin           | end             |       |        |        |        |        |    |
| 601899          | 602141          | ydgA  | *      |        |        |        |    |
| 602155          | 602427          | ydgB  | *      |        |        | *      |    |
| 603140          | 603484          | ydgD  |        |        |        | *      |    |
| 641201          | 641677          | ydiB  |        |        |        | *      |    |
| 649781          | 651415          | groEL | *      | *      |        |        |    |
| 652979          | 653359          | ydiM  | *      | *      |        | *      | *  |
| 654695          | 654910          | ydiN  | *      | *      | *      | *      | *  |
| 654940          | 656223          | ydiO  | *      | *      | *      | *      | *  |
| 656245          | 657414          | ydiP  | *      | *      | *      | *      | *  |
| 657900          | 658088          | ydiQ  |        |        | *      |        | *  |
| 659340          | 660281          | ydiR  | *      | *      | *      | *      | *  |
| 660313          | 661344          | ydiS  | *      | *      | *      | *      | *  |
| 661347          | 662744          | ydjA  | *      | *      | *      | *      | *  |
| 663318          | 663653          | ydjB  | *      | *      | *      | *      | *  |
| 664036          | 664386          | ydjC  | *      |        |        | *      | *  |
| 679107          | 679478          | ydjM  | *      |        |        | *      |    |
| 680972          | 681181          | ydjO  |        |        | *      |        |    |
| 695704          | 696507          | yebC  |        |        | *      |        |    |
| 696666          | 696887          | yebD  |        |        | *      |        |    |
| 702075          | 702758          | purL  | *      |        |        |        |    |
| 702742          | 704970          | purQ  | *      |        |        |        |    |
| 704946          | 706376          | purF  | *      |        |        |        |    |
| 706478          | 707518          | purM  | *      |        |        |        |    |
| 707515          | 708102          | purN  | *      |        |        |        |    |
| 708099          | 709637          | purH  | *      |        |        |        |    |
| 709653          | 710921          | purD  | *      |        |        |        |    |
| 738501          | 739403          | yefB  | *      | *      | *      | *      | *  |
| 739342          | 739719          | yefC  | *      | *      | *      | *      | *  |
| 739794          | 742433          | yeeA  | *      | *      | *      | *      | *  |
| 742445          | 744241          | yeeB  | *      | *      |        | *      | *  |
| 744354          | 745502          | yeeC  | *      | *      | *      | *      | *  |
| 745764          | 746069          | yeeD  | *      | *      | *      | *      | *  |
| 746136          | 746342          | yezA  | *      | *      |        | *      | *  |
| 751916          | 752638          | yeeI  | *      |        |        |        |    |
| 752773          | 753909          | yeeK  |        |        | *      |        |    |
| 755415          | 755663          | cotJA |        |        | *      |        |    |
| 756619          | 757161          | yesJ  | *      |        |        |        |    |
| 757097          | 757486          | yesK  |        |        | *      |        |    |
| 761215          | 762453          | yesO  | *      |        |        |        |    |
| 764289          | 765323          | yesR  | *      |        |        |        |    |
| 765346          | 767631          | yesS  | *      |        |        |        |    |
| 767645          | 768343          | yesT  | *      |        |        |        |    |
| 768336          | 768998          | yesU  | *      |        |        |        |    |
| 769742          | 771604          | yesW  | *      |        |        |        | *  |
| 771650          | 773488          | yesX  | *      |        |        |        | *  |
| 773646          | 774299          | yesY  | *      |        |        |        | *  |

| <i>Bacillus</i> | <i>subtilis</i> | gene | Ref 16 | Ref 12 | Ref 14 | Ref 51 | TW |
|-----------------|-----------------|------|--------|--------|--------|--------|----|
| begin           | end             |      |        |        |        |        |    |
| 774307          | 776298          | yesZ | *      |        |        |        | *  |
| 776342          | 778915          | yetA | *      |        |        |        | *  |
| 785693          | 786778          | yetI |        |        | *      |        |    |
| 806599          | 808056          | yfmT | *      |        |        |        |    |
| 808070          | 808930          | yfmS | *      |        |        |        |    |
| 809065          | 810954          | yfmR | *      |        |        |        |    |
| 811077          | 811523          | yfmQ | *      |        |        |        |    |
| 811648          | 812070          | yfmP | *      |        |        |        |    |
| 812136          | 813326          | yfmO | *      |        |        |        |    |
| 813617          | 813772          | yfmN |        |        | *      |        |    |
| 813892          | 815448          | yfmM | *      |        |        |        |    |
| 815621          | 816751          | yfmL | *      |        |        |        |    |
| 817318          | 818337          | yfmJ | *      | *      |        |        | *  |
| 818648          | 819868          | yfmI | *      | *      | *      | *      | *  |
| 820066          | 820137          | yfmH | *      | *      |        |        | *  |
| 821667          | 820204          | yfmG | *      | *      | *      | *      | *  |
| 822240          | 823040          | yfmF |        |        |        |        | *  |
| 826180          | 826548          | yfmB |        |        |        | *      |    |
| 826760          | 826927          | yfmA |        |        | *      | *      |    |
| 843605          | 843742          | yflD |        |        | *      |        |    |
| 846789          | 846989          | yfkS |        |        | *      |        |    |
| 867514          | 867975          | yfkB | *      |        |        |        |    |
| 877105          | 877557          | yfjM | *      |        |        |        |    |
| 878508          | 879509          | acoA | *      |        |        |        |    |
| 879513          | 880541          | acoB | *      |        |        |        |    |
| 880555          | 881751          | acoC | *      |        |        |        |    |
| 881772          | 883148          | acoL | *      |        |        |        |    |
| 883264          | 885081          | acoR | *      |        |        |        |    |
| 885350          | 885679          | yfjF | *      |        |        |        |    |
| 937406          | 937660          | sspE |        |        | *      |        |    |
| 944671          | 945003          | ygaH |        |        | *      |        |    |
| 953625          | 953828          | ygzA |        |        |        | *      |    |
| 954397          | 955152          | ygaJ |        |        | *      |        |    |
| 979822          | 979977          | yhcD |        |        | *      | *      |    |
| 979982          | 980743          | yhcE |        |        | *      | *      |    |
| 987925          | 988380          | yhcM |        |        | *      |        |    |
| 988358          | 988927          | yhcN |        |        |        | *      |    |
| 1018452         | 1019483         | lytE |        |        | *      |        |    |
| 1034847         | 1034957         | yhdS |        |        | *      | *      |    |
| 1036433         | 1036789         | yhdU |        |        | *      |        |    |
| 1036786         | 1037181         | yhdV |        |        | *      |        |    |
| 1044517         | 1044678         | yheJ |        |        | *      |        |    |
| 1049281         | 1049406         | yheF |        |        | *      |        |    |
| 1055889         | 1056140         | yhaY |        |        | *      | *      |    |
| 1071796         | 1072035         | yhaJ |        |        | *      | *      |    |
| 1082343         | 1082657         | yhgB |        |        | *      |        |    |

| <i>Bacillus</i> | <i>subtilis</i> | gene | Ref 16 | Ref 12 | Ref 14 | Ref 51 | TW |
|-----------------|-----------------|------|--------|--------|--------|--------|----|
| begin           | end             |      |        |        |        |        |    |
| 1094213         | 1094416         | yhfD |        |        | *      |        |    |
| 1097592         | 1097732         | yhfH |        |        | *      |        |    |
| 1124595         | 1125800         | yhjI | *      |        | *      | *      |    |
| 1125872         | 1126924         | yhjJ | *      | *      | *      | *      | *  |
| 1126927         | 1127787         | yhjK | *      | *      | *      | *      | *  |
| 1127759         | 1129084         | yhjL | *      | *      | *      | *      | *  |
| 1129188         | 1130177         | yhjM | *      | *      | *      | *      | *  |
| 1134728         | 1135054         | yhjQ |        |        | *      |        |    |
| 1142882         | 1144057         | sbcD |        |        |        |        | *  |
| 1144054         | 1147446         | yirY |        |        |        |        | *  |
| 1150638         | 1151561         | yisJ |        |        | *      |        |    |
| 1158516         | 1158995         | yizA |        |        |        | *      |    |
| 1167024         | 1167665         | yisW | *      |        |        |        |    |
| 1185081         | 1185374         | yitR |        |        | *      |        |    |
| 1192090         | 1192302         | yitX |        |        | *      |        |    |
| 1229387         | 1230508         | yjbF |        |        | *      |        |    |
| 1241920         | 1242630         | tenA | *      |        |        |        |    |
| 1242605         | 1243222         | tenI | *      |        |        |        |    |
| 1243206         | 1244315         | yjbR | *      |        |        |        |    |
| 1244512         | 1245282         | yjbT | *      |        |        |        |    |
| 1245279         | 1246289         | yjbU | *      |        |        |        |    |
| 1246308         | 1247123         | yjbV | *      |        |        |        |    |
| 1248913         | 1249359         | cotZ |        |        | *      |        |    |
| 1251648         | 1252004         | yjcA | *      |        |        |        |    |
| 1252329         | 1252544         | yjcB |        |        | *      |        |    |
| 1255544         | 1255846         | yjcE |        |        | *      |        |    |
| 1260738         | 1261928         | yjcL |        |        |        |        | *  |
| 1263014         | 1264243         | yjcM |        | *      | *      | *      | *  |
| 1264528         | 1264848         | yjcN | *      | *      | *      | *      | *  |
| 1266085         | 1266588         | yjcP | *      | *      | *      | *      | *  |
| 1266600         | 1266884         | yjcQ | *      | *      |        | *      | *  |
| 1267746         | 1268063         | yjcS | *      | *      |        |        | *  |
| 1268300         | 1269055         | yjdA | *      | *      | *      | *      | *  |
| 1269204         | 1269551         | yjdB | *      | *      | *      | *      | *  |
| 1269943         | 1271889         | manR |        |        |        |        | *  |
| 1275281         | 1275763         | yjdF |        |        | *      | *      |    |
| 1275650         | 1276156         | yjdG |        |        |        | *      |    |
| 1276547         | 1276951         | yjdH |        |        | *      | *      |    |
| 1276997         | 1277476         | yjdI |        |        |        |        | *  |
| 1277876         | 1278364         | yjdJ | *      |        |        | *      | *  |
| 1278825         | 1279814         | ctaO |        |        |        |        | *  |
| 1279937         | 1280260         | cotT |        | *      |        | *      | *  |
| 1280439         | 1281842         | yjeA |        |        |        |        | *  |
| 1282041         | 1282514         | yjfA | *      |        |        |        |    |
| 1282480         | 1282647         | yjfB |        |        |        | *      |    |
| 1341852         | 1342430         | xkdU | *      |        |        |        |    |

| <i>Bacillus</i> | <i>subtilis</i> |        | Ref | Ref | Ref | Ref | TW |
|-----------------|-----------------|--------|-----|-----|-----|-----|----|
| begin           | end             | gene   | 16  | 12  | 14  | 51  |    |
| 1342701         | 1344764         | xkdV   |     |     | *   | *   |    |
| 1361640         | 1362602         | dppC   | *   |     |     |     |    |
| 1362607         | 1363614         | dppD   | *   |     |     |     |    |
| 1365607         | 1366311         | ykfA   | *   |     |     |     |    |
| 1366308         | 1367408         | ykfB   | *   |     |     |     |    |
| 1396719         | 1397051         | tnrA   |     | *   |     |     |    |
| 1397246         | 1397401         | ykzB   |     | *   |     |     |    |
| 1397489         | 1397671         | ykoL   |     | *   |     |     |    |
| 1397804         | 1398268         | ykoM   |     | *   |     |     |    |
| 1398283         | 1399404         | ykoN   |     | *   |     |     |    |
| 1413108         | 1413302         | sspD   |     |     |     | *   |    |
| 1429992         | 1430249         | spo0E  |     |     |     | *   |    |
| 1430335         | 1430766         | eag    |     |     |     | *   |    |
| 1441655         | 1442011         | ykvN   |     |     |     | *   | *  |
| 1442180         | 1442926         | ykvO   |     | *   |     | *   | *  |
| 1443407         | 1444606         | ykvP   |     | *   | *   | *   | *  |
| 1444946         | 1445644         | ykvQ   |     | *   |     | *   | *  |
| 1446559         | 1446849         | ykvR   |     | *   |     | *   | *  |
| 1447128         | 1447559         | ykvS   | *   | *   | *   |     | *  |
| 1447814         | 1448440         | ykvT   |     |     |     |     | *  |
| 1477376         | 1478140         | ykuF   |     | *   |     |     | *  |
| 1478441         | 1480723         | ykuG   |     | *   | *   | *   | *  |
| 1480853         | 1481401         | ykuH   |     | *   | *   | *   | *  |
| 1481554         | 1482777         | ykuI   |     | *   |     | *   | *  |
| 1483423         | 1483662         | ykuJ   |     | *   |     | *   | *  |
| 1483772         | 1484290         | ykuK   |     | *   |     | *   | *  |
| 1490246         | 1490491         | ykuS   |     |     |     | *   |    |
| 1511328         | 1511597         | ykoA   |     |     | *   |     |    |
| 1515646         | 1515780         | ykpC   |     |     |     | *   |    |
| 1524098         | 1524307         | ykzG   |     |     |     | *   |    |
| 1528752         | 1529729         | pdhB   |     |     |     |     | *  |
| 1529844         | 1531172         | pdhC   |     |     |     |     | *  |
| 1543221         | 1543490         | ylaB   |     |     | *   | *   |    |
| 1575206         | 1575385         | rpmF   |     |     | *   | *   |    |
| 1579425         | 1579856         | yllB   |     |     |     | *   |    |
| 1595331         | 1595696         | sbp    |     |     | *   | *   |    |
| 1608216         | 1608461         | ylmC   |     |     |     | *   |    |
| 1610722         | 1610994         | ylmG   |     |     | *   |     |    |
| 1611824         | 1612318         | divIVA |     |     |     | *   |    |
| 1654129         | 1654773         | yloS   |     |     | *   |     |    |
| 1670466         | 1670951         | ylqB   |     |     |     | *   |    |
| 1691529         | 1691849         | fliE   |     |     | *   | *   |    |
| 1694553         | 1695179         | fliH   |     |     |     | *   |    |
| 1696590         | 1697033         | fliJ   | *   |     |     |     |    |
| 1697045         | 1697686         | ylxF   | *   |     |     |     |    |
| 1699133         | 1699555         | ylxG   | *   |     |     |     |    |



| <i>Bacillus subtilis</i> |         |      | Ref | Ref | Ref | Ref | TW |
|--------------------------|---------|------|-----|-----|-----|-----|----|
| begin                    | end     | gene | 16  | 12  | 14  | 51  |    |
| 1699577                  | 1700371 | flgE | *   |     |     |     |    |
| 1700411                  | 1700626 | -    | *   |     |     |     |    |
| 1700623                  | 1701045 | fliL | *   |     |     | *   |    |
| 1703130                  | 1703492 | cheY |     |     |     | *   |    |
| 1704258                  | 1704923 | fliP |     |     | *   |     |    |
| 1738332                  | 1738601 | rpsO |     |     | *   |     |    |
| 1743216                  | 1743473 | ymxH |     |     |     | *   |    |
| 1755664                  | 1756248 | ymfE | *   |     | *   | *   |    |
| 1756523                  | 1756855 | ymfF | *   |     |     |     |    |
| 1782082                  | 1782759 | pksB |     |     | *   |     |    |
| 1864754                  | 1865125 | ymaG |     |     | *   |     |    |
| 1867339                  | 1867569 | ymzA |     |     |     | *   |    |
| 1877155                  | 1877562 | glnR |     |     |     | *   |    |
| 1879331                  | 1879621 | ynxB | *   | *   | *   | *   | *  |
| 1879821                  | 1880165 | ynzF |     | *   |     | *   | *  |
| 1880342                  | 1880593 | ynzG | *   | *   | *   | *   | *  |
| 1880913                  | 1881224 | ynaB | *   | *   |     | *   | *  |
| 1881294                  | 1882085 | ynaC | *   | *   | *   | *   | *  |
| 1882420                  | 1882932 | ynaD | *   | *   | *   | *   | *  |
| 1883492                  | 1884133 | ynaE | *   | *   | *   | *   | *  |
| 1884222                  | 1884575 | ynaF | *   | *   |     | *   | *  |
| 1884619                  | 1884894 | ynaG | *   | *   | *   | *   | *  |
| 1885497                  | 1885781 | ynaI | *   | *   |     | *   | *  |
| 1886606                  | 1887997 | ynaJ | *   | *   | *   | *   | *  |
| 1888028                  | 1889629 | xynB | *   | *   | *   | *   | *  |
| 1889766                  | 1890818 | xylR | *   | *   | *   | *   | *  |
| 1891162                  | 1892499 | xylA | *   |     |     | *   | *  |
| 1892650                  | 1894149 | xylB | *   |     |     |     | *  |
| 1894632                  | 1895267 | yncB | *   |     |     | *   |    |
| 1895632                  | 1896891 | yncC |     |     |     | *   |    |
| 1897149                  | 1898333 | yncD |     |     |     |     | *  |
| 1898843                  | 1899304 | yncE | *   |     | *   | *   | *  |
| 1899334                  | 1899768 | yncF | *   |     |     |     | *  |
| 1900372                  | 1900632 | ynzH | *   |     |     | *   | *  |
| 1901474                  | 1902313 | thyA | *   |     |     |     | *  |
| 1904250                  | 1904606 | cotC | *   |     | *   | *   | *  |
| 1904625                  | 1904813 | ynzA | *   |     |     |     | *  |
| 1905064                  | 1905462 | yndA | *   |     |     | *   | *  |
| 1910783                  | 1911589 | yndG |     |     | *   |     |    |
| 1911594                  | 1912211 | yndH | *   |     | *   |     |    |
| 1912208                  | 1913848 | yndJ |     |     | *   |     |    |
| 1913885                  | 1914250 | yndK | *   |     |     |     |    |
| 1914476                  | 1915234 | yndL | *   |     |     |     |    |
| 1915261                  | 1915800 | yndM | *   |     | *   | *   |    |
| 1915918                  | 1916352 | yndN | *   |     |     |     |    |
| 1917661                  | 1917978 | yneA | *   |     |     |     |    |

| <i>Bacillus</i> | <i>subtilis</i> | gene | Ref 16 | Ref 12 | Ref 14 | Ref 51 | TW |
|-----------------|-----------------|------|--------|--------|--------|--------|----|
| begin           | end             |      |        |        |        |        |    |
| 1922489         | 1923196         | ccdA |        | *      |        | *      | *  |
| 1923150         | 1922443         | ccdA |        |        |        | *      | *  |
| 1923239         | 1923601         | yneI |        |        |        | *      | *  |
| 1923680         | 1924171         | yneJ |        |        | *      | *      | *  |
| 1924202         | 1924630         | yneK |        |        |        | *      | *  |
| 1924864         | 1925256         | cotM |        |        |        | *      | *  |
| 1925383         | 1925529         | cotL |        | *      | *      |        |    |
| 1929656         | 1929907         | tlp  |        |        | *      |        |    |
| 1938134         | 1939531         | alsT |        |        |        | *      | *  |
| 1939834         | 1941333         | bglC |        |        |        | *      | *  |
| 1941401         | 1941664         | ynfE |        |        | *      |        |    |
| 1977000         | 1979000         | NF   |        |        |        |        | *  |
| 2001892         | 2002437         | yoeB | *      |        |        |        |    |
| 2017095         | 2017463         | rtp  |        |        |        | *      |    |
| 2026720         | 2027013         | yoaF |        |        |        | *      |    |
| 2027431         | 2027835         | yoaG | *      |        | *      | *      |    |
| 2028231         | 2028524         | yoaQ |        |        |        | *      |    |
| 2028684         | 2030288         | yoaH | *      |        |        |        | *  |
| 2031016         | 2032143         | yoaI | *      |        |        |        |    |
| 2033148         | 2033825         | yoaK | *      |        |        |        | *  |
| 2033998         | 2035035         | pelB | *      |        |        |        | *  |
| 2035292         | 2035975         | yoaM | *      |        |        |        | *  |
| 2038155         | 2038643         | yoaO | *      | *      |        | *      | *  |
| 2038863         | 2039618         | yoaP | *      | *      | *      |        | *  |
| 2039926         | 2040282         | yoaQ | *      | *      | *      | *      | *  |
| 2040830         | 2041081         | yoaF | *      | *      | *      | *      | *  |
| 2041182         | 2042093         | yoaR |        |        | *      |        | *  |
| 2042440         | 2042922         | yoaS | *      |        | *      | *      | *  |
| 2042932         | 2043186         | yoaG | *      |        |        |        | *  |
| 2043292         | 2044086         | yoaT | *      |        | *      |        |    |
| 2046234         | 2046665         | yoaW | *      | *      | *      | *      | *  |
| 2046929         | 2047561         | yoaZ | *      | *      |        | *      | *  |
| 2047787         | 2048707         | penP | *      | *      |        |        | *  |
| 2049204         | 2049566         | yobA | *      | *      | *      | *      | *  |
| 2049943         | 2050206         | yobB | *      | *      | *      | *      | *  |
| 2050539         | 2053139         | pps  |        |        |        | *      | *  |
| 2053853         | 2054494         | xynA | *      | *      | *      | *      | *  |
| 2055122         | 2055361         | -    | *      | *      |        |        | *  |
| 2055532         | 2055870         | yobD | *      | *      |        | *      | *  |
| 2055904         | 2056224         | yoaH | *      | *      | *      | *      | *  |
| 2056469         | 2056834         | yoaI | *      | *      |        | *      | *  |
| 2057056         | 2057715         | yobE | *      | *      | *      | *      | *  |
| 2057970         | 2058893         | yobF | *      | *      | *      | *      | *  |
| 2059492         | 2059947         | yoaJ | *      | *      |        | *      | *  |
| 2061405         | 2062520         | rapK | *      | *      | *      | *      | *  |
| 2062517         | 2062639         | phrK | *      | *      |        | *      | *  |

| <i>Bacillus</i> | <i>subtilis</i> | gene | Ref 16 | Ref 12 | Ref 14 | Ref 51 | TW |
|-----------------|-----------------|------|--------|--------|--------|--------|----|
| begin           | end             |      |        |        |        |        |    |
| 2062765         | 2063376         | yobH | *      | *      | *      | *      | *  |
| 2063455         | 2063802         | yozK | *      | *      |        | *      | *  |
| 2063795         | 2064088         | yozL | *      | *      | *      | *      | *  |
| 2064297         | 2064632         | yozM | *      | *      |        | *      | *  |
| 2064679         | 2068284         | yobI | *      | *      | *      | *      | *  |
| 2069499         | 2070341         | yobJ | *      | *      | *      | *      | *  |
| 2070541         | 2070999         | yobK | *      | *      |        | *      | *  |
| 2071009         | 2072811         | yobL | *      | *      |        | *      | *  |
| 2072913         | 2073401         | yobM | *      | *      |        | *      | *  |
| 2073694         | 2075034         | yobN | *      |        |        | *      | *  |
| 2075461         | 2077881         | yobO | *      |        |        | *      | *  |
| 2083469         | 2084014         | yobW |        |        | *      |        |    |
| 2098702         | 2099046         | yozO | *      |        |        |        |    |
| 2096338         | 2096967         | yocK |        |        |        |        | *  |
| 2096904         | 2097236         | yocL |        |        |        |        | *  |
| 2097528         | 2098004         | yocM |        |        |        |        | *  |
| 2098071         | 2098334         | yozN |        |        |        |        | *  |
| 2098339         | 2098572         | yocN |        |        |        |        | *  |
| 2117767         | 2118372         | yojJ |        |        | *      |        |    |
| 2120842         | 2121270         | yojG |        |        |        | *      |    |
| 2125748         | 2126137         | yodA |        |        |        | *      |    |
| 2147919         | 2148320         | cgeA | *      |        |        | *      |    |
| 2151329         | 2151505         | yotN | *      | *      | *      | *      | *  |
| 2151508         | 2152095         | yotM | *      | *      | *      |        | *  |
| 2152170         | 2152412         | yotL | *      | *      | *      | *      | *  |
| 2152414         | 2152599         | yotK | *      | *      | *      |        | *  |
| 2152683         | 2152895         | yotJ | *      | *      | *      | *      | *  |
| 2152961         | 2153323         | yotI | *      | *      | *      | *      | *  |
| 2153320         | 2153493         | yotH | *      | *      |        | *      | *  |
| 2153509         | 2153826         | yotG | *      | *      |        | *      | *  |
| 2153839         | 2153916         | yotF | *      | *      |        | *      | *  |
| 2153948         | 2154094         | yotE | *      | *      | *      | *      | *  |
| 2154130         | 2154261         | yotD | *      | *      | *      | *      | *  |
| 2154301         | 2154492         | yotC | *      | *      | *      | *      | *  |
| 2154536         | 2155363         | yotB | *      | *      |        | *      | *  |
| 2155437         | 2155655         | sspC |        |        |        | *      | *  |
| 2155891         | 2155956         | yosZ | *      | *      |        |        | *  |
| 2156000         | 2156353         | yosX | *      | *      |        | *      | *  |
| 2156584         | 2156925         | yosW | *      | *      | *      | *      | *  |
| 2157072         | 2157362         | yosV | *      | *      | *      | *      | *  |
| 2157682         | 2157927         | yosU | *      | *      | *      | *      | *  |
| 2157967         | 2158416         | yosT | *      | *      | *      | *      | *  |
| 2158511         | 2158939         | yosS | *      | *      |        |        | *  |
| 2158940         | 2159182         | yosR |        |        |        | *      | *  |
| 2159808         | 2160329         | yosQ | *      | *      | *      | *      | *  |
| 2160434         | 2161021         | yosP | *      | *      |        |        | *  |

| <i>Bacillus</i> | <i>subtilis</i> | gene | Ref 16 | Ref 12 | Ref 14 | Ref 51 | TW |
|-----------------|-----------------|------|--------|--------|--------|--------|----|
| begin           | end             |      |        |        |        |        |    |
| 2161351         | 2163711         | yosO | *      | *      |        |        | *  |
| 2164135         | 2164857         | yosN | *      | *      | *      | *      | *  |
| 2164820         | 2165209         | yosM | *      | *      | *      | *      | *  |
| 2165215         | 2165568         | yosL | *      | *      |        | *      | *  |
| 2165656         | 2165856         | yosK | *      | *      | *      | *      | *  |
| 2166071         | 2166205         | yosI |        | *      |        | *      | *  |
| 2166237         | 2166707         | yosH |        | *      |        | *      | *  |
| 2166813         | 2167175         | yosG | *      | *      |        | *      | *  |
| 2167218         | 2167343         | yosF | *      | *      |        | *      | *  |
| 2167357         | 2167704         | yosE | *      | *      |        | *      | *  |
| 2167719         | 2168114         | yosD | *      | *      | *      | *      | *  |
| 2168153         | 2168695         | yosC | *      | *      |        | *      | *  |
| 2168740         | 2168919         | yosB | *      | *      | *      | *      | *  |
| 2169273         | 2169485         | yorZ | *      | *      | *      | *      | *  |
| 2169552         | 2169734         | yorY | *      | *      | *      | *      | *  |
| 2169747         | 2169974         | yorX | *      | *      |        | *      | *  |
| 2170014         | 2170379         | yorW | *      | *      | *      | *      | *  |
| 2170382         | 2170600         | yorV | *      | *      |        | *      | *  |
| 2170644         | 2171975         | mtbP | *      | *      | *      | *      | *  |
| 2172024         | 2172143         | yorT | *      | *      |        | *      | *  |
| 2172175         | 2172693         | yorS | *      | *      | *      | *      | *  |
| 2172702         | 2173199         | yorR | *      | *      |        | *      | *  |
| 2173154         | 2173309         | yorQ |        | *      |        | *      | *  |
| 2173347         | 2173562         | yorP | *      | *      | *      | *      | *  |
| 2173595         | 2173792         | yorO | *      | *      | *      |        | *  |
| 2173783         | 2173932         | yorN |        | *      |        | *      | *  |
| 2174093         | 2174809         | yorM | *      | *      | *      | *      | *  |
| 2174837         | 2178754         | yorL | *      | *      | *      | *      | *  |
| 2178767         | 2180497         | yorK | *      | *      | *      | *      | *  |
| 2180497         | 2181633         | yorJ | *      | *      | *      | *      | *  |
| 2181649         | 2183163         | yorI | *      | *      | *      | *      | *  |
| 2183178         | 2183648         | yorH | *      | *      | *      | *      | *  |
| 2183646         | 2184617         | yorG |        | *      |        | *      | *  |
| 2184745         | 2185659         | yorF | *      | *      |        | *      | *  |
| 2185681         | 2186052         | yorE | *      | *      | *      | *      | *  |
| 2186226         | 2186540         | yorD | *      | *      |        | *      | *  |
| 2186617         | 2186997         | yorC | *      | *      |        | *      | *  |
| 2187060         | 2187356         | yorB | *      | *      |        | *      | *  |
| 2187445         | 2189205         | yorA | *      | *      | *      | *      | *  |
| 2189202         | 2190026         | yoqZ | *      | *      | *      | *      | *  |
| 2190125         | 2190520         | yoqY | *      | *      |        | *      | *  |
| 2190575         | 2190796         | yoqX | *      | *      |        |        | *  |
| 2190867         | 2191541         | yoqW | *      | *      |        |        | *  |
| 2191611         | 2192423         | yoqV | *      | *      |        | *      | *  |
| 2192489         | 2192902         | yoqU | *      | *      |        |        | *  |
| 2193068         | 2193217         | yoqT | *      | *      | *      |        | *  |

| <i>Bacillus</i> | <i>subtilis</i> | gene | Ref 16 | Ref 12 | Ref 14 | Ref 51 | TW |
|-----------------|-----------------|------|--------|--------|--------|--------|----|
| begin           | end             |      |        |        |        |        |    |
| 2193294         | 2193641         | yoqS | *      | *      | *      | *      | *  |
| 2193643         | 2193999         | yoqR | *      | *      | *      | *      | *  |
| 2193959         | 2194300         | yoqP | *      | *      |        | *      | *  |
| 2194414         | 2194788         | yoqO | *      | *      | *      | *      | *  |
| 2194760         | 2194978         | yoqN |        | *      |        | *      | *  |
| 2195227         | 2195505         | yoqM | *      | *      | *      | *      | *  |
| 2195630         | 2196322         | yoqL | *      | *      | *      | *      | *  |
| 2196362         | 2196565         | yoqK | *      | *      | *      | *      | *  |
| 2196585         | 2197100         | yoqJ | *      | *      | *      | *      | *  |
| 2197311         | 2197505         | yoqI | *      | *      |        | *      | *  |
| 2197554         | 2198006         | yoqH | *      | *      | *      | *      | *  |
| 2198089         | 2198346         | yoqG | *      | *      |        | *      | *  |
| 2198391         | 2198594         | yoqF | *      | *      |        | *      | *  |
| 2198603         | 2198767         | yoqE | *      | *      | *      | *      | *  |
| 2198821         | 2199576         | yoqD | *      | *      |        | *      | *  |
| 2199617         | 2200024         | yoqC | *      | *      | *      | *      | *  |
| 2200031         | 2200369         | yoqB | *      | *      | *      |        | *  |
| 2200729         | 2200932         | yopZ |        | *      | *      |        | *  |
| 2200946         | 2201224         | yopY | *      | *      | *      |        | *  |
| 2201221         | 2201625         | yopX | *      | *      |        |        | *  |
| 2201622         | 2201957         | yopW | *      | *      | *      | *      | *  |
| 2202046         | 2202240         | yopV | *      | *      |        | *      | *  |
| 2202352         | 2202549         | yopU | *      | *      | *      | *      | *  |
| 2202619         | 2202837         | yopT | *      | *      | *      | *      | *  |
| 2203020         | 2203244         | yopS | *      | *      |        | *      | *  |
| 2203433         | 2204410         | yopR | *      | *      | *      | *      | *  |
| 2204434         | 2205816         | yopQ | *      | *      | *      | *      | *  |
| 2205923         | 2206999         | yopP | *      | *      | *      | *      | *  |
| 2206989         | 2207201         | yopO | *      | *      |        | *      | *  |
| 2207249         | 2207566         | yopN | *      | *      | *      | *      | *  |
| 2207569         | 2207769         | yopM | *      | *      | *      | *      | *  |
| 2208235         | 2209395         | yopK | *      | *      | *      | *      | *  |
| 2209572         | 2209988         | yopJ | *      | *      | *      | *      | *  |
| 2209990         | 2210523         | yopI | *      | *      | *      | *      | *  |
| 2210550         | 2211086         | yopH | *      | *      | *      | *      | *  |
| 2211267         | 2211482         | yopF | *      | *      |        | *      | *  |
| 2211486         | 2211737         | yopE | *      | *      |        | *      | *  |
| 2212089         | 2212319         | -    | *      | *      |        |        | *  |
| 2212324         | 2212719         | yopD | *      | *      | *      | *      | *  |
| 2212777         | 2214105         | yopC | *      | *      | *      | *      | *  |
| 2214213         | 2214440         | yopB | *      | *      |        |        | *  |
| 2214701         | 2216017         | yopA | *      | *      | *      | *      | *  |
| 2216374         | 2216880         | yonX | *      | *      |        | *      | *  |
| 2217208         | 2218440         | yonV | *      | *      | *      | *      | *  |
| 2218522         | 2218710         | yonU | *      | *      |        | *      | *  |
| 2219025         | 2219201         | yonT | *      | *      | *      | *      | *  |

| <i>Bacillus</i> | <i>subtilis</i> | gene | Ref 16 | Ref 12 | Ref 14 | Ref 51 | TW |
|-----------------|-----------------|------|--------|--------|--------|--------|----|
| begin           | end             |      |        |        |        |        |    |
| 2219576         | 2220187         | yonS | *      | *      |        | *      | *  |
| 2220302         | 2220628         | yonR | *      | *      |        | *      | *  |
| 2221581         | 2221775         | yonP | *      | *      |        | *      | *  |
| 2221815         | 2224334         | yonO | *      | *      | *      | *      | *  |
| 2224533         | 2224811         | yonN |        | *      |        | *      | *  |
| 2226538         | 2226729         | yonK | *      | *      |        | *      | *  |
| 2226746         | 2227963         | yonJ | *      | *      |        | *      | *  |
| 2227997         | 2228407         | yonI | *      | *      | *      | *      | *  |
| 2228626         | 2229126         | yonH | *      | *      | *      | *      | *  |
| 2229229         | 2230149         | yonG | *      | *      |        | *      | *  |
| 2230136         | 2231905         | yonF | *      | *      | *      | *      | *  |
| 2231923         | 2233443         | yonE | *      | *      | *      | *      | *  |
| 2233474         | 2234910         | yonD | *      | *      |        | *      | *  |
| 2234890         | 2235426         | yonC |        | *      |        | *      | *  |
| 2235465         | 2236481         | yonB |        | *      |        |        | *  |
| 2236562         | 2237032         | yonA | *      | *      |        | *      | *  |
| 2237047         | 2237442         | yomZ | *      | *      | *      | *      | *  |
| 2237439         | 2237693         | yomY | *      | *      | *      | *      | *  |
| 2237677         | 2238327         | yomX | *      | *      | *      | *      | *  |
| 2238324         | 2238830         | yomW | *      | *      | *      | *      | *  |
| 2238827         | 2239537         | yomV | *      | *      | *      | *      | *  |
| 2239580         | 2240377         | yomU |        | *      |        | *      | *  |
| 2241006         | 2241233         | yomT | *      | *      | *      | *      | *  |
| 2241297         | 2241653         | yomS | *      | *      | *      | *      | *  |
| 2241655         | 2242872         | yomR | *      | *      | *      | *      | *  |
| 2242883         | 2243233         | yomQ | *      | *      | *      | *      | *  |
| 2243230         | 2243421         | yomP | *      | *      |        | *      | *  |
| 2243471         | 2243971         | yomO | *      | *      |        | *      | *  |
| 2243955         | 2244374         | yomN | *      | *      |        | *      | *  |
| 2244388         | 2245389         | yomM | *      | *      | *      | *      | *  |
| 2245392         | 2245721         | yoZP | *      | *      | *      | *      | *  |
| 2245897         | 2246583         | yomL | *      | *      |        | *      | *  |
| 2247130         | 2247576         | yomK | *      | *      | *      | *      | *  |
| 2247658         | 2248341         | yomJ | *      | *      |        | *      | *  |
| 2248395         | 2255252         | yomI | *      | *      |        | *      | *  |
| 2255303         | 2256061         | yomH | *      | *      | *      | *      | *  |
| 2256073         | 2258700         | yomG | *      | *      | *      | *      | *  |
| 2258716         | 2259537         | yomF | *      | *      | *      | *      | *  |
| 2259574         | 2261508         | yomE | *      | *      | *      | *      | *  |
| 2261678         | 2262502         | yomD | *      | *      | *      | *      | *  |
| 2262730         | 2263833         | yomC | *      | *      | *      | *      | *  |
| 2263921         | 2264133         | yomB | *      | *      | *      | *      | *  |
| 2264144         | 2264410         | yomA | *      | *      | *      | *      | *  |
| 2264466         | 2264912         | yolK | *      | *      | *      | *      | *  |
| 2264909         | 2266177         | yolJ | *      | *      | *      | *      | *  |
| 2266177         | 2266590         | yolI | *      | *      | *      | *      | *  |

| <i>Bacillus subtilis</i> |         |       | Ref | Ref | Ref | Ref | TW |
|--------------------------|---------|-------|-----|-----|-----|-----|----|
| begin                    | end     | gene  | 16  | 12  | 14  | 51  |    |
| 2266587                  | 2268704 | sunT  | *   | *   | *   | *   | *  |
| 2268762                  | 2268932 | sunA  |     | *   | *   | *   | *  |
| 2269229                  | 2269546 | yolF  | *   | *   | *   | *   | *  |
| 2269648                  | 2270898 | uvrX  | *   | *   | *   | *   | *  |
| 2270891                  | 2271223 | yolD  | *   | *   |     | *   | *  |
| 2271397                  | 2271732 | yolC  | *   | *   |     | *   | *  |
| 2271775                  | 2272131 | yolB  | *   | *   |     | *   | *  |
| 2272137                  | 2272604 | yolA  | *   | *   | *   | *   | *  |
| 2273230                  | 2273763 | yokL  | *   | *   | *   | *   | *  |
| 2273799                  | 2274377 | yokK  | *   | *   |     | *   | *  |
| 2274441                  | 2274938 | yokJ  |     | *   | *   | *   | *  |
| 2274947                  | 2276662 | yokI  | *   | *   |     | *   | *  |
| 2276762                  | 2277319 | yokH  | *   | *   |     | *   | *  |
| 2277843                  | 2278916 | yokG  | *   | *   | *   | *   | *  |
| 2279218                  | 2280108 | yokF  | *   | *   |     | *   | *  |
| 2280122                  | 2280604 | yokE  | *   | *   | *   | *   | *  |
| 2280908                  | 2281726 | yokD  | *   | *   | *   | *   | *  |
| 2282377                  | 2282892 | yokC  | *   | *   | *   | *   | *  |
| 2283099                  | 2283809 | yokB  | *   | *   | *   | *   | *  |
| 2284012                  | 2285649 | yokA  | *   | *   | *   | *   | *  |
| 2286338                  | 2286769 | yppQ  | *   |     |     |     | *  |
| 2291673                  | 2291924 | ypmP  |     |     | *   |     |    |
| 2307354                  | 2307536 | degR  |     |     |     | *   |    |
| 2308034                  | 2308216 | ypeQ  |     |     | *   |     |    |
| 2332026                  | 2332253 | cotD  |     |     | *   |     |    |
| 2338006                  | 2338377 | yppE  |     |     |     | *   |    |
| 2339041                  | 2340003 | yppC  |     |     | *   |     |    |
| 2348061                  | 2348546 | ypmB  |     |     |     | *   |    |
| 2387847                  | 2388050 | yphE  |     |     | *   |     |    |
| 2391988                  | 2392587 | yphA  |     |     | *   |     |    |
| 2396035                  | 2396211 | ypfB  |     |     | *   |     |    |
| 2404348                  | 2404791 | ypbF  |     |     | *   |     |    |
| 2430559                  | 2430711 | ypuE  |     |     | *   | *   |    |
| 2430970                  | 2431314 | ypuD  | *   |     |     | *   |    |
| 2432370                  | 2432606 | ypzC  |     |     | *   |     |    |
| 2433009                  | 2433398 | ypuC  |     |     | *   | *   |    |
| 2434245                  | 2434457 | ypzD  |     |     | *   |     |    |
| 2551678                  | 2551851 | sinI  |     |     |     | *   |    |
| 2551885                  | 2552220 | sinR  |     |     |     |     | *  |
| 2552313                  | 2553098 | tasA  |     |     | *   | *   |    |
| 2553162                  | 2553734 | sipW  |     |     |     | *   |    |
| 2553718                  | 2554479 | yqxM  |     |     |     | *   |    |
| 2555370                  | 2555744 | comGG |     |     |     | *   |    |
| 2558284                  | 2559354 | comGA |     |     | *   |     |    |
| 2563303                  | 2563683 | yqgZ  | *   |     |     |     |    |
| 2563915                  | 2564160 | yqgY  |     |     | *   |     |    |

| <i>Bacillus subtilis</i> |         |         | Ref | Ref | Ref | Ref | TW |
|--------------------------|---------|---------|-----|-----|-----|-----|----|
| begin                    | end     | gene    | 16  | 12  | 14  | 51  |    |
| 2564993                  | 2565166 | yqgW    |     |     | *   | *   |    |
| 2572796                  | 2572969 | yqgO    |     |     | *   | *   |    |
| 2583267                  | 2584559 | yqgE    |     |     |     |     | *  |
| 2584666                  | 2585274 | sodA    |     |     |     |     | *  |
| 2585453                  | 2585935 | yqgC    |     |     |     |     | *  |
| 2586045                  | 2586803 | yqgB    |     |     |     |     | *  |
| 2587272                  | 2587700 | yqgA    | *   |     | *   | *   |    |
| 2610160                  | 2610570 | cdd     |     |     |     | *   |    |
| 2610732                  | 2611076 | dgkA    |     |     | *   |     |    |
| 2636809                  | 2639139 | comEC   |     |     | *   |     |    |
| 2646679                  | 2646837 | sda     |     |     |     | *   |    |
| 2649108                  | 2649734 | yqeD    |     |     | *   |     |    |
| 2651656                  | 2652066 | nucB    | *   |     |     |     |    |
| 2652262                  | 2652732 | spoIVCB | *   | *   |     |     |    |
| 2652640                  | 2654142 | spoIVCA | *   | *   | *   | *   | *  |
| 2654591                  | 2655010 | yqcM    | *   | *   |     | *   | *  |
| 2655022                  | 2656062 | yqcL    | *   | *   |     | *   | *  |
| 2656085                  | 2656525 | yqcK    | *   | *   | *   | *   | *  |
| 2656586                  | 2656903 | yqcJ    | *   | *   | *   | *   | *  |
| 2657275                  | 2658039 | yqcI    | *   | *   | *   | *   | *  |
| 2658483                  | 2659610 | rapE    | *   | *   |     | *   | *  |
| 2659600                  | 2659734 | phrE    | *   | *   |     | *   | *  |
| 2659844                  | 2660002 | yqzI    | *   | *   |     | *   | *  |
| 2660372                  | 2661967 | yqcG    | *   | *   |     | *   | *  |
| 2661982                  | 2662560 | yqcF    | *   | *   | *   | *   | *  |
| 2662821                  | 2663183 | yqxJ    | *   | *   |     | *   | *  |
| 2663156                  | 2663635 | yqxI    |     | *   |     | *   | *  |
| 2663843                  | 2664661 | cwlA    | *   | *   | *   |     | *  |
| 2664706                  | 2665128 | yqxH    | *   | *   | *   | *   | *  |
| 2665173                  | 2666066 | yqxG    | *   | *   |     | *   | *  |
| 2666154                  | 2666318 | yqcE    | *   | *   |     | *   | *  |
| 2666272                  | 2666607 | yqcD    |     | *   | *   | *   | *  |
| 2666617                  | 2667717 | yqcC    |     | *   |     | *   | *  |
| 2667720                  | 2667992 | yqcB    |     | *   |     | *   | *  |
| 2667989                  | 2668567 | yqcA    |     | *   |     | *   | *  |
| 2668551                  | 2669597 | yqbT    |     | *   |     |     |    |
| 2669590                  | 2670015 | yqbS    |     | *   |     |     |    |
| 2670028                  | 2670291 | yqbR    |     | *   |     | *   |    |
| 2670288                  | 2671268 | yqbQ    |     | *   |     |     |    |
| 2671281                  | 2671940 | yqbP    |     | *   |     |     |    |
| 2671933                  | 2676690 | yqbO    |     | *   |     | *   | *  |
| 2676872                  | 2677321 | yqbN    |     | *   |     |     | *  |
| 2681755                  | 2682150 | yqbG    | *   | *   |     |     |    |
| 2676872                  | 2677321 | yqbN    |     | *   |     |     |    |
| 2677467                  | 2677646 | yqdB    |     | *   | *   |     |    |
| 2678369                  | 2678812 | yqbM    |     | *   |     |     |    |



| <i>Bacillus</i> | <i>subtilis</i> | gene | Ref 16 | Ref 12 | Ref 14 | Ref 51 | TW |
|-----------------|-----------------|------|--------|--------|--------|--------|----|
| begin           | end             |      |        |        |        |        |    |
| 2678815         | 2679219         | yqbL | *      |        |        |        |    |
| 2679297         | 2680214         | yqbK | *      |        |        |        |    |
| 2680403         | 2680840         | yqbJ | *      |        |        |        |    |
| 2680853         | 2681356         | yqbI | *      |        |        |        |    |
| 2681353         | 2681715         | yqbH | *      | *      | *      |        |    |
| 2681712         | 2682107         | yqbG | *      |        | *      |        |    |
| 2682111         | 2682422         | yqbF | *      | *      | *      |        |    |
| 2682433         | 2683368         | yqbE | *      |        | *      | *      |    |
| 2683387         | 2684355         | yqbD | *      |        |        | *      |    |
| 2684388         | 2685041         | yqbC | *      | *      | *      | *      |    |
| 2685082         | 2685999         | yqbB | *      |        |        | *      |    |
| 2685996         | 2687528         | yqbA | *      |        | *      | *      |    |
| 2687532         | 2688827         | yqaT | *      | *      |        | *      |    |
| 2688820         | 2689539         | yqaS | *      |        |        | *      |    |
| 2689607         | 2690071         | yqaR | *      | *      | *      | *      |    |
| 2690215         | 2690670         | yqaQ | *      |        | *      | *      |    |
| 2690868         | 2691797         | yqaP | *      | *      | *      | *      |    |
| 2691871         | 2692077         | yqaO | *      |        | *      | *      |    |
| 2692159         | 2692587         | yqaN | *      | *      | *      | *      |    |
| 2692823         | 2693764         | yqaM | *      |        | *      | *      |    |
| 2693646         | 2694347         | yqaL | *      | *      |        | *      |    |
| 2694399         | 2695253         | yqaK | *      |        | *      | *      |    |
| 2695256         | 2696215         | yqaJ | *      |        |        | *      |    |
| 2696321         | 2696515         | yqaI | *      |        | *      | *      |    |
| 2696645         | 2696902         | yqaH | *      |        | *      | *      |    |
| 2696899         | 2697468         | yqaG | *      |        | *      | *      |    |
| 2697542         | 2697682         | yqaA | *      | *      |        | *      |    |
| 2697755         | 2697985         | yqaF | *      | *      | *      | *      | *  |
| 2698162         | 2698512         | yqaE | *      | *      | *      | *      | *  |
| 2698779         | 2698946         | yqaD | *      | *      | *      | *      | *  |
| 2699302         | 2699838         | yqaC | *      | *      | *      | *      | *  |
| 2700107         | 2700625         | yqaB | *      | *      | *      | *      | *  |
| 2701205         | 2701369         | yrkS |        |        | *      | *      | *  |
| 2704624         | 2705841         | yrkO |        |        | *      |        | *  |
| 2706353         | 2706910         | yrkN |        |        |        |        | *  |
| 2706989         | 2707096         | yrkM |        | *      | *      | *      | *  |
| 2707401         | 2707925         | yrkL |        | *      |        |        | *  |
| 2708212         | 2708688         | yrkK | *      | *      | *      | *      | *  |
| 2709271         | 2710056         | yrkJ | *      | *      | *      | *      | *  |
| 2710117         | 2710344         | yrkI | *      | *      |        | *      | *  |
| 2710378         | 2711265         | yrkH | *      | *      |        |        | *  |
| 2711394         | 2711504         | yrkG | *      | *      | *      | *      | *  |
| 2711803         | 2712360         | yrkF |        | *      |        | *      | *  |
| 2712589         | 2713071         | yrkE | *      | *      |        | *      | *  |
| 2714202         | 2714762         | yrkC | *      | *      |        | *      | *  |
| 2714988         | 2715134         | yrkB |        | *      | *      | *      | *  |

| <i>Bacillus subtilis</i> | begin   | end  | gene | Ref 16 | Ref 12 | Ref 14 | Ref 51 | TW |
|--------------------------|---------|------|------|--------|--------|--------|--------|----|
| 2715304                  | 2716125 | bltR | *    | *      |        | *      | *      |    |
| 2716242                  | 2717444 | blt  | *    | *      | *      | *      | *      |    |
| 2717613                  | 2718071 | bltD | *    | *      |        | *      | *      |    |
| 2718228                  | 2719532 | yrkA | *    | *      |        | *      | *      |    |
| 2719956                  | 2720921 | yrdR | *    | *      | *      | *      | *      |    |
| 2721047                  | 2721913 | yrdQ | *    | *      | *      | *      | *      |    |
| 2722036                  | 2723073 | trkA | *    | *      | *      | *      | *      |    |
| 2723161                  | 2724096 | czcD | *    | *      |        | *      | *      |    |
| 2724340                  | 2724729 | yrdN |      | *      |        | *      | *      |    |
| 2725106                  | 2725996 | gltR | *    | *      | *      | *      | *      |    |
| 2726154                  | 2726471 | yrdK |      | *      | *      | *      | *      |    |
| 2726429                  | 2727751 | brnQ | *    | *      |        |        | *      |    |
| 2728245                  | 2729009 | azlC | *    | *      | *      | *      | *      |    |
| 2729022                  | 2729495 | azlB | *    | *      | *      | *      | *      |    |
| 2729829                  | 2730104 | yrdF | *    | *      |        | *      | *      |    |
| 2730376                  | 2731608 | cypA | *    | *      |        |        | *      |    |
| 2732001                  | 2732150 | yrdD | *    | *      | *      | *      | *      |    |
| 2732249                  | 2732812 | yrdC | *    | *      | *      | *      | *      |    |
| 2733041                  | 2733412 | yrdB | *    | *      | *      | *      | *      |    |
| 2734222                  | 2734725 | yrdA |      | *      |        | *      | *      |    |
| 2734951                  | 2735805 | aadK | *    | *      | *      | *      | *      |    |
| 2736141                  | 2737184 | yrpB |      | *      |        | *      | *      |    |
| 2737577                  | 2738374 | yrpC | *    | *      |        | *      | *      |    |
| 2738755                  | 2739462 | yrpD | *    | *      |        |        | *      |    |
| 2740626                  | 2741381 | yrpE | *    | *      |        | *      | *      |    |
| 2741513                  | 2742043 | sigZ | *    | *      |        | *      | *      |    |
| 2743432                  | 2744748 | yraO | *    | *      | *      | *      | *      |    |
| 2744863                  | 2745732 | yraN | *    | *      | *      | *      | *      |    |
| 2745877                  | 2746980 | yraM | *    | *      | *      | *      | *      |    |
| 2747210                  | 2748043 | csn  |      | *      |        |        |        |    |
| 2748486                  | 2748749 | yraL |      | *      |        | *      |        |    |
| 2748886                  | 2749575 | yraK |      | *      |        |        |        |    |
| 2750108                  | 2750470 | yraJ |      | *      |        |        |        |    |
| 2750517                  | 2750951 | yraI |      | *      |        |        |        |    |
| 2751392                  | 2751778 | yraH |      | *      | *      | *      |        |    |
| 2752027                  | 2752272 | yraG |      | *      |        |        |        |    |
| 2752290                  | 2752658 | yraF |      | *      |        |        |        |    |
| 2752677                  | 2753813 | adhB |      | *      |        |        |        |    |
| 2753832                  | 2754029 | yraE |      | *      |        |        |        |    |
| 2754045                  | 2754344 | yraD |      | *      |        |        |        |    |
| 2754394                  | 2754669 | yraC |      | *      | *      |        |        |    |
| 2754607                  | 2755029 | yraB |      | *      |        |        |        |    |
| 2755537                  | 2756586 | adhA |      | *      |        |        |        |    |
| 2765783                  | 2767162 | aapA |      |        |        |        | *      |    |
| 2767269                  | 2767901 | yrhP |      |        | *      |        | *      |    |
| 2768054                  | 2768881 | yrhO |      |        |        |        | *      |    |

| <i>Bacillus</i> | <i>subtilis</i> | gene | Ref 16 | Ref 12 | Ref 14 | Ref 51 | TW |
|-----------------|-----------------|------|--------|--------|--------|--------|----|
| begin           | end             |      |        |        |        |        |    |
| 2769120         | 2769620         | sigV | *      |        |        |        |    |
| 2770588         | 2772492         | yrhL |        |        | *      |        |    |
| 2777147         | 2777689         | yrhH | *      |        | *      | *      |    |
| 2804974         | 2805498         | yrrD |        |        | *      |        |    |
| 2809738         | 2809953         | yrvP |        |        | *      |        |    |
| 2839796         | 2840017         | yrzG |        |        | *      |        |    |
| 2851383         | 2851826         | pheB |        |        |        | *      |    |
| 2863687         | 2864433         | comC |        |        | *      |        |    |
| 2896852         | 2897187         | ysnD |        |        |        | *      |    |
| 2951723         | 2951923         | rpmI |        |        | *      |        |    |
| 2952629         | 2952853         | yscA |        |        | *      |        |    |
| 2952903         | 2953535         | yscB |        |        | *      | *      |    |
| 2965453         | 2965839         | speD |        |        |        | *      |    |
| 3010627         | 3010863         | ytzD |        |        | *      |        |    |
| 3069327         | 3070484         | ythQ |        |        | *      |        |    |
| 3071449         | 3071670         | ytzE |        |        |        | *      |    |
| 3071824         | 3072297         | ytzF | *      |        |        |        |    |
| 3081340         | 3081831         | yteQ | *      |        |        |        |    |
| 3116077         | 3117063         | ytrC |        |        | *      |        |    |
| 3135986         | 3136423         | ytkA |        |        |        | *      |    |
| 3140975         | 3141142         | ythC |        |        | *      |        |    |
| 3189501         | 3189764         | yubF |        |        |        | *      |    |
| 3198272         | 3198586         | yulD |        |        |        | *      |    |
| 3218905         | 3219309         | yugN | *      |        |        |        |    |
| 3219369         | 3219740         | yugM |        |        | *      |        |    |
| 3251848         | 3252492         | comA |        |        |        |        | *  |
| 3252573         | 3254882         | comP | *      | *      | *      | *      |    |
| 3254897         | 3255064         | comX | *      | *      | *      | *      |    |
| 3255052         | 3255951         | comQ | *      | *      | *      | *      |    |
| 3256136         | 3256276         | degQ | *      |        | *      | *      |    |
| 3256737         | 3257105         | yuzC | *      |        |        | *      |    |
| 3257081         | 3258310         | yuxH |        |        |        | *      |    |
| 3262911         | 3263300         | yuzE |        |        | *      |        |    |
| 3279351         | 3279521         | -    | *      |        |        |        |    |
| 3279576         | 3282215         | yukL | *      |        |        | *      |    |
| 3282303         | 3282518         | yukM | *      |        |        | *      |    |
| 3282876         | 3286712         | dhbF | *      |        |        | *      |    |
| 3287698         | 3289317         | dhbE | *      |        |        |        |    |
| 3289346         | 3290542         | dhbC | *      |        |        |        |    |
| 3290568         | 3291353         | dhbA | *      |        |        |        |    |
| 3298775         | 3298918         | yuiA |        |        | *      |        |    |
| 3326305         | 3327645         | yunH | *      |        |        |        |    |
| 3327820         | 3329415         | yunI | *      |        |        |        |    |
| 3329560         | 3330909         | yunJ | *      |        |        |        |    |
| 3330915         | 3332207         | yunK | *      |        |        |        |    |
| 3332220         | 3333704         | yunL | *      |        |        |        |    |

| <i>Bacillus</i> | <i>subtilis</i> | gene  | Ref 16 | Ref 12 | Ref 14 | Ref 51 | TW |
|-----------------|-----------------|-------|--------|--------|--------|--------|----|
| begin           | end             |       |        |        |        |        |    |
| 3333683         | 3334048         | yunM  | *      |        |        |        |    |
| 3334809         | 3335330         | yurB  | *      |        |        |        |    |
| 3335321         | 3337558         | yurC  | *      |        |        |        | *  |
| 3337559         | 3338392         | yurD  | *      |        |        |        | *  |
| 3338414         | 3339007         | yurE  | *      |        |        |        | *  |
| 3339004         | 3339996         | yurF  | *      |        |        |        |    |
| 3340225         | 3341475         | yurG  | *      |        |        |        |    |
| 3341492         | 3342730         | yurH  | *      |        |        |        |    |
| 3343172         | 3344038         | yurI  | *      |        |        |        |    |
| 3344072         | 3345175         | yurJ  | *      |        |        |        |    |
| 3353239         | 3353514         | yurS  |        |        |        | *      |    |
| 3456428         | 3457138         | yvaP  |        |        | *      |        |    |
| 3461136         | 3462281         | opuBA |        |        |        |        | *  |
| 3462556         | 3463098         | yvaV  |        |        |        |        | *  |
| 3463352         | 3463828         | yvaW  | *      | *      | *      | *      | *  |
| 3463825         | 3464796         | yvaX  | *      | *      | *      | *      | *  |
| 3464839         | 3465450         | yvaY  | *      | *      | *      | *      | *  |
| 3465497         | 3466120         | yvaZ  | *      | *      | *      | *      | *  |
| 3466117         | 3466389         | yvbA  | *      | *      | *      | *      | *  |
| 3466577         | 3467266         | opuCD |        | *      |        |        | *  |
| 3467284         | 3468195         | opuCC |        |        |        |        | *  |
| 3542003         | 3543346         | yvdP  |        |        | *      | *      |    |
| 3543702         | 3544664         | yvdO  |        |        | *      |        |    |
| 3550539         | 3551423         | yvdJ  |        |        | *      |        |    |
| 3581025         | 3581750         | yvcA  |        |        | *      | *      |    |
| 3583377         | 3584114         | hisA  | *      |        |        |        |    |
| 3584111         | 3584749         | hisH  | *      |        |        |        |    |
| 3584750         | 3585334         | hisB  | *      |        |        |        |    |
| 3585331         | 3586614         | hisD  | *      |        |        |        |    |
| 3586611         | 3587252         | hisG  | *      |        |        |        |    |
| 3587245         | 3588420         | hisZ  | *      |        |        |        |    |
| 3601134         | 3601607         | yvnA  |        |        | *      |        |    |
| 3614146         | 3614376         | csbA  |        |        |        | *      |    |
| 3620678         | 3621016         | yvzD  | *      |        | *      | *      |    |
| 3633485         | 3633814         | yvyC  | *      |        | *      | *      |    |
| 3639315         | 3639581         | flgM  |        |        |        | *      |    |
| 3639692         | 3640111         | yvyF  |        |        | *      |        |    |
| 3640185         | 3640874         | comFC |        |        | *      |        |    |
| 3640841         | 3641137         | comFB |        |        |        | *      |    |
| 3641227         | 3642618         | comFA |        |        | *      |        |    |
| 3658149         | 3659639         | lytC  |        | *      | *      | *      | *  |
| 3659678         | 3661795         | lytB  |        | *      |        | *      | *  |
| 3661849         | 3662157         | lytA  | *      | *      |        | *      | *  |
| 3666269         | 3668971         | ggaB  | *      | *      | *      | *      | *  |
| 3669095         | 3670435         | ggaA  | *      | *      | *      | *      | *  |
| 3672624         | 3674207         | tagH  | *      | *      |        |        | *  |

| <i>Bacillus subtilis</i> |         |       | Ref | Ref | Ref | Ref | TW |
|--------------------------|---------|-------|-----|-----|-----|-----|----|
| begin                    | end     | gene  | 16  | 12  | 14  | 51  |    |
| 3674227                  | 3675054 | tagG  | *   | *   | *   |     | *  |
| 3675219                  | 3677459 | tagF  | *   | *   | *   | *   | *  |
| 3677459                  | 3679480 | tagE  | *   | *   | *   | *   | *  |
| 3679641                  | 3680030 | tagD  | *   | *   |     | *   | *  |
| 3680430                  | 3681200 | tagA  | *   | *   |     | *   | *  |
| 3681233                  | 3682378 | tagB  | *   | *   | *   | *   | *  |
| 3682498                  | 3683826 | tagC  | *   | *   | *   | *   | *  |
| 3683856                  | 3686498 | lytD  |     | *   |     |     | *  |
| 3689326                  | 3690432 | gerBB |     |     | *   |     |    |
| 3706171                  | 3706707 | ywsB  |     |     |     | *   |    |
| 3711644                  | 3712972 | ywrK  |     |     | *   | *   | *  |
| 3713029                  | 3713706 | ywrJ  |     |     | *   | *   | *  |
| 3713766                  | 3714908 | cotB  |     |     | *   | *   | *  |
| 3715036                  | 3716124 | cotH  |     |     |     |     | *  |
| 3716265                  | 3716852 | cotG  |     | *   |     |     | *  |
| 3717026                  | 3717643 | ywrF  |     |     |     |     | *  |
| 3717851                  | 3718186 | ywrE  | *   |     | *   |     |    |
| 3721062                  | 3721598 | ywrA  | *   |     |     |     |    |
| 3724203                  | 3724667 | ywqK  | *   |     | *   | *   |    |
| 3747771                  | 3747881 | usd   |     |     | *   |     |    |
| 3767845                  | 3768162 | ureA  | *   |     |     |     |    |
| 3769420                  | 3769899 | ywmF  |     |     | *   |     |    |
| 3778316                  | 3779056 | ywmB  |     |     |     | *   |    |
| 3780124                  | 3780522 | atpC  | *   |     |     |     |    |
| 3786675                  | 3787058 | atpI  |     |     | *   | *   |    |
| 3808603                  | 3808977 | spo0F | *   |     |     |     |    |
| 3829814                  | 3830533 | ywiC  |     |     | *   |     |    |
| 3835169                  | 3835321 | sboX  |     |     |     | *   |    |
| 3837605                  | 3838915 | ywhP  |     |     | *   |     |    |
| 3841347                  | 3842048 | ywhM  |     |     | *   |     |    |
| 3845054                  | 3846199 | rapF  |     |     | *   |     |    |
| 3846183                  | 3846302 | phrF  |     |     | *   | *   |    |
| 3898067                  | 3898600 | ywdE  |     |     | *   |     |    |
| 3898648                  | 3899139 | ywdD  |     |     | *   |     |    |
| 3899182                  | 3899610 | ywdC  |     |     | *   |     |    |
| 3911128                  | 3912309 | ywcF  |     |     | *   |     |    |
| 3922716                  | 3923024 | ywcB  |     |     | *   |     |    |
| 3936574                  | 3937251 | ywbB  |     |     |     | *   |    |
| 3981765                  | 3981965 | yxzE  |     |     | *   |     |    |
| 3988024                  | 3988665 | yxkC  | *   |     |     | *   |    |
| 3991954                  | 3993174 | yxjM  |     |     | *   |     |    |
| 3995621                  | 3995884 | yxjJ  |     |     | *   |     |    |
| 3996756                  | 3997778 | yxjH  | *   |     |     |     |    |
| 3998141                  | 3999145 | yxjG  | *   |     |     |     |    |
| 3999327                  | 4000100 | yxjF  | *   |     |     |     |    |
| 4000117                  | 4000767 | yxjE  | *   |     |     |     |    |

| <i>Bacillus</i> | <i>subtilis</i> | gene | Ref 16 | Ref 12 | Ref 14 | Ref 51 | TW |
|-----------------|-----------------|------|--------|--------|--------|--------|----|
| begin           | end             |      |        |        |        |        |    |
| 4000764         | 4001480         | yxjD | *      |        |        |        |    |
| 4001559         | 4002923         | yxjC | *      |        |        |        |    |
| 4017628         | 4017828         | yxjL |        |        | *      |        |    |
| 4018967         | 4019455         | yxjI |        |        |        | *      | *  |
| 4019473         | 4019925         | yxzG |        |        |        |        | *  |
| 4019995         | 4020324         | yxjH |        | *      |        |        | *  |
| 4020447         | 4020863         | yxjG |        |        | *      |        | *  |
| 4020914         | 4021282         | yxzC | *      | *      | *      |        | *  |
| 4021843         | 4022271         | yxjG |        |        | *      | *      |    |
| 4034779         | 4035087         | yxjE | *      |        |        | *      |    |
| 4035133         | 4035576         | yxjD |        |        | *      | *      |    |
| 4040272         | 4040727         | hutP | *      |        |        |        |    |
| 4046327         | 4047754         | hutM |        |        | *      |        |    |
| 4053144         | 4054256         | yxjR | *      |        |        |        |    |
| 4055660         | 4056802         | yxjP | *      |        |        |        |    |
| 4056819         | 4057568         | yxjO | *      |        |        |        |    |
| 4061119         | 4061346         | yxjJ |        |        | *      | *      |    |
| 4090271         | 4090522         | yxjA |        |        | *      |        |    |
| 4094935         | 4095927         | yxjC |        |        |        | *      |    |
| 4097170         | 4097439         | yxjA |        |        |        | *      |    |
| 4097216         | 4097698         | yxjB | *      |        |        | *      |    |
| 4099959         | 4101158         | yxjM |        |        | *      |        |    |
| 4122217         | 4122927         | yydK |        |        |        |        | *  |
| 4123428         | 4124150         | yydJ | *      | *      | *      | *      | *  |
| 4124171         | 4124800         | yydI | *      | *      | *      | *      | *  |
| 4124950         | 4125708         | yydH | *      | *      | *      | *      | *  |
| 4125689         | 4126648         | yydG | *      | *      | *      | *      | *  |
| 4126706         | 4126855         | yydF | *      | *      |        | *      | *  |
| 4127237         | 4129252         | fbp  |        | *      |        |        | *  |
| 4129786         | 4131546         | yydD | *      | *      | *      | *      | *  |
| 4131546         | 4131944         | yydC | *      | *      | *      | *      | *  |
| 4131937         | 4133382         | yydB | *      | *      | *      | *      | *  |
| 4133460         | 4133939         | yydA |        | *      |        |        | *  |
| 4134376         | 4134789         | yycS |        |        |        |        | *  |
| 4134823         | 4136049         | yycR |        |        |        |        | *  |
| 4136571         | 4136819         | yycQ |        |        |        |        | *  |
| 4168374         | 4168820         | yybP | *      |        |        |        |    |
| 4172322         | 4172759         | yybN | *      | *      | *      | *      | *  |
| 4172873         | 4173628         | yybM | *      | *      | *      | *      | *  |
| 4173618         | 4174328         | yybL | *      | *      | *      | *      | *  |
| 4174325         | 4175080         | yybK | *      | *      | *      | *      | *  |
| 4175077         | 4175733         | yybJ | *      | *      | *      | *      | *  |
| 4175924         | 4176712         | yybI |        | *      |        |        | *  |
| 4176780         | 4177169         | yybH |        |        |        |        | *  |
| 4183041         | 4183487         | yyaT |        |        |        |        | *  |
| 4183484         | 4184089         | yyaS |        | *      | *      |        | *  |

| <i>Bacillus subtilis</i> |         | gene | Ref | Ref | Ref | Ref | TW |
|--------------------------|---------|------|-----|-----|-----|-----|----|
| begin                    | end     |      | 16  | 12  | 14  | 51  |    |
| 4184184                  | 4184705 | yyaR | *   | *   | *   | *   | *  |
| 4185116                  | 4185656 | yyaQ | *   | *   | *   |     | *  |
| 4185816                  | 4186382 | yyaP | *   | *   | *   | *   | *  |
| 4186889                  | 4188265 | tetB | *   | *   | *   | *   | *  |
| 4188115                  | 4188177 | tetL |     | *   |     | *   | *  |
| 4188614                  | 4188853 | yyaO | *   | *   |     | *   | *  |
| 4189004                  | 4189420 | yyaN | *   | *   | *   | *   | *  |
| 4189417                  | 4190334 | yyaM | *   | *   | *   | *   | *  |
| 4214463                  | 4214597 | rpmH |     |     | *   |     |    |
