# Supplementary material
Source: PubMed Central journal article supplement (PMC546175)
Supplement: nar_33_1_e6__4.pdf [file nar_33_1_e6__4.pdf]

## Annex 4: Potential donors for every RNA-free atypical region (*Haemophilus influenzae*)

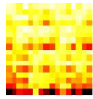

*st Haemophilus influenzae*

| Position (Kb)<br>Distances from host (AU) | Signature of original region | Signature of 1 st potential donor | Potential donors<br>sequence length                                                                                                                                                                                                            | Distances from outlier (AU)     | Position (Kb)<br>Distances from host (AU) | Signature of original region | Signature of 1 st potential donor | Potential donors<br>sequence length                                                                                                                                                                                    | Distances from outlier (AU)     |
|-------------------------------------------|------------------------------|-----------------------------------|------------------------------------------------------------------------------------------------------------------------------------------------------------------------------------------------------------------------------------------------|---------------------------------|-------------------------------------------|------------------------------|-----------------------------------|------------------------------------------------------------------------------------------------------------------------------------------------------------------------------------------------------------------------|---------------------------------|
| 51.751-52.750<br>350                      |                              |                                   | <i>Prochlorococcus marinus</i><br>1751080 nt<br><i>Borrelia burgdorferi</i><br>910724 nt<br><i>Borrelia burgdorferi</i> cp32-1<br>30750 nt<br><i>Borrelia burgdorferi</i> cp32-8<br>30885 nt<br><i>Borrelia burgdorferi</i> cp32-3<br>30223 nt | 184<br>205<br>207<br>208<br>209 | 919.251-925.250<br>363                    |                              |                                   | <i>S. aureus</i> pETB<br>38211 nt<br><i>M. jannaschii</i> extra2<br>58407 nt<br><i>S. aureus</i> pN315B<br>24653 nt<br><i>Mesostigma viride</i> chloro<br>118360 nt<br><i>S. aureus</i> 21kb pl<br>20719 nt            | 144<br>155<br>159<br>159<br>163 |
| 120.251-121.250<br>374                    |                              |                                   | <i>Mesostigma viride</i><br>1782 nt<br><b>no credible donor</b><br><b>distance too great</b>                                                                                                                                                   | 243                             | 1302.251-1303.250<br>445                  |                              |                                   | <i>Photobacterium profundum</i><br>37976 nt<br><b>no credible donor</b><br><b>distance too large</b>                                                                                                                   | 339                             |
| 285.751-287.250<br>283                    |                              |                                   | <i>Staphylococcus hominis</i><br>24362 nt<br><i>Odontella sinensis</i><br>119630 nt<br><i>Staphylococcus haemolyticus</i><br>22162 nt<br><i>G theta</i><br>196216 nt<br><i>S. aureus</i> pVRSAp<br>25107 nt                                    | 200<br>205<br>208<br>210<br>217 | 1561.751-1564.250<br>327                  |                              |                                   | <i>M. haemolytica</i> pMHSCS1<br>4992 nt<br><b>no credible donor</b><br><b>distance too great</b>                                                                                                                      | 242                             |
| 532.251-533.250<br>316                    |                              |                                   | <i>Listeria murrayi</i><br>3186 nt<br><b>no credible donor</b><br><b>distance too great</b>                                                                                                                                                    | 276                             | 1571.251-1589.750<br>292                  |                              |                                   | <i>Vibrio cholerae</i> CHR2<br>1072315 nt<br><i>Shewanella putrefasciens</i><br>43518 nt<br><i>Vibrio vulnificus</i><br>60853 nt<br><i>Vibrio cholerae</i> CHR1<br>2961149 nt<br><i>Bacteriophage</i> K139<br>33106 nt | 159<br>160<br>167<br>168<br>168 |
| 534.751-535.250<br>351                    |                              |                                   | <i>Pediococcus pentosaceus</i><br>26400 nt<br><b>no credible donor</b><br><b>distance too great</b>                                                                                                                                            | 334                             | 1766.751-1769.250<br>361                  |                              |                                   | <i>C. paradoxa</i> cyanelle<br>135599 nt<br><i>Borrelia burgdorferi</i><br>910724 nt<br><i>Cyanidioschyzon merolae</i><br>18828 nt<br><i>Tribolium castaneum</i><br>15841 nt<br><i>Mesostigma viride</i><br>1782 nt    | 198<br>210<br>211<br>213<br>216 |
| 597.751-599.250<br>356                    |                              |                                   | <i>Desulfosporosinus orientis</i><br>1800 nt<br><b>no credible donor</b><br><b>distance too great</b>                                                                                                                                          | 261                             | 1806.251-1807.250<br>366                  |                              |                                   | <i>Colwellia maris</i><br>14959 nt<br><b>no credible donor</b><br><b>distance too great</b>                                                                                                                            | 292                             |
| 839.751-841.250<br>328                    |                              |                                   | <i>Colwellia maris</i><br>14959 nt<br><i>Moritella marina</i><br>46068 nt                                                                                                                                                                      | 216<br>243                      |                                           |                              |                                   |                                                                                                                                                                                                                        |                                 |
