# Supplementary material
Source: PubMed Central journal article supplement (PMC546175)
Supplement: nar_33_1_e6__5.pdf [file nar_33_1_e6__5.pdf]

**Annex 5:** Gene-based comparison of horizontal gene transfers detected by Garcia-Vallve *et al.* [16], Nakamura et al [14] and this work (TW, threshold 99 %) for *H influenzae*. Columns are self-explanatory. A star indicates a detected gene. Yellow indicates genes detected by both methods, green indicates gene detected only by our approach, NF = no feature found in GIB database.

| <i>H influenzae</i> |        |          | Ref | Ref | TW |
|---------------------|--------|----------|-----|-----|----|
| begin               | end    | gene     | 16  | 14  |    |
| 11857               | 12261  | HI0011   | *   |     |    |
| 42335               | 42823  | HI0039   |     | *   |    |
| 48991               | 49848  | HI0048   | *   |     |    |
| 49848               | 50792  | HI0049   | *   |     |    |
| 50812               | 52068  | -        | *   |     | *  |
| 52092               | 52589  | HI0051   | *   | *   | *  |
| 52628               | 53614  | HI0052   | *   |     | *  |
| 53641               | 54669  | HI0053   | *   |     |    |
| 54779               | 55579  | HI0054   | *   |     |    |
| 63196               | 65562  | HI0061   |     | *   |    |
| 79805               | 80245  | HI0074   | *   |     |    |
| 86575               | 87006  | HI0080   | *   | *   |    |
| 108243              | 108683 | HI0101   |     | *   |    |
| 117319              | 117660 | HI0109   | *   |     |    |
| 119451              | 120080 | HI0111   |     |     | *  |
| 120092              | 120388 | HI0112   |     | *   | *  |
| 120441              | 122675 | HI0113   |     | *   | *  |
| 122901              | 123017 | HI0114   |     | *   |    |
| 134970              | 135476 | HI0120   |     | *   |    |
| 147842              | 149017 | HI0134   |     | *   |    |
| 152492              | 153262 | HI0137   |     | *   |    |
| 165924              | 166130 | HI0148.1 |     | *   |    |
| 168629              | 169336 | HI0152   |     | *   |    |
| 175056              | 175580 | HI0159   | *   |     |    |
| 190826              | 191308 | HI0178   |     | *   |    |
| 219308              | 220081 | HI0205   |     | *   |    |
| 223852              | 224712 | HI0209   |     | *   |    |
| 225688              | 225795 | HI0210   |     | *   |    |
| 229286              | 229477 | HI0213.1 |     | *   |    |
| 241428              | 242072 | HI0220.2 |     | *   |    |
| 252758              | 253660 | HI0223   |     | *   |    |
| 257623              | 257997 | HI0228   | *   | *   |    |
| 265270              | 265416 | HI0234   |     | *   |    |
| 270799              | 271020 | HI0242   |     | *   |    |
| 284998              | 285465 | HI0254   |     |     | *  |
| 285566              | 286462 | HI0255   |     |     | *  |
| 286573              | 287220 | HI0256   |     |     | *  |
| 287390              | 287713 | HI0257   |     |     | *  |
| 288442              | 289434 | HI0258   | *   | *   |    |

| <i>H influenzae</i> |        |          | Ref | Ref | TW |
|---------------------|--------|----------|-----|-----|----|
| debut               | fin    | gene     | 16  | 14  |    |
| 312108              | 312593 | HI0277   | *   |     |    |
| 315850              | 316593 | HI0282   | *   |     |    |
| 330350              | 331042 | HI0296   | *   |     |    |
| 343715              | 344002 | HI0310   | *   |     |    |
| 347265              | 347741 | HI0316   | *   |     |    |
| 354711              | 354974 | HI0326   | *   |     |    |
| 363479              | 363835 | HI0335   | *   |     |    |
| 363918              | 364511 | HI0336   | *   |     |    |
| 369588              | 369929 | HI0342   | *   |     |    |
| 379232              | 379927 | HI0352   | *   |     |    |
| 381362              | 382099 | HI0355   | *   |     |    |
| 406265              | 406675 | HI0386   | *   |     |    |
| 414231              | 414968 | HI0392   | *   |     |    |
| 443510              | 443674 | HI0421   | *   |     |    |
| 453698              | 454108 | HI0430   | *   | *   |    |
| 456269              | 456958 | HI0434   | *   |     |    |
| 498245              | 498397 | HI0476   | *   |     |    |
| 506303              | 506677 | HI0485.1 | *   |     |    |
| 508649              | 509122 | HI0489   | *   |     |    |
| 510454              | 510810 | HI0493   | *   |     |    |
| 528159              | 528935 | HI0512   | *   |     |    |
| 528932              | 530488 | HI0513   | *   |     |    |
| 530561              | 534808 | HI0514   |     | *   |    |
| 535050              | 539081 | HI0515   |     | *   |    |
| 542912              | 543700 | HI0520   | *   |     |    |
| 545466              | 546122 | HI0522   | *   |     |    |
| 549638              | 550456 | HI0526   | *   |     |    |
| 560041              | 560826 | HI0535   | *   |     |    |
| 560901              | 561578 | HI0536   | *   |     |    |
| 561681              | 562265 | HI0537   | *   |     |    |
| 562373              | 562930 | HI0538   | *   |     |    |
| 563058              | 564776 | HI0539   | *   |     |    |
| 564788              | 565093 | HI0540   | *   |     |    |
| 565169              | 565471 | HI0541   | *   |     |    |
| 565634              | 565924 | HI0542   | *   |     |    |
| 570690              | 571598 | HI0550   | *   |     |    |
| 575203              | 575745 | HI0554   | *   |     |    |
| 575870              | 576109 | HI0555   | *   |     |    |
| 579332              | 579679 | HI0559.1 | *   |     |    |
| 581951              | 582346 | HI0562   | *   |     |    |
| 596079              | 596366 | HI0577   | *   |     |    |
| 596497              | 597681 | HI0578   |     | *   |    |
| 597746              | 599848 | HI0579   |     | *   |    |
| 599932              | 600402 | HI0580   |     | *   |    |
| 615037              | 615231 | HI0592   | *   |     |    |
| 620572              | 621054 | HI0597.1 | *   |     |    |

| <i>H influenzae</i> |         |          | Ref | Ref | TW |
|---------------------|---------|----------|-----|-----|----|
| debut               | fin     | gene     | 16  | 14  |    |
| 622876              | 623529  | HI0601   | *   | *   |    |
| 643446              | 643880  | HI0612   |     | *   |    |
| 673197              | 673493  | HI0633   |     | *   |    |
| 700107              | 700643  | HI0656.1 |     | *   |    |
| 703648              | 706680  | HI0661   |     | *   |    |
| 711673              | 711993  | HI0666   |     | *   |    |
| 721436              | 722332  | HI0680   |     | *   |    |
| 731614              | 732528  | HI0687   |     | *   |    |
| 732623              | 732934  | HI0688   |     | *   |    |
| 811891              | 812388  | HI0751   |     | *   |    |
| 837567              | 838514  | HI0775   |     | *   |    |
| 838705              | 839061  | HI0776   |     |     | *  |
| 839078              | 839704  | HI0777   |     |     | *  |
| 839720              | 840322  | HI0778   |     |     | *  |
| 840319              | 840618  | HI0779   |     |     | *  |
| 840636              | 841457  | HI0780   |     |     | *  |
| 841483              | 841758  | HI0781   | *   | *   |    |
| 841770              | 842102  | HI0782   |     |     | *  |
| 844090              | 844695  | HI0787   |     | *   |    |
| 853827              | 854216  | HI0804   | *   |     |    |
| 892798              | 893376  | HI0844   |     | *   |    |
| 896738              | 897172  | HI0850   |     | *   |    |
| 902362              | 902709  | HI0855   |     | *   |    |
| 918515              | 919138  | HI0866   | *   | *   | *  |
| 919376              | 920590  | HI0867   | *   | *   | *  |
| 920571              | 921323  | HI0868   | *   | *   | *  |
| 921289              | 921846  | HI0869   | *   |     | *  |
| 922991              | 923281  | HI0870.1 | *   | *   | *  |
| 923293              | 924213  | HI0871   | *   | *   | *  |
| 924206              | 925621  | HI0872   | *   | *   | *  |
| 926749              | 927948  | HI0874   |     | *   |    |
| 932383              | 932694  | HI0880   |     | *   |    |
| 997258              | 997770  | HI0938   |     | *   |    |
| 998486              | 999169  | HI0940   |     | *   |    |
| 999144              | 999449  | HI0941   |     | *   |    |
| 1018029             | 1018379 | HI0960   |     | *   |    |
| 1025442             | 1025546 | HI0967   |     | *   |    |
| 1030275             | 1031144 | HI0973   |     | *   |    |
| 1060231             | 1062108 | HI0995   |     | *   |    |
| 1062206             | 1062646 | HI0996   |     | *   |    |
| 1069855             | 1071414 | HI1005   |     | *   |    |
| 1073118             | 1073456 | HI1008   |     | *   |    |
| 1083776             | 1085392 | HI1020   |     | *   |    |
| 1095485             | 1095970 | HI1030   |     | *   |    |
| 1102513             | 1102785 | HI1037.1 |     | *   |    |
| 1104411             | 1105415 | HI1040   |     | *   |    |

| <i>H influenzae</i> |         |          | Ref | Ref | TW |
|---------------------|---------|----------|-----|-----|----|
| debut               | fin     | gene     | 16  | 14  |    |
| 1105412             | 1106326 | HI1041   | *   |     |    |
| 1108431             | 1108931 | HI1043   | *   |     |    |
| 1109654             | 1110493 | HI1045   | *   |     |    |
| 1114948             | 1115241 | HI1049   | *   |     |    |
| 1121801             | 1123690 | HI1056   | *   |     |    |
| 1123464             | 1124048 | HI1058   | *   |     |    |
| 1127596             | 1129053 | HI1064   | *   |     |    |
| 1161103             | 1161237 | HI1098   | *   |     |    |
| 1161239             | 1161547 | HI1099   | *   | *   |    |
| 1193834             | 1194064 | HI1126   | *   |     |    |
| 1218171             | 1218800 | HI1150   | *   |     |    |
| 1231372             | 1231845 | HI1162   | *   |     |    |
| 1239765             | 1240331 | HI1169   | *   |     |    |
| 1243518             | 1243988 | HI1173   | *   |     |    |
| 1244741             | 1244962 | HI1176   | *   |     |    |
| 1249536             | 1249712 | HI1183   | *   |     |    |
| 1274958             | 1275848 | HI1208   | *   |     |    |
| 1300547             | 1301983 | HI1231   |     |     | *  |
| 1302097             | 1303800 | HI1232   |     |     | *  |
| 1303863             | 1306523 | HI1233   |     |     | *  |
| 1306823             | 1307281 | HI1234   | *   |     |    |
| 1317218             | 1317838 | HI1244   | *   |     |    |
| 1325143             | 1326111 | HI1248   | *   |     |    |
| 1327059             | 1327364 | HI1250   | *   |     |    |
| 1327375             | 1327698 | HI1251   | *   | *   |    |
| 1329939             | 1331000 | HI1254   | *   |     |    |
| 1331444             | 1331908 | HI1256   | *   |     |    |
| 1339751             | 1340485 | HI1262   | *   |     |    |
| 1346844             | 1347230 | HI1266   | *   |     |    |
| 1356988             | 1357263 | HI1280   | *   |     |    |
| 1366454             | 1367833 | HI1286   | *   |     |    |
| 1367826             | 1369157 | HI1287   | *   |     |    |
| 1387117             | 1387365 | HI1309   | *   |     |    |
| 1394078             | 1394893 | HI1317   | *   |     |    |
| 1395026             | 1395568 | infC     | *   |     |    |
| 1406758             | 1407129 | HI1328.1 | *   |     |    |
| 1407095             | 1407406 | HI1329   | *   |     |    |
| 1474351             | 1475628 | HI1378   | *   |     |    |
| 1475625             | 1476320 | HI1379   | *   |     |    |
| 1476415             | 1477183 | pstB     | *   |     |    |
| 1477193             | 1478041 | HI1381   | *   | *   |    |
| 1478043             | 1478990 | HI1382   | *   |     |    |
| 1479081             | 1480084 | pstS     | *   |     |    |
| 1480541             | 1481089 | HI1384   | *   |     |    |
| 1481105             | 1481602 | HI1385   | *   |     |    |
| 1481976             | 1482422 | HI1386   | *   | *   |    |

| <i>H influenzae</i> |         |          | Ref | Ref | TW |
|---------------------|---------|----------|-----|-----|----|
| debut               | fin     | gene     | 16  | 14  |    |
| 1484727             | 1485113 | HI1388.1 | *   |     |    |
| 1490870             | 1491799 | HI1392   |     | *   |    |
| 1491780             | 1492682 | HI1393   |     | *   |    |
| 1493223             | 1493645 | HI1395   | *   |     |    |
| 1506035             | 1506550 | HI1411   |     | *   |    |
| 1507209             | 1507490 | HI1413   |     | *   |    |
| 1508241             | 1508597 | HI1416   | *   |     |    |
| 1510582             | 1510860 | HI1421   |     | *   |    |
| 1511013             | 1511588 | HI1422   | *   |     |    |
| 1512159             | 1513073 | HI1424   |     | *   |    |
| 1523361             | 1523531 | HI1434.2 |     | *   |    |
| 1523684             | 1524232 | HI1435   |     | *   |    |
| 1524226             | 1524546 | HI1436   |     | *   |    |
| 1526016             | 1526180 | HI1436.2 |     | *   |    |
| 1530546             | 1530938 | HI1442   |     | *   |    |
| 1533645             | 1533968 | HI1446   | *   | *   |    |
| 1540419             | 1540925 | HI1456   |     | *   |    |
| 1541711             | 1541953 | HI1458   |     | *   |    |
| 1555042             | 1555803 | HI1470   |     | *   |    |
| 1555796             | 1556809 | HI1471   |     | *   |    |
| 1559375             | 1559734 | HI1475   |     | *   |    |
| 1559962             | 1560681 | HI1476   | *   |     |    |
| 1560909             | 1561178 | HI1477   |     |     | *  |
| 1561212             | 1563275 | HI1478   |     |     | *  |
| 1563332             | 1563604 | HI1479   |     |     | *  |
| 1563537             | 1564007 | HI1480   |     |     | *  |
| 1564041             | 1564904 | HI1481   |     |     | *  |
| 1564965             | 1565282 | HI1482   |     |     | *  |
| 1566833             | 1567393 | HI1487   |     | *   |    |
| 1567567             | 1568124 | HI1488   |     | *   |    |
| 1568121             | 1568675 | HI1489   |     | *   |    |
| 1568867             | 1569082 | HI1490   |     | *   |    |
| 1569082             | 1569300 | HI1491   |     | *   |    |
| 1569309             | 1569815 | HI1492   |     | *   |    |
| 1569897             | 1570181 | HI1493   |     | *   |    |
| 1570091             | 1570441 | HI1494   | *   |     | *  |
| 1570448             | 1570708 | HI1495   | *   |     | *  |
| 1570705             | 1570959 | HI1496   | *   |     | *  |
| 1571077             | 1571304 | HI1497   | *   |     | *  |
| 1571211             | 1571630 | HI1498   | *   | *   | *  |
| 1571635             | 1571943 | HI1498.1 | *   |     | *  |
| 1571955             | 1572524 | HI1499   | *   |     | *  |
| 1572524             | 1574050 | HI1500   | *   |     | *  |
| 1574062             | 1575624 | HI1501   | *   |     | *  |
| 1575715             | 1576959 | HI1502   | *   |     | *  |
| 1577097             | 1577537 | HI1503   | *   |     | *  |

| <i>H influenzae</i> |         |          | Ref | Ref | TW |
|---------------------|---------|----------|-----|-----|----|
| debut               | fin     | gene     | 16  | 14  |    |
| 1577768             | 1578835 | HI1504   | *   |     | *  |
| 1578835             | 1579761 | HI1505   | *   |     | *  |
| 1579844             | 1580101 | HI1506   | *   |     | *  |
| 1580113             | 1580229 | HI1507   | *   |     | *  |
| 1580232             | 1580657 | HI1508   | *   |     | *  |
| 1580624             | 1581208 | HI1509   | *   |     | *  |
| 1581412             | 1582875 | HI1511   | *   |     | *  |
| 1582885             | 1583241 | HI1512   | *   |     | *  |
| 1583254             | 1583637 | HI1513   | *   |     | *  |
| 1583718             | 1585613 | HI1514   | *   |     | *  |
| 1585613             | 1586980 | HI1515   | *   |     | *  |
| 1586980             | 1588240 | -        | *   |     | *  |
| 1588277             | 1588825 | HI1518   | *   |     | *  |
| 1588834             | 1589241 | HI1519   | *   |     | *  |
| 1589241             | 1590308 | HI1520   | *   |     | *  |
| 1590394             | 1590900 | HI1521   | *   | *   | *  |
| 1593255             | 1593374 | HI1522.1 |     | *   |    |
| 1593385             | 1594275 | HI1523   |     | *   |    |
| 1594439             | 1594591 | HI1524   |     | *   |    |
| 1609583             | 1610461 | HI1538   |     | *   |    |
| 1610458             | 1611159 | HI1539   |     | *   |    |
| 1611159             | 1611956 | HI1540   |     | *   |    |
| 1617353             | 1617775 | HI1546   |     | *   |    |
| 1621835             | 1622617 | HI1551   |     | *   |    |
| 1633312             | 1633491 | HI1564.1 |     | *   |    |
| 1634710             | 1636722 | HI1567   |     | *   |    |
| 1636791             | 1637207 | HI1568   | *   |     |    |
| 1637331             | 1637483 | HI1569   |     | *   |    |
| 1637480             | 1637989 | HI1570   | *   |     |    |
| 1646128             | 1646346 | HI1577   |     | *   |    |
| 1646702             | 1647673 | HI1578   | *   | *   |    |
| 1648637             | 1648810 | HI1581   |     | *   |    |
| 1648798             | 1649217 | HI1582   | *   | *   |    |
| 1662062             | 1662217 | HI1593   |     | *   |    |
| 1662937             | 1663260 | HI1595   |     | *   |    |
| 1686922             | 1687425 | HI1620   |     | *   |    |
| 1693148             | 1693720 | HI1631   |     | *   |    |
| 1713517             | 1714044 | HI1648   |     | *   |    |
| 1716772             | 1717050 | HI1651   |     | *   |    |
| 1723036             | 1723620 | HI1657   |     | *   |    |
| 1734144             | 1734527 | HI1666   | *   |     |    |
| 1739016             | 1740266 | HI1671   |     | *   |    |
| 1765866             | 1766750 | HI1696   | *   |     | *  |
| 1766762             | 1767535 | HI1697   | *   |     | *  |
| 1767547             | 1768608 | HI1698   | *   |     | *  |
| 1768610             | 1769524 | HI1699   | *   | *   | *  |

| <i>H influenzae</i> |         |        | Ref | Ref | TW |
|---------------------|---------|--------|-----|-----|----|
| debut               | fin     | gene   | 16  | 14  |    |
| 1769521             | 1770735 | HI1700 | *   | *   | *  |
| 1770861             | 1771604 | HI1701 | *   |     |    |
| 1793079             | 1793645 | HI1720 |     | *   |    |
| 1793813             | 1794463 | HI1721 |     | *   |    |
| 1805501             | 1808000 |        |     |     |    |
