# Supplementary material
Source: PubMed Central journal article supplement (PMC546175)
Supplement: nar_33_1_e6__6.pdf [file nar_33_1_e6__6.pdf]

## Annex 6: Potential donors for every RNA-free atypical region (*Escherichia coli*)

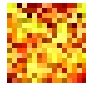

Host *Escherichia coli* signature

| Position (kb)   | Signature of original regions | Signature of 1 th potential donors | Potential donors                             | Distances from outliers (AU) | Position (kb)     | Signature of original regions | Signature of 1 th potential donors | Potential donors                               | Distances from outliers (AU) |
|-----------------|-------------------------------|------------------------------------|----------------------------------------------|------------------------------|-------------------|-------------------------------|------------------------------------|------------------------------------------------|------------------------------|
| 264             |                               |                                    | <i>Enterobacter aerogenes</i> 53338 nt       | 227                          | 2036.750-2042.250 |                               |                                    | <i>Shigella boydii</i> 65724 nt                | 125                          |
|                 |                               |                                    | <i>Enterobacter cloacae</i> 44626 nt         | 238                          |                   |                               |                                    | <i>Y enterocolitica</i> pYVe8081 68784 nt      | 129                          |
| 150.750-155.750 |                               |                                    | <i>Salmonella enterica</i> pHCM2 107965 nt   | 242                          | 2052.250-2058.250 |                               |                                    | <i>Y enterocolitica</i> pYVe22 70761 nt        | 130                          |
|                 |                               |                                    |                                              |                              |                   |                               |                                    | <i>Yersinia enterocolitica</i> 4761721 nt      | 131                          |
| 258             |                               |                                    | <i>Enterobacter aerogenes</i> 5770353 nt     | 127                          | 2067.250-2074.750 |                               |                                    | <i>Escherichia coli</i> pIR721 76758 nt        | 131                          |
|                 |                               |                                    | <i>Y pseudotuberculosis</i> 4812537 nt       | 129                          |                   |                               |                                    | <i>Yersinia enterocolitica</i> pIR721 76758 nt | 131                          |
| 235.750-239.250 |                               |                                    | <i>Y enterocolitica</i> pYVe8081 68784 nt    | 131                          | 2099.250-2110.750 |                               |                                    | <i>Yersinia pestis</i> pCD1 71656 nt           | 129                          |
|                 |                               |                                    | <i>Yersinia pestis</i> pCD1 71656 nt         | 132                          |                   |                               |                                    | <i>Yersinia pestis</i> pL2 71601 nt            | 129                          |
| 284             |                               |                                    | <i>Citrobacter rodentium</i> 5553284 nt      | 135                          | 2185.750-2190.750 |                               |                                    | <i>S typhimurium</i> pSLT 95224 nt             | 153                          |
|                 |                               |                                    | <i>Escherichia coli</i> pR721 76758 nt       | 143                          |                   |                               |                                    | <i>Salmonella enterica</i> pvir 50334 nt       | 172                          |
| 303             |                               |                                    | <i>Y pseudotuberculosis</i> 4812537 nt       | 153                          | 2386.250-2386.250 |                               |                                    | <i>S entomophila</i> pADAP 107744 nt           | 176                          |
|                 |                               |                                    | <i>Shigella sonnei</i> 81822 nt              | 153                          |                   |                               |                                    | <i>Shigella sonnei</i> pCollb-P9 94799 nt      | 181                          |
| 347             |                               |                                    | <i>Yersinia enterocolitica</i> 4761721 nt    | 157                          | 2460.250-2463.750 |                               |                                    | <i>Morganella morganii</i> 20046 nt            | 189                          |
|                 |                               |                                    | <i>Pantoea citrea</i> 19972 nt               | 258                          |                   |                               |                                    | <i>no credible donor</i>                       |                              |
| 280.750-288.750 |                               |                                    | <i>no credible donor</i>                     |                              | 2464.750-2469.750 |                               |                                    | <i>Shigella sonnei</i> 81822 nt                | 93                           |
|                 |                               |                                    |                                              |                              |                   |                               |                                    | <i>Citrobacter rodentium</i> 5553284 nt        | 104                          |
| 291.250-295.750 |                               |                                    | <i>Vibrio anguillarum</i> 39151 nt           | 120                          | 2478.750-2492.750 |                               |                                    | <i>Legionella pneumophila</i> 235834 nt        | 122                          |
|                 |                               |                                    | <i>Enterococcus faecium</i> 105144 nt        | 128                          |                   |                               |                                    | <i>Enterococcus faecium</i> 105144 nt          | 128                          |
| 377             |                               |                                    | <i>Y pseudotuberculosis</i> 4812537 nt       | 151                          | 2492.750-2492.750 |                               |                                    | <i>Yersinia enterocolitica</i> 4761721 nt      | 163                          |
|                 |                               |                                    | <i>Ralstonia solanacearum</i> pJTPS1 6823 nt | 166                          |                   |                               |                                    | <i>Yersinia enterocolitica</i> 4761721 nt      | 163                          |
| 324             |                               |                                    | <i>Pseudomonas ADP</i> pADP-1 110513 nt      | 167                          | 2492.750-2492.750 |                               |                                    | <i>Photobacterium luminescens</i> 5770353 nt   | 164                          |
|                 |                               |                                    | <i>Burkholderia gladioli</i> 11784 nt        | 169                          |                   |                               |                                    | <i>Plesiomonas shigelloides</i> 44392 nt       | 174                          |
| 310.250-320.250 |                               |                                    | <i>Pseudomonas stutzeri</i> 179397 nt        | 169                          | 2492.750-2492.750 |                               |                                    | <i>Citrobacter rodentium</i> 5553284 nt        | 177                          |
|                 |                               |                                    | <i>Microscilla sp</i> pSD15 103185 nt        | 146                          |                   |                               |                                    | <i>Yersinia enterocolitica</i> 4761721 nt      | 122                          |
| 332             |                               |                                    | <i>Citrobacter rodentium</i> 5553284 nt      | 148                          | 2492.750-2492.750 |                               |                                    | <i>Y pseudotuberculosis</i> 4812537 nt         | 124                          |
|                 |                               |                                    | <i>Escherichia coli</i> pR721 76758 nt       | 149                          |                   |                               |                                    | <i>Citrobacter rodentium</i> 5553284 nt        | 127                          |
| 326             |                               |                                    | <i>Salmonella typhi</i> pR27 38875 nt        | 154                          | 2492.750-2492.750 |                               |                                    | <i>Photobacterium luminescens</i> 5770353 nt   | 131                          |
|                 |                               |                                    | <i>Y enterocolitica</i> pYVe8081 68784 nt    | 157                          |                   |                               |                                    | <i>Xenorhabdus nematophilus</i> 136208 nt      | 137                          |
| 333.250-333.750 |                               |                                    | <i>Xenorhabdus nematophilus</i> 136208 nt    | 92                           | 2492.750-2492.750 |                               |                                    | <i>Shigella boydii</i> 65724 nt                | 151                          |
|                 |                               |                                    | <i>Shigella boydii</i> 65724 nt              | 104                          |                   |                               |                                    | <i>Salmonella typhi</i> pR27 38875 nt          | 152                          |
| 361             |                               |                                    | <i>Photobacterium luminescens</i> 5770353 nt | 111                          | 2492.750-2492.750 |                               |                                    | <i>Yersinia enterocolitica</i> 4761721 nt      | 152                          |
|                 |                               |                                    | <i>Yersinia enterocolitica</i> 4761721 nt    | 113                          |                   |                               |                                    | <i>Bacteriophage</i> APSE-1 37119 nt           | 153                          |
| 338.250-339.250 |                               |                                    | <i>Shigella flexneri</i> pvir 216642 nt      | 118                          | 2492.750-2492.750 |                               |                                    | <i>Y enterocolitica</i> pYVe8081 68784 nt      | 154                          |
|                 |                               |                                    | <i>Salmonella enterica</i> 4824399 nt        | 337                          |                   |                               |                                    | <i>no credible donor</i>                       |                              |
| 417             |                               |                                    | <i>no credible donor</i>                     |                              | 2492.750-2492.750 |                               |                                    | <i>Shigella sonnei</i> 81822 nt                | 126                          |
|                 |                               |                                    | <i>no credible donor</i>                     |                              |                   |                               |                                    | <i>Bacteroides fragilis</i> 278172 nt          | 133                          |
| 417             |                               |                                    | <i>no credible donor</i>                     |                              | 2492.750-2492.750 |                               |                                    | <i>Citrobacter rodentium</i> 5553284 nt        | 134                          |
|                 |                               |                                    | <i>Bordetella avium</i> 26676 nt             | 310                          |                   |                               |                                    | <i>Paenibacillus popilliae</i> 13918 nt        | 141                          |
| 417             |                               |                                    | <i>no credible donor</i>                     |                              | 2492.750-2492.750 |                               |                                    | <i>Y pseudotuberculosis</i> 4812537 nt         | 143                          |
|                 |                               |                                    | <i>no credible donor</i>                     |                              |                   |                               |                                    | <i>Yersinia enterocolitica</i> 4761721 nt      | 100                          |
| 417             |                               |                                    | <i>no credible donor</i>                     |                              | 2492.750-2492.750 |                               |                                    | <i>Photobacterium luminescens</i> 5770353 nt   | 114                          |
|                 |                               |                                    | <i>no credible donor</i>                     |                              |                   |                               |                                    | <i>Y enterocolitica</i> pYVe8081 68784 nt      | 115                          |
| 417             |                               |                                    | <i>no credible donor</i>                     |                              | 2492.750-2492.750 |                               |                                    | <i>Y enterocolitica</i> pYVe22 70761 nt        | 116                          |
|                 |                               |                                    | <i>no credible donor</i>                     |                              |                   |                               |                                    | <i>Y enterocolitica</i> pYVe22 70761 nt        | 116                          |

|                        |                                                                                                                                                                         |                                                                                                                                                                                                                              |                                 |                          |                                                                                                                                                                          |                                                                                                                                                                                                                                           |                                 |
|------------------------|-------------------------------------------------------------------------------------------------------------------------------------------------------------------------|------------------------------------------------------------------------------------------------------------------------------------------------------------------------------------------------------------------------------|---------------------------------|--------------------------|--------------------------------------------------------------------------------------------------------------------------------------------------------------------------|-------------------------------------------------------------------------------------------------------------------------------------------------------------------------------------------------------------------------------------------|---------------------------------|
| 390.750-392.250<br>241 |       | <i>Salmonella enterica</i> pvir<br>50334 nt<br>Bacteriophage Mu<br>37311 nt<br><i>S typhimurium</i> pSLT<br>95224 nt<br><i>Erwinia amylovora</i> pEA29<br>28683 nt<br><i>Erwinia herbicola</i><br>55809 nt                   | 220<br>229<br>230<br>232<br>233 | 2565.750-2566.250<br>457 |       | <i>Serratia marcescens</i><br>5199066 nt<br><br>no credible donor                                                                                                                                                                         | 418                             |
| 521.250-528.750<br>198 |       | <i>S typhimurium</i> pSLT<br>95224 nt<br><i>S entomophila</i> pADAP<br>107744 nt<br><i>Salmonella enterica</i> pvir<br>50334 nt<br><i>Salmonella dublin</i><br>38857 nt<br><i>Escherichia coli</i> pCloDF13<br>10182 nt      | 145<br>147<br>150<br>160<br>167 | 2753.750-2765.250<br>233 |       | <i>Yersinia pestis</i> pCD1<br>71656 nt<br><i>Yersinia pestis</i> pl_2<br>71601 nt<br><i>Salmonella typhi</i> pR27<br>38875 nt<br><i>Y enterocolitica</i> pYVe22<br>70761 nt<br><i>Y enterocolitica</i> pYVe8081<br>68784 nt              | 110<br>110<br>112<br>113<br>115 |
| 559.250-561.250<br>214 |       | <i>Yersinia ruckeri</i><br>11491 nt<br><i>Yersinia pestis</i><br>4731311 nt<br><i>Kluyvera cryocrescens</i><br>10108 nt<br><i>Erwinia carotovora</i><br>91889 nt<br><i>Salmonella enterica</i><br>4824399 nt                 | 192<br>197<br>200<br>202<br>204 | 2770.250-2774.250<br>271 |       | <i>Plesiomonas shigelloides</i><br>44392 nt<br><i>Yersinia enterocolitica</i><br>4761721 nt<br><i>Shigella sonnei</i><br>81822 nt<br><i>Citrobacter rodentium</i><br>5553284 nt<br><i>Y pseudotuberculosis</i><br>4812537 nt              | 141<br>141<br>146<br>147<br>147 |
| 566.750-572.250<br>317 |       | <i>Citrobacter rodentium</i><br>5553284 nt<br><i>Shigella sonnei</i><br>81822 nt<br><i>Y pseudotuberculosis</i><br>4812537 nt<br><i>Plesiomonas shigelloides</i><br>44392 nt<br><i>Bacillus firmus</i><br>39947 nt           | 109<br>112<br>127<br>138<br>142 | 2779.250-2786.250<br>365 |       | <i>Shigella sonnei</i><br>81822 nt<br><i>Vibrio fischeri</i><br>96774 nt<br><i>Citrobacter rodentium</i><br>5553284 nt<br><i>Proteus mirabilis</i><br>4199909 nt<br><i>Shewanella hanedai</i><br>7090 nt                                  | 116<br>126<br>127<br>127<br>132 |
| 575.750-585.750<br>287 |       | <i>Citrobacter rodentium</i><br>5553284 nt<br><i>Shigella sonnei</i><br>81822 nt<br><i>Escherichia coli</i> pR721<br>76758 nt<br><i>Y pseudotuberculosis</i><br>4812537 nt<br><i>Plesiomonas shigelloides</i><br>44392 nt    | 107<br>110<br>111<br>119<br>129 | 2789.250-2790.250<br>392 |       | <i>P chrysanthemi</i><br>68378 nt<br><br>no credible donor                                                                                                                                                                                | 273                             |
| 620.750-622.250<br>293 |   | <i>P chrysanthemi</i><br>68378 nt<br><i>Serratia marcescens</i><br>5199066 nt                                                                                                                                                | 229<br>236                      | 2878.750-2883.750<br>241 |   | <i>Salmonella typhi</i> pR27<br>38875 nt<br><i>Y enterocolitica</i> pYVe22<br>70761 nt<br><i>Y enterocolitica</i> pYVe8081<br>68784 nt<br><i>Yersinia pestis</i> pCD1<br>71656 nt<br><i>Yersinia pestis</i> pl_2<br>71601 nt              | 138<br>141<br>142<br>143<br>143 |
| 635.750-636.750<br>434 |   | <i>Wolbachia pipientis</i><br>7564 nt<br>no credible donor                                                                                                                                                                   | 247                             | 2899.750-2903.750<br>240 |   | <i>Yersinia enterocolitica</i><br>4761721 nt<br><i>Yersinia ruckeri</i><br>11491 nt<br><i>Y pseudotuberculosis</i><br>4812537 nt<br><i>Salmonella enterica</i><br>4824399 nt<br><i>Photobacterium luminescens</i><br>214210 nt            | 163<br>164<br>170<br>172<br>173 |
| 676.250-677.750<br>211 |   | <i>Salmonella enterica</i><br>4824399 nt<br><i>Shigella dysenteriae</i><br>61982 nt<br><i>Salmonella enteritidis</i><br>42949 nt<br><i>Citrobacter freundii</i><br>58393 nt<br><i>Escherichia coli</i> O157-H7<br>5577072 nt | 205<br>206<br>207<br>207<br>208 | 2983.250-2995.750<br>390 |   | <i>Shigella sonnei</i><br>81822 nt<br><i>Vibrio fischeri</i><br>96774 nt<br><i>Proteus mirabilis</i><br>4199909 nt<br><i>Staphylococcus carnosus</i><br>53178 nt<br><i>Xenorhabdus luminescens</i><br>7954 nt                             | 115<br>115<br>124<br>127<br>128 |
| 728.750-738.250<br>189 |   | <i>Salmonella enterica</i> pvir<br>50334 nt<br><i>S typhimurium</i> pSLT<br>95224 nt<br>Bacteriophage P4<br>11854 nt<br>Bacteriophage lambda<br>49349 nt<br><i>Escherichia coli</i> pO157<br>94136 nt                        | 133<br>135<br>142<br>144<br>145 | 3184.250-3190.750<br>245 |   | <i>Y pseudotuberculosis</i><br>4812537 nt<br><i>Yersinia enterocolitica</i><br>4761721 nt<br><i>Photobacterium luminescens</i><br>214210 nt<br><i>Y enterocolitica</i> pYVe8081<br>68784 nt<br><i>Y enterocolitica</i> pYVe22<br>70761 nt | 102<br>111<br>113<br>122<br>124 |
| 872.750-874.750<br>309 |   | <i>Xenorhabdus nematophilus</i><br>136208 nt<br><i>Yersinia enterocolitica</i><br>4761721 nt<br><i>Photobacterium luminescens</i><br>214210 nt                                                                               | 221<br>230<br>234               | 3262.250-3267.750<br>341 |   | <i>A actinomycetemcomitans</i><br>283385 nt<br><i>Coxiella burnetii</i><br>77823 nt<br><i>Coxiella burnetii</i> pQpRS<br>37943 nt<br><i>Coxiella burnetii</i> pQpDV<br>39907 nt<br><i>Citrobacter rodentium</i><br>5553284 nt             | 133<br>144<br>145<br>146<br>146 |
| 976.250-977.750<br>348 |   | <i>Klebsiella aerogenes</i><br>32774 nt<br>no credible donor                                                                                                                                                                 | 296                             | 3286.750-3287.250<br>379 |   | <i>Erwinia carotovora</i><br>91889 nt<br>no credible donor                                                                                                                                                                                | 368                             |

|                          |                                                                                                                                                                            |                                                                                                                                                                                                                                     |                                 |                          |                                                                                                                                                                             |                                                                                                                                                                                                                                |                                 |
|--------------------------|----------------------------------------------------------------------------------------------------------------------------------------------------------------------------|-------------------------------------------------------------------------------------------------------------------------------------------------------------------------------------------------------------------------------------|---------------------------------|--------------------------|-----------------------------------------------------------------------------------------------------------------------------------------------------------------------------|--------------------------------------------------------------------------------------------------------------------------------------------------------------------------------------------------------------------------------|---------------------------------|
| 998.750-999.250<br>325   | 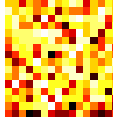<br>     | <i>Yersinia ruckeri</i><br>11491 nt<br>no credible donor                                                                                                                                                                            | 299                             | 3359.750-3361.250<br>275 | <br>     | <i>Shigella boydii</i><br>65724 nt<br><i>Salmonella typhi</i> pR27<br>38875 nt<br><i>Yersinia pestis</i> pCD1<br>71656 nt<br><i>Yersinia pestis</i> pl_2<br>71601 nt<br><i>Escherichia coli</i> pR721<br>76758 nt              | 202<br>207<br>214<br>214<br>216 |
| 1065.250-1065.750<br>339 | <br>     | <i>Escherichia coli</i> MG1655<br>4716202 nt<br>no credible donor                                                                                                                                                                   | 339                             | 3447.250-3448.750<br>254 | <br>     | <i>Vibrio proteolyticus</i><br>13955 nt<br><i>Salmonella enterica</i> pHCM2<br>107965 nt                                                                                                                                       | 220<br>237                      |
| 1089.250-1095.250<br>198 | <br>     | <i>Yersinia enterocolitica</i><br>4761721 nt<br><i>Shigella boydii</i><br>65724 nt<br><i>Xenorhabdus nematophilus</i><br>136208 nt<br><i>Y enterocolitica</i> pYVe22<br>70761 nt<br><i>Photorhabdus luminescens</i><br>5770353 nt   | 114<br>114<br>124<br>125<br>127 | 3468.750-3470.250<br>323 | <br>     | <i>Pelobacter acidigallici</i><br>4213 nt<br>no credible donor                                                                                                                                                                 | 278                             |
| 1101.750-1104.750<br>308 | <br>     | <i>Citrobacter rodentium</i><br>5553284 nt<br><i>Proteus vulgaris</i><br>12696 nt<br><i>Escherichia coli</i> pR721<br>76758 nt<br><i>Y pseudotuberculosis</i><br>4812537 nt<br><i>Shigella sonnei</i><br>81822 nt                   | 151<br>160<br>164<br>169<br>169 | 3578.250-3582.250<br>342 | <br>     | <i>Shigella sonnei</i><br>81822 nt<br><i>Citrobacter rodentium</i><br>5553284 nt<br><i>Proteus mirabilis</i><br>4199909 nt<br><i>Y pseudotuberculosis</i><br>4812537 nt<br><i>Bombyx mori</i><br>513541 nt                     | 123<br>129<br>145<br>146<br>155 |
| 1194.750-1201.250<br>298 | <br>     | <i>Citrobacter rodentium</i><br>5553284 nt<br><i>Escherichia coli</i> pR721<br>76758 nt<br><i>Salmonella typhi</i> pR27<br>38875 nt<br><i>Shigella sonnei</i><br>81822 nt<br><i>Y enterocolitica</i> pYVe8081<br>68784 nt           | 119<br>127<br>134<br>135<br>137 | 3614.250-3620.750<br>263 | <br>     | <i>Pantoea agglomerans</i><br>33912 nt<br><i>P chrysanthemi</i><br>68378 nt<br><i>Morganella morganii</i><br>20046 nt<br><i>Erwinia chrysanthemi</i><br>202829 nt<br><i>Klebsiella aerogenes</i><br>32774 nt                   | 178<br>189<br>196<br>198<br>203 |
| 1208.250-1221.750<br>291 | <br> | <i>Citrobacter rodentium</i><br>5553284 nt<br><i>Shigella sonnei</i><br>81822 nt<br><i>Y pseudotuberculosis</i><br>4812537 nt<br><i>Yersinia enterocolitica</i><br>4761721 nt<br><i>Plesiomonas shigelloides</i><br>44392 nt        | 92<br>97<br>97<br>120<br>120    | 3628.750-3633.250<br>391 | <br> | <i>Proteus mirabilis</i><br>4199909 nt<br><i>Shigella sonnei</i><br>81822 nt<br><i>Citrobacter rodentium</i><br>5553284 nt<br><i>Shewanella hanedai</i><br>7090 nt<br><i>Vibrio fischeri</i><br>96774 nt                       | 149<br>157<br>165<br>168<br>168 |
| 1227.250-1228.250<br>220 | <br> | <i>Escherichia coli</i> MG1655<br>4716202 nt<br><i>E coli</i> O157-H7 EDL9333<br>5577072 nt<br><i>E coli</i> O157-H7 0509952<br>5577057 nt<br><i>Salmonella</i> Typhi<br>4889287 nt<br><i>Salmonella dublin</i><br>38857 nt         | 220<br>222<br>222<br>232<br>233 | 3648.750-3655.750<br>265 | <br> | <i>Y pseudotuberculosis</i><br>4812537 nt<br><i>Yersinia enterocolitica</i><br>4761721 nt<br><i>Citrobacter rodentium</i><br>5553284 nt<br><i>Photorhabdus luminescens</i><br>5770353 nt<br><i>Shigella sonnei</i><br>81822 nt | 100<br>103<br>114<br>115<br>119 |
| 1411.750-1418.250<br>192 | <br> | <i>Salmonella enterica</i> pHCM1<br>221004 nt<br><i>Salmonella typhi</i> pHCM1<br>221888 nt<br><i>Shigella boydii</i><br>65724 nt<br><i>Bacteriophage H-19B</i><br>17387 nt<br><i>Escherichia coli</i> pB1171<br>69899 nt           | 120<br>120<br>122<br>122<br>125 | 3663.250-3664.750<br>186 | <br> | <i>E coli</i> O157-H7 EDL9333<br>5577072 nt<br><i>E coli</i> O157-H7 0509952<br>5577057 nt<br><i>Escherichia coli</i> MG1655<br>4716202 nt<br><i>Salmonella dublin</i><br>38857 nt<br><i>Citrobacter freundii</i><br>58393 nt  | 185<br>185<br>186<br>194<br>196 |
| 1421.750-1424.250<br>321 | <br> | <i>Citrobacter rodentium</i><br>5553284 nt<br><i>Y pseudotuberculosis</i><br>4812537 nt<br><i>Y enterocolitica</i> pYVe8081<br>68784 nt<br><i>Shigella sonnei</i><br>81822 nt<br><i>Y enterocolitica</i> pYVe22<br>70761 nt         | 166<br>171<br>177<br>180<br>181 | 3759.250-3768.250<br>192 | <br> | <i>Escherichia coli</i> pO157<br>94136 nt<br><i>Shigella flexneri</i><br>4673098 nt<br><i>Bacteriophage P4</i><br>11854 nt<br><i>Bacteriophage lambda</i><br>49349 nt<br><i>Erwinia amylovora</i> pEA29<br>28683 nt            | 142<br>146<br>148<br>149<br>153 |
| 1430.750-1434.250<br>287 | <br> | <i>Escherichia coli</i> pR721<br>76758 nt<br><i>Xenorhabdus nematophilus</i><br>136208 nt<br><i>Citrobacter rodentium</i><br>5553284 nt<br><i>Bacteriophage Ij1</i><br>8641 nt<br><i>Shigella sonnei</i><br>81822 nt                | 132<br>157<br>157<br>158<br>159 | 3792.250-3804.750<br>363 | <br> | <i>Shigella sonnei</i><br>81822 nt<br><i>Proteus mirabilis</i><br>4199909 nt<br><i>A actinomycetemcomitans</i><br>283385 nt<br><i>Citrobacter rodentium</i><br>5553284 nt<br><i>S aureus</i> pJ3356<br>8215 nt                 | 118<br>120<br>130<br>138<br>140 |
| 1474.250-1475.750<br>262 | <br> | <i>Xenorhabdus nematophilus</i><br>136208 nt<br><i>Photorhabdus luminescens</i><br>5770353 nt<br><i>Yersinia pestis</i> pCD1<br>71656 nt<br><i>Y enterocolitica</i> pYVe8081<br>68784 nt<br><i>Yersinia pestis</i> pl_2<br>71601 nt | 204<br>204<br>207<br>207<br>208 | 3835.250-3835.750<br>335 | <br> | <i>Bacteriophage HK620</i><br>38918 nt<br>no credible donor                                                                                                                                                                    | 318                             |

|                   |  |  |                                                                                                                                                                                                                                        |                                 |                   |  |  |                                                                                                                                                                                                                                          |                                 |
|-------------------|--|--|----------------------------------------------------------------------------------------------------------------------------------------------------------------------------------------------------------------------------------------|---------------------------------|-------------------|--|--|------------------------------------------------------------------------------------------------------------------------------------------------------------------------------------------------------------------------------------------|---------------------------------|
| 1525.750-1531.250 |  |  | <i>Shigella flexneri</i> pvir<br>216642 nt<br><i>Shigella flexneri</i> pCP301<br>224888 nt<br><i>Shigella boydii</i><br>65724 nt<br><i>Escherichia coli</i> pB171<br>69899 nt<br><i>Escherichia coli</i> pO157<br>94136 nt             | 117<br>118<br>121<br>121<br>132 | 4041.750-4042.250 |  |  | <i>Lactobacillus plantarum</i><br>102499 nt<br>no credible donor                                                                                                                                                                         | 301                             |
| 1541.750-1544.750 |  |  | <i>Proteus mirabilis</i><br>4199909 nt<br><i>Shewanella hanedai</i><br>7090 nt<br><i>Shigella sonnei</i><br>81822 nt<br><i>Manduca sexta</i><br>52825 nt<br><i>Vibrio fischeri</i><br>96774 nt                                         | 168<br>191<br>192<br>193<br>193 | 4059.250-4061.250 |  |  | <i>Bacteriophage APSE-1</i><br>37119 nt<br><i>Yersinia enterocolitica</i><br>4761721 nt<br><i>Photorhabdus luminescens</i><br>5770353 nt<br><i>Y pseudotuberculosis</i><br>4812537 nt<br><i>Yersinia ruckeri</i><br>11491 nt             | 193<br>193<br>195<br>199<br>201 |
| 1574.750-1588.750 |  |  | <i>Yersinia enterocolitica</i><br>4761721 nt<br><i>Y enterocolitica</i> pYVe22<br>70761 nt<br><i>Photorhabdus luminescens</i><br>5770353 nt<br><i>Y enterocolitica</i> pYVe8081<br>68784 nt<br><i>Yersinia pestis</i> pCD1<br>71656 nt | 100<br>103<br>103<br>104<br>108 | 4178.250-4185.750 |  |  | <i>S enterica</i> pHCM2<br>107965 nt<br><i>Salmonella typhi</i> pHCM2<br>108384 nt<br><i>Yersinia pestis</i> pMT1<br>102516 nt<br><i>Vibrio proteolyticus</i><br>13955 nt<br><i>Salmonella enteritidis</i><br>42949 nt                   | 207<br>207<br>214<br>226<br>228 |
| 1593.750-1594.750 |  |  | <i>Erwinia pyrifoliae</i><br>9435 nt<br>no credible donor                                                                                                                                                                              | 241                             | 4218.250-4219.250 |  |  | <i>Shigella sonnei</i><br>81822 nt<br><i>Citrobacter rodentium</i><br>5553284 nt                                                                                                                                                         | 230<br>238                      |
| 1629.250-1641.250 |  |  | <i>Escherichia coli</i> pR721<br>76758 nt<br><i>Salmonella typhi</i> pR27<br>38875 nt<br><i>Xenorhabdus nematophilus</i><br>136208 nt<br><i>Shigella boydii</i><br>65724 nt<br><i>Bacteriophage If1</i><br>8641 nt                     | 90<br>112<br>116<br>117<br>118  | 4312.750-4321.250 |  |  | <i>Klebsiella aerogenes</i><br>32774 nt<br><i>P chrysanthemii</i><br>68378 nt<br><i>Serratia marcescens</i><br>5199066 nt<br><i>Xanthomonas campestris</i><br>191612 nt<br><i>Xanthomonas oryzae</i><br>183753 nt                        | 126<br>147<br>164<br>177<br>178 |
| 1644.250-1646.750 |  |  | <i>Escherichia coli</i> pR721<br>76758 nt<br><i>Y enterocolitica</i> pYVe8081<br>68784 nt<br><i>Salmonella typhi</i> pR27<br>38875 nt<br><i>Y enterocolitica</i> pYVe22<br>70761 nt<br><i>Bacillus subtilis</i><br>4275077 nt          | 147<br>164<br>164<br>169<br>169 | 4356.250-4358.250 |  |  | <i>Photorhabdus luminescens</i><br>5770353 nt<br><i>Y pseudotuberculosis</i><br>4812537 nt<br><i>Yersinia enterocolitica</i><br>4761721 nt<br><i>Xenorhabdus nematophilus</i><br>136208 nt<br><i>Yersinia ruckeri</i><br>11491 nt        | 188<br>192<br>192<br>199<br>201 |
| 1770.250-1770.750 |  |  | <i>Bacteroides fragilis</i><br>278172 nt<br>no credible donor                                                                                                                                                                          | 296                             | 4471.250-4476.250 |  |  | <i>Yersinia enterocolitica</i><br>4761721 nt<br><i>Citrobacter rodentium</i><br>5553284 nt<br><i>Y pseudotuberculosis</i><br>4812537 nt<br><i>Salmonella typhi</i> pR27<br>38875 nt<br><i>Y enterocolitica</i> pYVe8081<br>68784 nt      | 149<br>154<br>155<br>156<br>159 |
| 1800.250-1803.750 |  |  | <i>Y pseudotuberculosis</i><br>4812537 nt<br><i>Escherichia coli</i> pR721<br>76758 nt<br><i>Plesiomonas shigelloides</i><br>44392 nt<br><i>Citrobacter rodentium</i><br>5553284 nt<br><i>Yersinia enterocolitica</i><br>4761721 nt    | 160<br>161<br>166<br>166<br>169 | 4498.750-4505.250 |  |  | <i>Escherichia coli</i> pR721<br>76758 nt<br><i>Y enterocolitica</i> pYVe8081<br>68784 nt<br><i>Y enterocolitica</i> pYVe22<br>70761 nt<br><i>Yersinia pestis</i> pl_2<br>71601 nt<br><i>Shigella flexneri</i> pvir<br>216642 nt         | 109<br>116<br>116<br>121<br>121 |
| 1853.250-1854.750 |  |  | <i>Salmonella enteritidis</i><br>42949 nt<br><i>Salmonella enterica</i><br>4824399 nt<br><i>E coli</i> O157-H7 EDL9333<br>5577072 nt<br><i>Citrobacter freundii</i><br>58393 nt<br><i>Erwinia carotovora</i><br>91889 nt               | 182<br>189<br>196<br>197<br>198 | 4510.750-4511.750 |  |  | <i>Pseudomonas syringae</i><br>332129 nt<br>no credible donor                                                                                                                                                                            | 261                             |
| 1868.750-1870.750 |  |  | <i>Yersinia enterocolitica</i><br>4761721 nt<br><i>Shigella boydii</i><br>65724 nt<br><i>Y enterocolitica</i> pYVe22<br>70761 nt<br><i>Plesiomonas shigelloides</i><br>44392 nt<br><i>Yersinia pestis</i> pCD1<br>71656 nt             | 164<br>172<br>178<br>180<br>181 | 4532.750-4541.750 |  |  | <i>Y pseudotuberculosis</i><br>4812537 nt<br><i>Yersinia enterocolitica</i><br>4761721 nt<br><i>Photorhabdus luminescens</i><br>5770353 nt<br><i>Citrobacter rodentium</i><br>5553284 nt<br><i>Xenorhabdus nematophilus</i><br>136208 nt | 104<br>113<br>116<br>117<br>118 |
| 2033.250-2035.750 |  |  | <i>Yersinia enterocolitica</i><br>4761721 nt<br><i>Y enterocolitica</i> pYVe22<br>70761 nt<br><i>Y enterocolitica</i> pYVe8081<br>68784 nt<br><i>Yersinia pestis</i> pCD1<br>71656 nt<br><i>Yersinia pestis</i> pl_2<br>71601 nt       | 146<br>157<br>159<br>160<br>160 | 4573.750-4577.250 |  |  | <i>Y pseudotuberculosis</i><br>4812537 nt<br><i>Citrobacter rodentium</i><br>5553284 nt<br><i>Yersinia enterocolitica</i><br>4761721 nt<br><i>Shigella sonnei</i><br>81822 nt<br><i>Xenorhabdus nematophilus</i><br>136208 nt            | 120<br>131<br>133<br>134<br>135 |
