# Supplementary material
Source: PubMed Central journal article supplement (PMC546175)
Supplement: nar_33_1_e6__7.pdf [file nar_33_1_e6__7.pdf]

**Annex 7:** Gene-based comparison of horizontal transfers detected by Garcia-Vallve *et al.* [16], Hayes and Borodovsky [35], Lawrence and Ochman [34], Nakamura et al [14], Medigue et al [49] and this work (TW, threshold 99 %, 97.5 %, 95 %) for *E. coli*. Columns are self-explanatory. A star indicates a detected gene. Yellow indicates genes detected by our approach and at least another method, green indicates genes detected only by our approach, red indicates genes found by all methods except our approach, NF = no feature in GIB database.

| <i>E. coli</i> |        | Ref    | Ref | Ref | Ref | Ref | TW | TW | TW   |    |
|----------------|--------|--------|-----|-----|-----|-----|----|----|------|----|
| begin          | end    | Gene   | 16  | 35  | 34  | 14  | 49 | 99 | 97.5 | 95 |
| 5234           | 5531   | booo5  |     |     | *   | *   |    |    |      |    |
| 10725          | 11315  | htgA   |     |     |     | *   |    |    |      |    |
| 15445          | 16557  | yi811  |     | *   | *   | *   |    |    |      |    |
| 15869          | 16177  | yi82_1 |     |     |     | *   |    |    |      |    |
| 16751          | 16960  | gef    |     |     |     | *   |    |    |      |    |
| 16952          | 17006  | gefL   |     |     |     |     | *  |    |      |    |
| 18715          | 19620  | nhaR   |     | *   |     |     |    |    |      |    |
| 19811          | 20315  | IS1B1  |     |     | *   |     |    |    |      |    |
| 20233          | 20509  | IS1A1  |     |     | *   |     |    |    |      |    |
| 34195          | 34695  | caiF   | *   |     |     | *   | *  |    |      |    |
| 58474          | 59125  | yabP   |     |     | *   | *   |    |    |      |    |
| 59121          | 59280  | yabQ   |     |     | *   | *   | *  |    |      |    |
| 65855          | 66550  | b0061  |     |     |     |     |    |    |      | *  |
| 66835          | 68337  | b0062  |     |     |     |     |    |    |      | *  |
| 70387          | 71265  | b0064  |     |     |     |     |    |    |      | *  |
| 71351          | 72115  | b0065  |     |     |     |     |    |    |      | *  |
| 72229          | 72927  | b0066  |     |     |     |     | *  | *  | *    | *  |
| 72911          | 74521  | b0067  |     |     |     |     | *  | *  | *    | *  |
| 74497          | 75480  | b0068  |     |     |     |     | *  | *  | *    | *  |
| 75644          | 77299  | b0069  |     |     |     |     |    |    |      | *  |
| 77621          | 78800  | yabM   |     | *   | *   |     |    |    |      |    |
| 84191          | 85312  | leuO   |     | *   |     | *   |    |    |      |    |
| 111564         | 111698 | b0100  |     |     |     | *   |    |    |      |    |
| 115714         | 117099 | hofB   |     | *   |     |     |    |    |      |    |
| 123017         | 125680 | b0114  |     |     |     |     | *  | *  | *    | *  |
| 125695         | 127587 | b0115  |     |     |     |     | *  | *  | *    | *  |
| 127912         | 129336 | b0116  |     |     |     |     | *  | *  | *    | *  |
| 129407         | 131260 | yacH   | *   |     |     | *   |    |    |      | *  |
| 135598         | 136464 | speE   |     | *   |     |     |    |    |      |    |
| 136570         | 137040 | yacC   |     |     |     | *   |    |    |      |    |
| 145081         | 146310 | yadE   |     | *   |     |     |    |    |      |    |
| 146968         | 147870 | yadD   |     | *   | *   | *   |    |    |      |    |
| 148807         | 149601 | b0134  |     |     |     |     |    |    |      | *  |
| 149715         | 150953 | yadC   | *   | *   | *   | *   | *  | *  | *    | *  |
| 151003         | 151599 | yadK   | *   |     | *   | *   | *  | *  | *    | *  |
| 151626         | 152231 | yadL   | *   |     | *   | *   | *  | *  | *    | *  |
| 152243         | 152854 | yadM   | *   |     | *   | *   | *  | *  | *    | *  |
| 152829         | 155426 | htrE   | *   | *   | *   |     | *  | *  | *    | *  |
| 155461         | 156201 | ecpD   | *   | *   | *   | *   | *  | *  | *    | *  |
| 156299         | 156883 | yadN   | *   |     | *   | *   | *  | *  | *    | *  |
| 159186         | 160112 | yadB   |     | *   |     |     |    |    |      |    |

| <i>E coli</i> |        | Gene  | Ref | Ref | Ref | Ref | Ref | TW | TW   | TW |
|---------------|--------|-------|-----|-----|-----|-----|-----|----|------|----|
| begin         | end    |       | 16  | 35  | 34  | 14  | 49  | 99 | 97.5 | 95 |
| 160782        | 161486 | sfs1  |     | *   |     | *   |     |    |      |    |
| 169778        | 170575 | b0151 |     |     |     |     |     | *  | *    |    |
| 170575        | 171465 | b0152 |     |     |     |     |     | *  | *    |    |
| 171462        | 173444 | b0153 |     |     |     |     |     | *  | *    |    |
| 173602        | 174882 | b0154 |     |     |     |     |     | *  | *    |    |
| 175107        | 176528 | b0155 |     |     |     |     |     | *  | *    |    |
| 177662        | 178462 | yadT  |     | *   |     |     |     |    |      |    |
| 179237        | 180754 | dgt   |     | *   |     |     |     |    |      |    |
| 184257        | 185000 | yaeI  |     | *   | *   |     |     |    |      |    |
| 184987        | 185119 | b0165 |     |     | *   | *   |     |    |      |    |
| 190857        | 191708 | tsf   |     | *   |     |     |     |    |      |    |
| 194903        | 195664 | yaeS  |     | *   |     |     |     |    |      |    |
| 215269        | 215979 | cutF  |     | *   |     |     |     |    |      |    |
| 216179        | 217057 | yaeF  |     |     |     | *   |     |    |      |    |
| 229167        | 229970 | yafB  |     | *   |     |     |     |    |      |    |
| 229967        | 230881 | yafc  |     | *   |     |     |     |    |      |    |
| 231122        | 231922 | yafD  |     | *   |     |     |     |    |      |    |
| 231926        | 232550 | yafE  |     |     | *   |     |     |    |      |    |
| 234027        | 234782 | gloB  |     | *   |     | *   |     |    |      |    |
| 234798        | 235538 | yafS  |     | *   |     |     | *   | *  | *    |    |
| 236067        | 236798 | dnaQ  |     | *   |     |     | *   | *  | *    |    |
| 237335        | 238120 | yafT  |     | *   | *   | *   | *   | *  | *    |    |
| 238746        | 239084 | yafU  | *   |     | *   | *   | *   | *  | *    |    |
| 239419        | 240189 | b0219 |     |     |     |     |     |    |      | *  |
| 245065        | 245805 | yafK  |     | *   |     |     |     |    |      |    |
| 245961        | 246240 | yafQ  |     |     | *   | *   | *   |    |      |    |
| 246242        | 246503 | dinJ  |     |     | *   |     |     |    |      |    |
| 246712        | 247462 | yafL  |     | *   | *   | *   |     |    |      |    |
| 247637        | 248135 | yafM  |     |     | *   | *   | *   |    |      |    |
| 248358        | 250098 | fhiA  |     |     | *   |     |     |    |      |    |
| 250042        | 250828 | mbhA  |     |     | *   |     |     |    |      |    |
| 252005        | 252299 | yafN  |     |     | *   | *   | *   |    |      |    |
| 252301        | 252700 | yafO  | *   |     | *   | *   | *   |    |      |    |
| 252709        | 253162 | yafP  | *   |     | *   | *   | *   |    |      |    |
| 258269        | 259324 | phoE  |     | *   |     |     |     |    |      |    |
| 262552        | 262894 | b0245 |     |     | *   |     |     |    |      |    |
| 262914        | 263232 | yafW  |     |     | *   | *   |     |    |      |    |
| 263972        | 264431 | b0248 |     | *   |     |     | *   | *  | *    |    |
| 264528        | 264768 | b0249 |     | *   |     |     | *   | *  | *    |    |
| 264844        | 265312 | b0250 |     | *   |     |     | *   | *  | *    |    |
| 265334        | 266192 | yafY  |     | *   | *   | *   | *   | *  | *    |    |
| 266408        | 267245 | b0252 |     | *   |     |     | *   | *  | *    |    |
| 267321        | 268188 | b0253 |     | *   |     |     |     |    |      | *  |
| 268513        | 269407 | perR  |     | *   | *   | *   |     |    |      |    |
| 269466        | 269871 | y191a |     |     | *   |     |     |    |      |    |
| 269827        | 270979 | IS30A |     | *   | *   | *   |     |    |      |    |
| 271054        | 271480 | b0257 |     |     | *   | *   |     |    |      |    |
| 272086        | 273217 | ykfC  |     | *   | *   | *   |     |    |      |    |
| 273325        | 274342 | IS5A  |     |     | *   |     |     |    |      |    |
| 274525        | 275953 | ykfD  |     | *   |     |     |     |    |      | *  |

| <i>E. coli</i> |        | Gene  | Ref Ref Ref Ref Ref TW TW TW |    |    |    |    |    |      |    |  |
|----------------|--------|-------|------------------------------|----|----|----|----|----|------|----|--|
| begin          | end    |       | 16                           | 35 | 34 | 14 | 49 | 99 | 97.5 | 95 |  |
| 275939         | 276872 | yagD  |                              |    | *  |    |    |    |      | *  |  |
| 276980         | 278039 | yagC  |                              |    | *  |    |    |    |      | *  |  |
| 278038         | 278401 | b0263 |                              |    | *  |    |    |    |      | *  |  |
| 278402         | 278906 | IS1B2 | *                            |    | *  |    |    |    |      | *  |  |
| 278824         | 279100 | IS1A2 |                              |    | *  | *  |    |    | *    | *  |  |
| 279609         | 279987 | yagB  |                              |    | *  | *  |    | *  | *    | *  |  |
| 280053         | 281208 | yagA  | *                            |    | *  |    |    | *  | *    | *  |  |
| 281481         | 282411 | yagE  | *                            |    | *  |    |    | *  | *    | *  |  |
| 282425         | 284393 | yagF  | *                            |    | *  |    |    | *  | *    | *  |  |
| 284619         | 286002 | b0270 |                              |    | *  |    |    | *  | *    | *  |  |
| 286013         | 287624 | yagH  | *                            |    | *  |    |    | *  | *    | *  |  |
| 287628         | 288387 | yagI  | *                            |    | *  |    |    | *  | *    | *  |  |
| 288525         | 289530 | argF  | *                            |    | *  |    |    | *  | *    | *  |  |
| 289873         | 290377 | IS1B3 | *                            |    | *  |    |    | *  | *    | *  |  |
| 290295         | 290571 | IS1A3 |                              |    | *  | *  |    | *  | *    | *  |  |
| 290724         | 291456 | yagJ  |                              | *  | *  |    |    | *  | *    | *  |  |
| 291546         | 292173 | yagK  | *                            |    | *  | *  | *  | *  | *    | *  |  |
| 292444         | 293143 | yagL  | *                            |    | *  | *  | *  | *  | *    | *  |  |
| 293169         | 294023 | yagM  | *                            | *  |    | *  | *  | *  | *    | *  |  |
| 294363         | 294803 | yagN  | *                            |    |    | *  | *  | *  | *    | *  |  |
| 294920         | 296320 | intF  | *                            | *  |    | *  | *  | *  | *    | *  |  |
| 296605         | 297016 | yagP  |                              |    | *  | *  |    |    |      |    |  |
| 302215         | 302829 | yagU  | *                            |    | *  | *  | *  |    |      |    |  |
| 303077         | 303406 | ykgJ  |                              |    |    | *  | *  |    |      |    |  |
| 309970         | 310560 | ykgK  |                              |    |    | *  | *  | *  | *    | *  |  |
| 311336         | 311563 | ykgL  |                              |    |    | *  | *  | *  | *    | *  |  |
| 311738         | 312001 | ykgM  |                              |    |    | *  |    | *  | *    | *  |  |
| 313581         | 314468 | eaeH  | *                            | *  | *  |    |    | *  | *    | *  |  |
| 314811         | 315677 | tra5  |                              | *  |    | *  |    | *  | *    | *  |  |
| 315674         | 316393 | ykgA  | *                            | *  | *  | *  | *  |    | *    | *  |  |
| 316950         | 317552 | ykgB  | *                            |    | *  |    |    | *  | *    | *  |  |
| 317526         | 317795 | b0302 | *                            |    | *  | *  |    | *  | *    | *  |  |
| 317555         | 317806 | ykgI  | *                            | *  | *  | *  | *  | *  | *    | *  |  |
| 317900         | 319252 | ykgC  | *                            | *  | *  |    | *  | *  | *    | *  |  |
| 319451         | 320305 | ykgD  |                              | *  |    | *  |    | *  | *    | *  |  |
| 320832         | 321551 | ykgE  |                              | *  | *  |    |    | *  | *    | *  |  |
| 321562         | 322989 | ykgF  |                              | *  | *  |    |    | *  | *    | *  |  |
| 322829         | 323678 | b0308 |                              |    | *  |    |    |    |      |    |  |
| 323632         | 323845 | b0309 |                              |    | *  | *  |    |    |      |    |  |
| 323920         | 324588 | ykgH  |                              |    |    | *  | *  |    |      |    |  |
| 326485         | 327957 | b0312 |                              |    |    |    |    | *  | *    |    |  |
| 327971         | 328558 | b0313 |                              |    |    |    |    | *  | *    |    |  |
| 323920         | 324589 | ykgH  | *                            |    | *  |    |    |    |      |    |  |
| 331595         | 332684 | yahA  |                              | *  | *  |    |    | *  | *    |    |  |
| 332725         | 333658 | b0316 |                              |    | *  |    |    | *  | *    |    |  |
| 333749         | 334247 | b0317 |                              |    | *  |    |    | *  | *    |    |  |
| 334504         | 335110 | yahD  | *                            |    | *  |    |    |    |      |    |  |
| 335149         | 336013 | yahE  |                              | *  | *  | *  |    |    |      |    |  |
| 336002         | 337550 | b0320 |                              |    | *  |    |    | *  | *    | *  |  |
| 337549         | 338968 | b0321 |                              |    | *  |    |    | *  | *    | *  |  |

| <i>E. coli</i> |        | Gene  | Ref | Ref | Ref | Ref | Ref | TW | TW   | TW |
|----------------|--------|-------|-----|-----|-----|-----|-----|----|------|----|
| begin          | end    |       | 16  | 35  | 34  | 14  | 49  | 99 | 97.5 | 95 |
| 338993         | 339314 | yahH  |     | *   | *   |     |     | *  | *    | *  |
| 339389         | 340340 | b0323 |     | *   |     |     |     | *  | *    | *  |
| 340349         | 341732 | b0324 |     | *   |     |     |     | *  | *    | *  |
| 342108         | 343158 | b0325 |     | *   |     |     |     |    |      | *  |
| 343400         | 344216 | yahL  | *   | *   | *   | *   |     |    |      | *  |
| 344598         | 344874 | yahM  |     | *   | *   | *   |     |    |      | *  |
| 344890         | 345562 | b0328 |     | *   |     |     |     |    |      |    |
| 345708         | 345984 | yahO  |     | *   |     |     | *   |    |      |    |
| 348742         | 349189 | b0332 |     | *   | *   |     |     |    |      |    |
| 349236         | 350405 | b0333 |     |     |     |     | *   | *  | *    |    |
| 350439         | 351890 | b0334 |     |     |     |     | *   | *  | *    |    |
| 351930         | 353816 | b0335 |     |     |     |     | *   | *  | *    |    |
| 357015         | 357915 | cynR  |     | *   | *   |     |     |    |      |    |
| 358023         | 358683 | cynT  |     |     | *   |     |     |    |      |    |
| 358713         | 359184 | cynS  |     |     | *   |     |     |    |      |    |
| 359216         | 360371 | cynX  |     |     | *   |     |     |    |      |    |
| 360473         | 361085 | lacA  |     |     | *   | *   | *   |    |      |    |
| 361150         | 362404 | lacY  |     |     | *   |     |     |    |      |    |
| 362455         | 365530 | lacZ  |     |     | *   |     |     |    |      |    |
| 365652         | 366735 | lacI  |     |     | *   |     |     |    |      |    |
| 370400         | 371329 | mhpC  | *   |     |     |     |     |    |      | *  |
| 371333         | 372148 | b0350 |     |     |     |     |     | *  | *    |    |
| 372145         | 373095 | b0351 |     |     |     |     |     | *  | *    |    |
| 373092         | 374105 | b0352 |     |     |     |     |     | *  | *    |    |
| 376759         | 377592 | yaiM  |     | *   |     |     |     |    |      |    |
| 378830         | 379126 | yaiN  |     |     |     | *   |     |    |      |    |
| 379293         | 380066 | yaiO  |     | *   | *   |     |     |    |      |    |
| 380068         | 380511 | b0359 | *   |     | *   | *   |     |    |      |    |
| 380530         | 380941 | IS2A  |     |     | *   |     |     |    |      |    |
| 380898         | 381804 | IS2A  |     | *   | *   | *   |     |    |      |    |
| 381728         | 382115 | b0362 |     |     | *   | *   |     |    |      |    |
| 381963         | 383160 | yaiP  |     | *   | *   | *   |     |    |      |    |
| 383283         | 383694 | yaiS  |     |     | *   | *   | *   |    |      |    |
| 389121         | 389391 | b0370 |     |     | *   | *   |     |    |      |    |
| 389475         | 390936 | yaiT  | *   | *   | *   |     | *   | *  | *    |    |
| 390963         | 391830 | IS3   | *   | *   | *   |     | *   | *  | *    |    |
| 391826         | 392135 | IS600 |     | *   |     |     | *   | *  | *    |    |
| 392239         | 393642 | b0374 |     |     |     |     |     |    |      | *  |
| 393685         | 394354 | yaiV  |     |     | *   | *   | *   |    |      |    |
| 398685         | 399029 | b0380 |     |     |     | *   |     |    |      |    |
| 402487         | 402825 | psiF  |     |     |     | *   | *   |    |      |    |
| 406203         | 406395 | yaiA  |     |     | *   | *   | *   |    |      |    |
| 407893         | 408175 | b0392 |     |     | *   |     |     |    |      |    |
| 410255         | 410497 | b0395 |     |     |     | *   |     |    |      |    |
| 410521         | 411705 | araJ  |     | *   |     |     |     |    |      |    |
| 411831         | 414977 | b0397 |     |     |     |     |     |    |      | *  |
| 431536         | 432135 | yajI  |     |     |     | *   |     |    |      |    |
| 453663         | 454013 | bolA  |     |     |     | *   | *   |    |      |    |
| 454357         | 455655 | tig   |     | *   |     |     |     |    |      |    |
| 466624         | 467454 | cof   |     | *   |     |     |     |    |      |    |



| <i>E. coli</i> |        | Gene   | Ref | Ref | Ref | Ref | Ref | TW | TW   | TW |
|----------------|--------|--------|-----|-----|-----|-----|-----|----|------|----|
| begin          | end    |        | 16  | 35  | 34  | 14  | 49  | 99 | 97.5 | 95 |
| 570116         | 570668 | ybcL   | *   |     | *   | *   | *   | *  | *    | *  |
| 570677         | 571475 | ybcM   | *   | *   | *   | *   | *   | *  | *    | *  |
| 571689         | 572145 | ybcN   |     |     | *   | *   |     | *  | *    | *  |
| 572144         | 572315 | ninE   | *   |     | *   | *   | *   | *  | *    | *  |
| 572307         | 572598 | ybcO   |     |     | *   | *   |     | *  | *    | *  |
| 572594         | 572957 | ylcG   |     |     | *   |     | *   | *  | *    | *  |
| 573179         | 573563 | ybcQ   |     |     | *   | *   |     |    |      | *  |
| 573960         | 574977 | IS5B   |     |     | *   |     |     |    |      | *  |
| 574981         | 576109 | nmpC   | *   |     | *   |     | *   | *  | *    | *  |
| 576621         | 576837 | ybcR   | *   |     | *   |     | *   | *  | *    | *  |
| 576836         | 577334 | ybcS   | *   |     | *   | *   | *   | *  | *    | *  |
| 577330         | 577792 | b0556  |     |     | *   |     | *   | *  | *    | *  |
| 577823         | 578117 | ybcU   | *   |     | *   | *   | *   | *  | *    | *  |
| 578407         | 578860 | ybcV   | *   |     | *   | *   | *   | *  | *    | *  |
| 579103         | 579310 | ybcW   | *   |     | *   | *   | *   | *  | *    | *  |
| 580057         | 580603 | nohB   |     |     | *   |     | *   | *  | *    | *  |
| 580577         | 581321 | b0561  |     |     | *   |     | *   | *  | *    | *  |
| 581375         | 581807 | ybcY   | *   |     | *   | *   | *   | *  | *    | *  |
| 582904         | 583654 | appY   | *   |     | *   |     | *   | *  | *    | *  |
| 580577         | 581320 | ybcX   |     | *   |     |     | *   | *  | *    | *  |
| 582904         | 583653 | appY   |     | *   |     | *   | *   | *  | *    | *  |
| 583903         | 584856 | ompT   |     | *   | *   | *   | *   | *  | *    | *  |
| 585370         | 586131 | envY   |     | *   | *   |     | *   | *  | *    | *  |
| 586314         | 587205 | ybcH   |     |     | *   |     |     | *  | *    | *  |
| 587205         | 590178 | nfrA   |     |     | *   |     |     |    |      |    |
| 590164         | 592402 | nfrB   |     |     | *   |     |     |    |      |    |
| 598500         | 600500 | NF     |     |     |     |     |     |    |      |    |
| 607288         | 608401 | IS186B |     | *   | *   | *   |     |    |      |    |
| 608682         | 609311 | entD   |     | *   |     |     |     |    |      |    |
| 612038         | 613162 | fes    |     | *   |     |     |     |    |      |    |
| 613000         | 615500 | NF     |     |     |     |     |     |    |      |    |
| 617477         | 618610 | fepE   |     | *   |     |     |     |    |      |    |
| 619419         | 620411 | fepG   | *   |     |     |     | *   | *  | *    | *  |
| 620408         | 621412 | fepD   | *   |     |     |     | *   | *  | *    | *  |
| 621523         | 622773 | ybdA   | *   |     |     |     | *   | *  | *    | *  |
| 622777         | 623733 | fepB   | *   |     |     |     | *   | *  | *    | *  |
| 624108         | 625283 | entC   | *   |     |     |     |     |    |      | *  |
| 625293         | 626903 | entE   | *   |     |     |     |     |    |      | *  |
| 626917         | 627774 | entB   | *   |     |     |     | *   | *  | *    | *  |
| 627774         | 628520 | entA   | *   |     |     |     | *   | *  | *    | *  |
| 628523         | 628936 | ybdB   | *   |     |     |     | *   | *  | *    | *  |
| 629117         | 631222 | cstA   | *   |     |     |     | *   | *  | *    | *  |
| 634572         | 635792 | ybdN   |     | *   |     | *   |     | *  | *    | *  |
| 635939         | 636841 | ybdO   |     | *   | *   | *   | *   | *  | *    | *  |
| 637050         | 637856 | dsbG   |     | *   |     |     | *   | *  | *    | *  |
| 641311         | 642549 | ybdR   |     | *   |     |     |     |    |      |    |
| 642630         | 643091 | b0609  |     |     |     | *   |     |    |      |    |
| 643420         | 644226 | rnsA   |     | *   |     |     |     |    |      |    |
| 646707         | 647258 | ybdU   | *   |     |     |     |     |    |      |    |
| 656778         | 657161 | crcB   |     |     | *   | *   |     |    |      |    |

| <i>E. coli</i> |        | Gene  | Ref Ref Ref Ref Ref TW TW TW |    |    |    |    |    |      |    |   |  |  |   |
|----------------|--------|-------|------------------------------|----|----|----|----|----|------|----|---|--|--|---|
| begin          | end    |       | 16                           | 35 | 34 | 14 | 49 | 99 | 97.5 | 95 |   |  |  |   |
| 659648         | 660448 | ybeF  |                              | *  |    | *  |    |    |      |    |   |  |  |   |
| 674793         | 675776 | ybeQ  |                              | *  | *  |    | *  |    |      | *  | * |  |  | * |
| 675934         | 676641 | ybeR  |                              | *  | *  | *  |    |    |      | *  | * |  |  | * |
| 676638         | 678065 | ybeS  |                              | *  | *  | *  |    |    |      | *  | * |  |  | * |
| 678075         | 678630 | ybeT  |                              |    | *  | *  | *  |    |      | *  | * |  |  | * |
| 678731         | 679439 | ybeU  |                              | *  | *  | *  | *  |    |      |    |   |  |  | * |
| 679435         | 680887 | ybeV  |                              | *  | *  |    |    |    |      |    |   |  |  |   |
| 680946         | 682617 | b0650 |                              |    | *  |    |    |    |      |    |   |  |  |   |
| 687220         | 688237 | IS5C  |                              |    | *  |    |    |    |      |    |   |  |  |   |
| 695581         | 695916 | b0663 | *                            |    |    |    | *  |    |      |    |   |  |  |   |
| 695931         | 696069 | b0667 |                              |    | *  | *  |    |    |      |    |   |  |  |   |
| 696065         | 696184 | b0669 |                              |    |    | *  |    |    |      |    |   |  |  |   |
| 696185         | 696337 | b0671 |                              |    |    | *  |    |    |      |    |   |  |  |   |
| 699597         | 700817 | nagC  |                              | *  |    |    |    |    |      |    |   |  |  |   |
| 714635         | 715129 | ybfP  | *                            |    | *  | *  | *  |    |      |    |   |  |  |   |
| 715170         | 715532 | ybfG  | *                            |    | *  | *  | *  |    |      |    |   |  |  |   |
| 715611         | 715928 | ybfH  | *                            |    | *  | *  |    |    |      |    |   |  |  |   |
| 715944         | 716141 | ybfI  | *                            |    |    |    |    |    |      |    |   |  |  |   |
| 720279         | 720956 | ybfK  |                              |    |    |    |    | *  |      |    |   |  |  |   |
| 723630         | 724202 | b0696 |                              |    |    |    |    | *  | *    | *  |   |  |  |   |
| 724211         | 726259 | b0697 |                              |    |    |    |    | *  | *    | *  |   |  |  |   |
| 726282         | 727955 | b0698 |                              |    |    |    |    | *  | *    | *  |   |  |  |   |
| 728357         | 728563 | b0699 |                              |    |    |    |    | *  | *    | *  |   |  |  |   |
| 728806         | 733000 | rhsC  |                              |    | *  |    |    | *  | *    | *  |   |  |  | * |
| 732593         | 732815 | b0701 |                              |    | *  | *  |    | *  | *    | *  |   |  |  | * |
| 732999         | 733326 | ybfB  |                              |    | *  | *  | *  | *  | *    | *  |   |  |  | * |
| 733443         | 734877 | rhsA  |                              | *  | *  | *  |    | *  | *    | *  |   |  |  | * |
| 734873         | 735443 | ybfC  | *                            |    | *  | *  | *  | *  | *    | *  |   |  |  | * |
| 736327         | 737185 | ybfL  |                              | *  | *  | *  | *  | *  | *    | *  |   |  |  | * |
| 737315         | 738077 | ybfD  |                              | *  | *  | *  | *  | *  | *    | *  |   |  |  | * |
| 738224         | 738733 | b0707 |                              |    |    |    |    | *  | *    | *  |   |  |  |   |
| 747144         | 748233 | ybgO  |                              | *  | *  |    |    |    |      |    |   |  |  |   |
| 748202         | 748931 | ybgP  |                              | *  | *  |    |    |    |      |    |   |  |  |   |
| 748945         | 751402 | ybgQ  |                              | *  | *  |    |    |    |      |    |   |  |  |   |
| 751452         | 752019 | ybgD  |                              |    | *  | *  |    |    |      |    |   |  |  |   |
| 754400         | 754789 | sdhC  |                              |    |    | *  |    |    |      |    |   |  |  |   |
| 757687         | 757947 | b0725 |                              |    |    | *  |    |    |      |    |   |  |  | * |
| 757929         | 760730 | b0726 |                              |    |    |    |    |    | *    | *  |   |  |  | * |
| 760745         | 761962 | b0727 |                              |    |    |    |    |    | *    | *  |   |  |  | * |
| 762237         | 763403 | b0728 |                              |    |    |    |    |    | *    | *  |   |  |  | * |
| 764376         | 765099 | farR  |                              |    | *  |    |    |    |      |    |   |  |  |   |
| 765207         | 767184 | hrsA  |                              |    | *  |    |    |    |      |    |   |  |  |   |
| 767201         | 769835 | ybgG  |                              | *  | *  |    |    |    |      |    |   |  |  |   |
| 772265         | 773404 | b0734 |                              |    |    |    |    |    |      |    |   |  |  | * |
| 773532         | 773825 | b0735 |                              |    |    |    |    |    |      |    |   |  |  | * |
| 773975         | 774379 | b0736 |                              |    |    |    |    |    |      |    |   |  |  | * |
| 774376         | 775068 | b0737 |                              |    |    |    |    |    |      |    |   |  |  | * |
| 775565         | 776830 | b0739 |                              |    |    |    |    |    |      |    |   |  |  | * |
| 776963         | 778255 | b0740 |                              |    |    |    |    |    | *    | *  |   |  |  | * |
| 778290         | 778811 | b0741 |                              |    |    |    |    |    | *    | *  |   |  |  | * |

|         | <i>E coli</i> | Gene     | Ref 16 | Ref 35 | Ref 34 | Ref 14 | Ref 49 | TW 99 | TW 97.5 | TW 95 |
|---------|---------------|----------|--------|--------|--------|--------|--------|-------|---------|-------|
| 778821  | 779612        | ybgF     | *      |        |        |        |        | *     | *       |       |
| 781308  | 782351        | nadA     | *      |        |        |        |        |       |         |       |
| 793996  | 794146        | b0762    |        |        | *      |        |        |       |         |       |
| 798845  | 799862        | ybhD     | *      | *      | *      | *      |        |       |         |       |
| 799982  | 801035        | ybhH     | *      | *      |        |        |        |       |         |       |
| 801110  | 802544        | b0770    |        |        | *      |        |        |       |         |       |
| 802702  | 804988        | b0771    |        |        | *      |        |        |       |         |       |
| 807191  | 808480        | b0774    |        |        |        |        |        |       | *       |       |
| 808567  | 809607        | b0775    |        |        |        |        |        |       | *       |       |
| 809604  | 810758        | b0776    |        |        |        |        |        |       | *       |       |
| 814962  | 815870        | b0780    | *      |        |        |        |        |       |         |       |
| 819107  | 819812        | b0786    |        |        | *      |        |        |       |         |       |
| 820016  | 820729        | ybhM     | *      | *      | *      | *      | *      |       |         |       |
| 820765  | 821722        | b0788    |        |        | *      |        |        |       |         |       |
| 824225  | 825332        | b0792    |        |        | *      |        |        |       |         |       |
| 825342  | 826476        | b0793    |        |        | *      |        |        |       |         |       |
| 826468  | 828220        | b0794    |        |        | *      |        |        |       |         |       |
| 831691  | 832174        | ybiA     |        |        | *      |        |        |       |         |       |
| 835574  | 836660        | ybiC     |        |        | *      |        |        |       |         |       |
| 841019  | 841423        | ybiM     |        |        |        | *      |        |       |         |       |
| 850237  | 851820        | ybiP     | *      |        |        |        |        |       |         |       |
| 851894  | 852163        | b0816    |        |        |        | *      |        |       |         |       |
| 858436  | 859251        | b0822    |        | *      |        |        |        |       |         |       |
| 872202  | 874550        | b0833    | *      | *      |        |        | *      | *     | *       |       |
| 874558  | 875886        | b0834    | *      | *      |        |        | *      | *     | *       |       |
| 877471  | 877854        | b0836    |        |        |        | *      |        |       |         |       |
| 884539  | 885327        | b0844    | *      | *      |        |        |        |       |         |       |
| 889312  | 889689        | ybjM     |        |        |        | *      |        |       |         |       |
| 889719  | 889977        | grxA     |        |        | *      |        |        |       |         |       |
| 899067  | 899798        | artJ     | *      |        |        |        |        |       |         |       |
| 913181  | 914128        | ybjE     | *      |        |        |        |        |       |         |       |
| 921589  | 921813        | cspD     |        |        |        |        | *      |       |         |       |
| 925951  | 926655        | aat      | *      |        |        |        |        |       |         |       |
| 944154  | 944781        | ycaC     |        |        | *      |        |        |       |         |       |
| 946260  | 947882        | b0899    | *      |        |        |        |        |       |         |       |
| 947883  | 948791        | ycaN     | *      | *      | *      |        |        |       |         |       |
| 948891  | 949482        | ycaK     |        |        | *      | *      | *      |       |         |       |
| 952832  | 953689        | focA     | *      |        |        |        |        |       |         |       |
| 959463  | 960251        | ycaL     | *      |        |        |        |        |       |         |       |
| 963465  | 965807        | ycaI     | *      |        |        | *      | *      |       |         |       |
| 970975  | 971868        | b0919    | *      |        |        |        |        |       |         |       |
| 974872  | 975549        | b0923    |        |        |        |        | *      | *     | *       |       |
| 975549  | 980009        | b0924    |        |        |        |        | *      | *     | *       |       |
| 997082  | 997631        | ycbQ     |        |        | *      | *      | *      |       |         |       |
| 997713  | 998415        | ycbR     | *      | *      | *      | *      |        | *     | *       |       |
| 998439  | 1001040       | ycbSfimD | *      | *      |        |        |        | *     | *       |       |
| 1001030 | 1002101       | ycbT     | *      | *      | *      | *      |        |       |         |       |
| 1002112 | 1002655       | b0942    |        |        | *      | *      |        |       |         |       |
| 1002614 | 1003178       | b0943    |        |        | *      | *      |        |       |         |       |
| 1003143 | 1003881       | ycbF     | *      | *      | *      |        |        |       |         |       |



| <i>E. coli</i> |         | Gene   | Ref Ref Ref Ref Ref TW TW TW |    |    |    |    |    |      |    |  |
|----------------|---------|--------|------------------------------|----|----|----|----|----|------|----|--|
| begin          | end     |        | 16                           | 35 | 34 | 14 | 49 | 99 | 97.5 | 95 |  |
| 1003991        | 1005001 | pyrD   |                              | *  |    |    |    |    |      |    |  |
| 1005714        | 1006823 | b0947  |                              | *  |    |    |    |    |      |    |  |
| 1011224        | 1012477 | pqiA   |                              | *  |    |    |    |    |      |    |  |
| 1014938        | 1015106 | rmf    |                              |    | *  | *  | *  |    |      |    |  |
| 1019633        | 1020142 | sulA   |                              |    |    | *  |    |    |      |    |  |
| 1032477        | 1034270 | b0973  |                              |    |    |    |    |    |      | *  |  |
| 1034289        | 1034996 | b0974  |                              |    |    |    |    |    |      | *  |  |
| 1039840        | 1041138 | appA   | *                            | *  |    |    |    |    |      |    |  |
| 1047168        | 1047914 | ymcB   | *                            |    |    |    |    |    |      |    |  |
| 1047911        | 1048556 | b0986  |                              |    | *  |    |    |    |      |    |  |
| 1048662        | 1048986 | ymcD   |                              |    | *  | *  |    |    |      |    |  |
| 1049250        | 1049754 | IS1B   |                              |    | *  |    |    |    |      |    |  |
| 1050186        | 1050398 | cspH   |                              |    |    |    | *  |    |      |    |  |
| 1050684        | 1050896 | cspG   |                              |    |    | *  |    |    |      |    |  |
| 1051070        | 1051301 | sfa    |                              |    | *  | *  | *  |    |      |    |  |
| 1051512        | 1052586 | yccM   | *                            | *  |    |    |    |    |      |    |  |
| 1063259        | 1064516 | yccE   | *                            | *  | *  | *  |    |    |      | *  |  |
| 1064808        | 1066049 | b1002  |                              |    |    |    |    | *  | *    |    |  |
| 1066087        | 1066314 | b1003  |                              |    |    |    |    | *  | *    |    |  |
| 1066335        | 1066931 | b1004  |                              |    |    |    |    | *  | *    |    |  |
| 1067141        | 1067372 | ycdF   |                              |    | *  | *  |    |    |      |    |  |
| 1067734        | 1069129 | b1006  |                              |    | *  |    |    |    |      |    |  |
| 1069588        | 1070178 | b1008  |                              |    |    |    |    |    |      | *  |  |
| 1070188        | 1070988 | b1009  |                              |    |    |    |    |    |      | *  |  |
| 1070996        | 1071382 | b1010  |                              |    |    |    |    |    |      | *  |  |
| 1084215        | 1085279 | phoH   |                              | *  |    |    |    |    |      |    |  |
| 1085329        | 1085742 | ycdP   | *                            |    | *  | *  | *  |    |      |    |  |
| 1085744        | 1087069 | ycdQ   | *                            | *  | *  |    |    |    |      |    |  |
| 1087062        | 1089080 | ycdR   | *                            | *  | *  | *  | *  | *  | *    | *  |  |
| 1089089        | 1091512 | ycdS   | *                            | *  | *  |    | *  | *  | *    | *  |  |
| 1092099        | 1093457 | ycdT   | *                            | *  | *  | *  | *  | *  | *    | *  |  |
| 1093498        | 1094364 | tra5_3 |                              |    |    | *  | *  | *  | *    | *  |  |
| 1094746        | 1095069 | IS3    | *                            | *  | *  |    | *  | *  | *    | *  |  |
| 1094361        | 1094670 | IS3    |                              |    | *  |    | *  | *  | *    | *  |  |
| 1094746        | 1095070 | ymdE   |                              |    | *  | *  | *  | *  | *    | *  |  |
| 1095066        | 1096052 | ycdU   | *                            | *  | *  | *  | *  | *  | *    | *  |  |
| 1096171        | 1096423 | b1030  |                              |    | *  | *  |    |    |      |    |  |
| 1096190        | 1096604 | ycdV   |                              |    | *  | *  |    |    |      |    |  |
| 1097070        | 1098047 | ycdW   |                              | *  |    |    |    |    |      |    |  |
| 1098102        | 1098839 | ycdX   |                              | *  |    |    |    |    |      |    |  |
| 1100074        | 1100908 | csgG   |                              |    | *  |    | *  | *  | *    | *  |  |
| 1100934        | 1101351 | csgF   | *                            |    | *  |    | *  | *  | *    | *  |  |
| 1101375        | 1101765 | csgE   | *                            |    | *  | *  | *  | *  | *    | *  |  |
| 1101769        | 1102420 | csgD   | *                            |    | *  | *  | *  | *  | *    | *  |  |
| 1103174        | 1103630 | csgB   | *                            |    | *  | *  | *  | *  | *    | *  |  |
| 1103670        | 1104126 | csgA   |                              |    | *  |    | *  | *  | *    | *  |  |
| 1104184        | 1104517 | csgC   | *                            |    | *  | *  | *  | *  | *    | *  |  |
| 1104637        | 1104949 |        | *                            |    | *  | *  | *  | *  | *    | *  |  |
| 1105043        | 1105577 | b1045  |                              |    | *  | *  |    | *  | *    | *  |  |
| 1105518        | 1106999 | ymdC   | *                            |    |    |    |    |    |      | *  |  |



| <i>E coli</i> |         | Gene     | Ref | Ref | Ref | Ref | Ref | TW | TW   | TW |
|---------------|---------|----------|-----|-----|-----|-----|-----|----|------|----|
| begin         | end     |          | 16  | 35  | 34  | 14  | 49  | 99 | 97.5 | 95 |
| 1220429       | 1221446 | b1170    | *   | *   | *   |     |     | *  | *    | *  |
| 1221528       | 1221864 | b1171    | *   |     | *   |     |     | *  | *    | *  |
| 1221867       | 1222152 | b1172    |     |     | *   |     |     | *  | *    | *  |
| 1222918       | 1223131 | b1173    |     |     | *   | *   |     |    |      |    |
| 1223502       | 1223769 | minE     |     |     | *   |     |     |    |      | *  |
| 1223772       | 1224585 | minD     |     |     | *   |     |     |    |      | *  |
| 1224608       | 1225304 | minC     |     |     | *   |     |     |    |      | *  |
| 1225823       | 1226192 | ycgJ     |     |     | *   | *   | *   |    |      |    |
| 1226294       | 1226696 | ycgK     |     |     | *   | *   | *   | *  | *    | *  |
| 1226904       | 1227231 | b1179    |     |     | *   |     |     | *  | *    | *  |
| 1227302       | 1227961 | b1180    |     |     |     |     | *   | *  | *    | *  |
| 1228023       | 1228499 | b1181    |     |     |     |     | *   | *  | *    | *  |
| 1228706       | 1229624 | hlyE     | *   | *   | *   | *   |     | *  | *    | *  |
| 1230409       | 1231677 | umuC     | *   |     |     |     |     |    |      |    |
| 1242289       | 1243014 | mltE     | *   |     |     |     |     |    |      |    |
| 1243016       | 1243750 | ycgR     | *   |     |     |     |     |    |      |    |
| 1244383       | 1244824 | ycgY     |     |     | *   | *   |     |    |      |    |
| 1250280       | 1252208 | dhaR     | *   |     |     |     |     |    |      |    |
| 1252308       | 1255175 | b1202    | *   | *   |     |     |     |    |      |    |
| 1267388       | 1268242 | kdsA     | *   |     |     |     |     |    |      |    |
| 1269972       | 1271072 | chaA     | *   |     |     |     |     |    |      |    |
| 1273148       | 1274401 | yehP     | *   |     |     |     |     |    |      |    |
| 1279087       | 1282830 | b1224    |     |     |     |     |     |    |      | *  |
| 1282827       | 1284365 | b1225    |     |     |     |     |     |    |      | *  |
| 1285932       | 1286208 | b1228    |     |     | *   | *   |     |    |      |    |
| 1286310       | 1286412 | tpr      |     |     | *   | *   |     |    |      |    |
| 1287897       | 1288356 | yehJ     |     |     | *   | *   | *   |    |      |    |
| 1288429       | 1289373 | rrsAychK | *   |     |     |     |     |    |      |    |
| 1289465       | 1290478 | hnrorn   | *   |     |     |     |     |    |      |    |
| 1292750       | 1293368 | tdk      |     |     | *   | *   | *   |    |      |    |
| 1293649       | 1294240 | yehG     |     |     | *   | *   |     |    |      |    |
| 1294191       | 1294422 | b1240    |     |     | *   |     |     |    |      |    |
| 1299206       | 1300837 | b1243    |     |     |     |     |     |    |      | *  |
| 1300923       | 1301843 | oppB     | *   |     |     |     |     |    |      |    |
| 1305209       | 1306669 | cls      | *   |     |     |     |     |    |      |    |
| 1307040       | 1308293 | kch      | *   | *   | *   |     |     |    |      |    |
| 1308593       | 1308986 | yciI     |     |     | *   | *   |     |    |      |    |
| 1309872       | 1310271 | yciA     |     |     | *   |     |     |    |      |    |
| 1310944       | 1311687 | b1255    |     |     |     |     |     |    |      | *  |
| 1312044       | 1312682 | b1256    |     |     |     |     |     |    |      | *  |
| 1312742       | 1313249 | yciE     |     |     | *   |     | *   |    |      | *  |
| 1313294       | 1313795 | yciF     |     |     | *   |     |     |    |      |    |
| 1313880       | 1314117 | yciG     |     |     | *   |     |     |    |      |    |
| 1321244       | 1322125 | yciV     | *   |     |     |     |     |    |      |    |
| 1322770       | 1324665 | yciQ     | *   | *   | *   |     |     |    |      |    |
| 1331879       | 1332853 | cysB     | *   |     |     |     | *   |    |      |    |
| 1337354       | 1338118 | pgpB     | *   |     |     |     | *   |    |      |    |
| 1340679       | 1341009 | yciH     |     |     | *   |     |     |    |      |    |
| 1341134       | 1341353 | osmB     |     |     | *   |     |     |    |      |    |
| 1341621       | 1342370 | b1284    | *   |     |     |     |     |    |      |    |



| <i>E coli</i> |         | Gene      | Ref |    |    | TW |    |    |      |    |
|---------------|---------|-----------|-----|----|----|----|----|----|------|----|
| begin         | end     |           | 16  | 35 | 34 | 14 | 49 | 99 | 97.5 | 95 |
| 1423202       | 1423484 | b1364     |     |    | *  | *  |    | *  | *    | *  |
| 1423401       | 1423665 | b1365     |     |    | *  |    |    | *  | *    | *  |
| 1423645       | 1424005 | b1366     |     |    | *  |    |    | *  | *    | *  |
| 1424079       | 1424313 | b1367     |     |    | *  | *  |    | *  | *    | *  |
| 1424478       | 1425507 | ynaA      | *   |    | *  | *  | *  | *  | *    | *  |
| 1425482       | 1425638 | b1369     |     |    | *  |    |    |    |      |    |
| 1425770       | 1426751 | IS5E      |     |    | *  |    |    |    |      |    |
| 1426547       | 1427009 | IS5       |     |    | *  | *  |    |    |      |    |
| 1427067       | 1430436 | b1372     | *   |    | *  | *  |    | *  | *    | *  |
| 1430435       | 1431011 | b1373     |     |    | *  |    |    | *  | *    | *  |
| 1431108       | 1431699 | pinR      | *   |    | *  | *  | *  | *  | *    | *  |
| 1432015       | 1432282 | ynaE      |     |    | *  | *  | *  | *  | *    | *  |
| 1433784       | 1434917 | ompN      | *   |    |    |    |    | *  | *    | *  |
| 1443711       | 1443897 | b1382     |     |    | *  |    |    |    |      |    |
| 1443898       | 1444231 | ydbL      |     |    | *  |    | *  |    |      |    |
| 1444402       | 1445307 | maoB      | *   |    |    |    |    |    |      |    |
| 1445540       | 1447042 | padA      | *   |    |    |    |    |    |      |    |
| 1451951       | 1452880 | ydbO      | *   |    |    |    |    |    |      |    |
| 1461563       | 1462513 | paaXb1399 | *   |    |    |    |    |    |      |    |
| 1462495       | 1463086 | b1400     |     |    | *  |    |    |    |      |    |
| 1463416       | 1465975 | ydbA_1    |     |    | *  | *  |    |    |      | *  |
| 1465945       | 1466851 | IS2       | *   |    | *  | *  |    |    |      | *  |
| 1466808       | 1467219 | IS2       |     |    | *  |    |    |    |      |    |
| 1467382       | 1468534 | IS30C     | *   |    | *  | *  |    |    |      |    |
| 1468714       | 1472038 | ydbA_2    | *   |    | *  |    |    |    |      |    |
| 1473162       | 1475475 | ydbD      | *   | *  | *  | *  |    | *  | *    | *  |
| 1475639       | 1476251 | b1408     |     |    | *  | *  |    | *  | *    | *  |
| 1476250       | 1477147 | ynbB      | *   | *  | *  | *  |    | *  | *    | *  |
| 1477162       | 1478920 | b1410     | *   | *  |    |    |    |    |      |    |
| 1478933       | 1480226 | ynbD      |     |    | *  | *  |    |    |      |    |
| 1485259       | 1486059 | ydcF      | *   |    |    |    |    |    |      |    |
| 1489701       | 1489875 | ydcA      |     |    | *  | *  |    |    |      |    |
| 1489986       | 1490154 | b1420     |     |    | *  | *  |    |    |      |    |
| 1490494       | 1492134 | trg       | *   |    |    |    |    |    |      |    |
| 1492172       | 1493236 | b1422     | *   |    |    | *  |    |    |      |    |
| 1496456       | 1496660 | b1425     |     |    | *  | *  |    |    |      |    |
| 1496732       | 1496900 | ydcH      |     |    | *  |    |    |    |      |    |
| 1497493       | 1498473 | b1428     | *   |    |    |    |    |    |      |    |
| 1501681       | 1502889 | yncK      | *   |    |    | *  | *  |    |      |    |
| 1502929       | 1504365 | b1433     | *   |    |    | *  |    |    |      |    |
| 1506858       | 1507088 | b1436     |     |    |    | *  |    |    |      |    |
| 1507274       | 1507472 | b1437     | *   |    |    | *  |    |    |      |    |
| 1507511       | 1507949 | b1438     | *   |    |    |    |    |    |      |    |
| 1511855       | 1512797 | b1442     | *   |    |    |    |    |    |      |    |
| 1515338       | 1515586 | b1445     |     |    |    | *  |    |    |      |    |
| 1518229       | 1518951 | yncC      | *   | *  |    | *  | *  |    |      |    |
| 1518987       | 1521089 | b1451     | *   |    |    |    |    |    |      |    |
| 1524271       | 1524889 | b1454     |     |    | *  |    |    |    |      |    |
| 1524964       | 1525177 | yncH      | *   |    | *  | *  | *  | *  | *    | *  |
| 1525914       | 1527963 | rhsE      |     |    | *  | *  |    | *  | *    | *  |

| <i>E coli</i> |         | Gene  | Ref Ref Ref Ref Ref TW TW TW |    |    |    |    |    |      |    |   |
|---------------|---------|-------|------------------------------|----|----|----|----|----|------|----|---|
| begin         | end     |       | 16                           | 35 | 34 | 14 | 49 | 99 | 97.5 | 95 |   |
| 1527946       | 1528429 | ydcD  | *                            |    | *  | *  | *  | *  | *    | *  | * |
| 1528610       | 1529357 | yncI  | *                            | *  | *  | *  | *  | *  | *    | *  | * |
| 1529400       | 1529601 | b1459 | *                            |    | *  | *  |    | *  | *    | *  | * |
| 1529840       | 1530977 | ydcC  | *                            | *  | *  | *  | *  | *  | *    | *  | * |
| 1531076       | 1531310 | ydcE  | *                            |    | *  | *  |    | *  | *    | *  | * |
| 1531306       | 1531924 | b1462 | *                            |    | *  |    |    | *  | *    | *  | * |
| 1540696       | 1542084 | narU  |                              | *  |    | *  |    | *  | *    | *  | * |
| 1542408       | 1542744 | yddJ  |                              |    | *  | *  | *  | *  | *    | *  | * |
| 1542782       | 1543739 | yddK  |                              | *  | *  | *  | *  | *  | *    | *  | * |
| 1543762       | 1544053 | b1472 |                              |    | *  |    |    | *  | *    | *  | * |
| 1544312       | 1545193 | yddG  | *                            |    |    |    |    | *  | *    | *  | * |
| 1545425       | 1548472 | fdnG  | *                            |    |    |    |    | *  | *    | *  | * |
| 1548485       | 1549369 | fdnH  |                              | *  |    |    |    |    |      |    |   |
| 1550422       | 1550785 | b1477 |                              |    | *  |    |    |    |      |    |   |
| 1553850       | 1553987 | rpsV  |                              |    |    | *  |    |    |      |    |   |
| 1554089       | 1554367 | b1481 |                              |    |    | *  |    |    |      |    |   |
| 1558955       | 1560506 | b1487 |                              |    | *  |    |    |    |      |    |   |
| 1560519       | 1561101 | b1488 |                              |    | *  |    |    |    |      |    |   |
| 1561358       | 1563782 | b1489 |                              |    | *  |    |    |    |      |    |   |
| 1563782       | 1565165 | yhcK  |                              | *  | *  |    |    |    |      |    |   |
| 1565528       | 1566847 | b1491 |                              | *  |    | *  |    |    |      |    |   |
| 1566978       | 1568514 | xasA  |                              |    | *  |    |    |    |      |    |   |
| 1568669       | 1570070 | gadB  |                              |    | *  |    |    |    |      |    |   |
| 1570431       | 1573227 | yddC  | *                            | *  | *  |    |    |    |      | *  | * |
| 1573271       | 1575644 | yddB  | *                            | *  | *  |    |    | *  | *    | *  | * |
| 1575681       | 1577367 | yddA  | *                            | *  | *  |    |    | *  | *    | *  | * |
| 1577657       | 1578830 | b1497 | *                            | *  | *  | *  |    | *  | *    | *  | * |
| 1578866       | 1580582 | ydeN  | *                            | *  | *  |    | *  | *  | *    | *  | * |
| 1580950       | 1581712 | ydeO  | *                            | *  | *  | *  | *  | *  | *    | *  | * |
| 1581786       | 1581984 | b1500 | *                            |    | *  | *  |    | *  | *    | *  | * |
| 1582231       | 1584511 | b1501 |                              | *  | *  |    |    | *  | *    | *  | * |
| 1584844       | 1585759 | ydeQ  | *                            | *  | *  | *  | *  | *  | *    | *  | * |
| 1585817       | 1586321 | ydeR  | *                            |    | *  | *  | *  | *  | *    | *  | * |
| 1586333       | 1586864 | ydeS  | *                            |    | *  | *  | *  | *  | *    | *  | * |
| 1586877       | 1588026 | ydeT  | *                            | *  | *  | *  | *  | *  | *    | *  | * |
| 1588381       | 1588561 | yneL  | *                            |    | *  |    | *  | *  | *    | *  | * |
| 1588878       | 1590201 | hipA  | *                            | *  | *  | *  |    | *  | *    | *  | * |
| 1590200       | 1590467 | hipB  |                              |    | *  | *  |    |    |      |    |   |
| 1590689       | 1592090 | b1509 |                              | *  | *  |    |    |    |      |    |   |
| 1592133       | 1596111 | ydeK  |                              | *  | *  | *  |    | *  | *    | *  | * |
| 1596641       | 1598233 | ydeV  |                              | *  |    |    |    |    |      |    |   |
| 1598312       | 1599265 | ydeW  |                              | *  |    |    |    |    |      |    |   |
| 1613787       | 1614902 | yneK  |                              | *  | *  | *  | *  |    |      |    |   |
| 1618013       | 1618231 | marB  |                              |    |    | *  | *  |    |      |    |   |
| 1619356       | 1620543 | ydeF  |                              | *  |    |    |    |    |      | *  | * |
| 1620984       | 1621874 | ydeH  |                              | *  | *  |    |    |    |      | *  | * |
| 1622797       | 1623315 | ydeJ  |                              |    |    |    | *  |    |      |    |   |
| 1623359       | 1625404 | dcp   |                              | *  |    |    |    |    |      |    |   |
| 1627477       | 1628937 | ydfI  |                              | *  |    |    |    | *  | *    | *  | * |
| 1629026       | 1630309 | b1543 |                              | *  |    |    |    | *  | *    | *  | * |

| <i>E. coli</i> |         | Gene  | Ref | Ref | Ref | Ref | Ref | TW | TW   | TW |
|----------------|---------|-------|-----|-----|-----|-----|-----|----|------|----|
| begin          | end     |       | 16  | 35  | 34  | 14  | 49  | 99 | 97.5 | 95 |
| 1631063        | 1631330 | ydfK  |     |     | *   | *   | *   | *  | *    | *  |
| 1631646        | 1632237 | pinQ  | *   |     | *   | *   | *   | *  | *    | *  |
| 1632261        | 1632909 | b1546 |     |     | *   |     |     | *  | *    | *  |
| 1632908        | 1633871 | b1547 |     | *   | *   | *   |     | *  | *    | *  |
| 1633821        | 1634391 | nohA  |     |     | *   |     |     | *  | *    | *  |
| 1635055        | 1635481 | ydfO  | *   |     | *   | *   | *   | *  | *    | *  |
| 1635632        | 1635809 | ydfY  |     |     | *   | *   | *   | *  | *    | *  |
| 1635977        | 1636169 | b1551 |     |     | *   | *   |     | *  | *    | *  |
| 1636478        | 1636691 | cspI  |     |     | *   |     | *   | *  | *    | *  |
| 1637053        | 1637551 | ydfP  |     |     | *   | *   | *   | *  | *    | *  |
| 1637547        | 1638081 | b1554 | *   |     | *   | *   |     | *  | *    | *  |
| 1638077        | 1638389 | ydfR  | *   |     | *   | *   | *   | *  | *    | *  |
| 1638393        | 1638684 | essQ  | *   |     | *   | *   | *   | *  | *    | *  |
| 1639362        | 1639578 | cspB  | *   |     | *   | *   | *   | *  | *    | *  |
| 1639878        | 1640091 | cspF  | *   |     | *   |     |     | *  | *    | *  |
| 1640512        | 1641295 | b1559 | *   | *   | *   | *   |     | *  | *    | *  |
| 1641278        | 1642367 | b1560 |     | *   | *   |     |     | *  | *    | *  |
| 1642674        | 1642926 | rem   | *   |     | *   | *   | *   |    |      |    |
| 1643142        | 1643298 | relF  |     |     | *   | *   |     |    |      | *  |
| 1643369        | 1643657 | relE  |     |     | *   | *   |     | *  | *    | *  |
| 1643656        | 1643896 | relB  |     |     | *   |     |     | *  | *    | *  |
| 1643920        | 1644226 | ydfV  | *   |     | *   | *   | *   | *  | *    | *  |
| 1644428        | 1644761 | flxA  | *   |     | *   |     | *   | *  | *    | *  |
| 1645197        | 1645347 | ydfW  | *   |     | *   | *   | *   | *  | *    | *  |
| 1645369        | 1645660 | ydfX  | *   |     | *   |     | *   | *  | *    | *  |
| 1645643        | 1645874 | dicC  | *   |     | *   | *   |     | *  | *    | *  |
| 1645957        | 1646365 | dicA  | *   |     | *   | *   | *   | *  | *    | *  |
| 1646531        | 1646687 | ydfA  |     |     | *   |     |     | *  | *    | *  |
| 1646646        | 1646817 | ydfB  | *   |     | *   |     |     | *  | *    | *  |
| 1646846        | 1647065 | ydfC  |     |     | *   |     |     | *  | *    | *  |
| 1647632        | 1647821 | dicB  | *   |     | *   | *   | *   |    |      | *  |
| 1647817        | 1648009 | ydfD  | *   |     | *   | *   | *   |    |      | *  |
| 1648101        | 1649022 | ydfE  |     | *   | *   | *   |     |    |      | *  |
| 1648904        | 1649561 | IS2E  |     | *   | *   | *   |     |    |      | *  |
| 1649535        | 1650732 | intQ  | *   | *   | *   | *   | *   |    |      | *  |
| 1650919        | 1651939 | rspB  | *   | *   | *   |     |     |    |      | *  |
| 1654770        | 1655517 | ynfC  |     | *   | *   |     |     |    |      |    |
| 1655547        | 1655894 | b1586 |     |     |     | *   |     |    |      |    |
| 1658577        | 1661003 | b1588 |     | *   |     |     |     |    |      |    |
| 1661633        | 1662487 | b1590 |     | *   |     |     |     |    |      |    |
| 1669372        | 1669708 | asr   |     |     | *   |     | *   |    |      |    |
| 1669984        | 1670805 | b1598 |     | *   |     |     |     |    |      |    |
| 1671160        | 1671525 | b1600 | *   |     |     |     |     |    |      |    |
| 1680174        | 1680902 | rstA  |     | *   |     |     |     |    |      |    |
| 1689610        | 1690863 | uidC  |     | *   | *   |     |     |    |      |    |
| 1690913        | 1692287 | uidB  |     |     | *   |     |     |    |      |    |
| 1692283        | 1694095 | uidA  |     |     | *   |     |     |    |      |    |
| 1694485        | 1695076 | gusR  |     |     | *   |     |     |    |      |    |
| 1695296        | 1696064 | hdhA  |     | *   | *   |     | *   |    |      |    |
| 1696176        | 1697204 | malI  |     | *   |     |     |     |    |      |    |





| <i>E coli</i> |         | Gene  | Ref Ref Ref Ref Ref TW TW TW |    |    |    |    |    |      |    |  |
|---------------|---------|-------|------------------------------|----|----|----|----|----|------|----|--|
| begin         | end     |       | 16                           | 35 | 34 | 14 | 49 | 99 | 97.5 | 95 |  |
| 1827755       | 1828789 | b1747 |                              |    |    |    |    |    |      | *  |  |
| 1831377       | 1832135 | ydjX  |                              |    |    | *  |    |    |      |    |  |
| 1831977       | 1832817 | ydjY  |                              | *  | *  |    |    |    |      |    |  |
| 1834094       | 1835263 | b1754 |                              |    |    |    |    | *  | *    |    |  |
| 1835281       | 1836771 | b1755 |                              |    |    |    |    | *  | *    |    |  |
| 1836771       | 1837424 | b1756 |                              |    |    |    |    | *  | *    |    |  |
| 1839887       | 1840159 | b1760 |                              |    |    | *  |    |    |      |    |  |
| 1841854       | 1843018 | ynjI  |                              | *  | *  | *  | *  |    |      |    |  |
| 1850644       | 1852003 | ydjE  |                              | *  | *  | *  |    |    |      |    |  |
| 1852119       | 1852878 | b1770 | *                            | *  | *  |    |    | *  | *    |    |  |
| 1853014       | 1853995 | b1771 | *                            | *  | *  |    |    | *  | *    |    |  |
| 1854004       | 1854973 | b1772 | *                            | *  | *  |    |    | *  | *    |    |  |
| 1854956       | 1855793 | b1773 | *                            | *  | *  |    |    | *  | *    |    |  |
| 1855813       | 1856857 | ydjJ  | *                            | *  |    |    |    |    | *    |    |  |
| 1856873       | 1858253 | b1775 | *                            | *  |    |    |    |    |      |    |  |
| 1858279       | 1859356 | b1776 | *                            | *  |    |    |    |    |      |    |  |
| 1862806       | 1863660 | b1781 | *                            |    |    |    |    |    |      |    |  |
| 1864932       | 1866866 | b1783 |                              |    |    |    |    |    |      | *  |  |
| 1866979       | 1868262 | b1784 |                              |    |    |    |    |    |      | *  |  |
| 1868409       | 1869884 | yhcK  | *                            | *  | *  |    |    | *  | *    | *  |  |
| 1869885       | 1871555 | yeaJ  | *                            | *  | *  |    |    | *  | *    | *  |  |
| 1872779       | 1873600 | yeaM  | *                            |    | *  |    | *  |    |      |    |  |
| 1873697       | 1874878 | yeaN  | *                            |    |    |    |    |    |      |    |  |
| 1875302       | 1875556 | yoaF  |                              |    | *  |    |    |    |      |    |  |
| 1875610       | 1876764 | yeaP  | *                            |    |    |    |    |    |      |    |  |
| 1877031       | 1877279 | yeaQ  |                              |    |    |    | *  |    |      |    |  |
| 1877613       | 1877972 | yeaR  |                              |    | *  |    |    |    |      |    |  |
| 1882688       | 1883813 | b1802 |                              | *  |    |    |    |    |      |    |  |
| 1883868       | 1884834 | yeaX  | *                            | *  |    |    |    |    |      |    |  |
| 1892096       | 1892456 | yoaC  |                              | *  | *  | *  | *  |    |      |    |  |
| 1902825       | 1903283 | b1820 |                              |    | *  |    |    |    |      |    |  |
| 1904275       | 1905084 | yebH  | *                            |    |    |    |    |    | *    |    |  |
| 1905471       | 1905615 | b1824 |                              | *  |    |    |    |    | *    |    |  |
| 1906284       | 1906572 | b1825 |                              | *  | *  |    |    |    | *    |    |  |
| 1913655       | 1914206 | b1832 |                              |    |    |    |    |    |      |    |  |
| 1918241       | 1919686 | yebU  | *                            |    | *  |    |    |    |      |    |  |
| 1919788       | 1920040 | b1836 |                              | *  |    |    |    |    |      |    |  |
| 1920060       | 1920336 | b1837 |                              | *  | *  |    |    |    |      |    |  |
| 1920336       | 1920996 | b1838 |                              | *  |    |    |    |    |      |    |  |
| 1921388       | 1921730 | b1839 |                              | *  |    |    |    |    |      |    |  |
| 1923464       | 1924120 | b1843 |                              |    | *  |    |    |    |      |    |  |
| 1934676       | 1935545 | yebK  | *                            |    |    |    |    |    |      |    |  |
| 1939675       | 1940661 | yebL  | *                            | *  | *  | *  | *  |    |      |    |  |
| 1940685       | 1941441 | b1858 |                              | *  |    |    |    |    |      |    |  |
| 1941437       | 1942223 | yebI  |                              | *  |    |    |    |    |      |    |  |
| 1944175       | 1944877 | yebB  | *                            | *  | *  | *  | *  |    |      |    |  |
| 1949419       | 1950237 | yecE  | *                            |    |    |    |    |    |      |    |  |
| 1955056       | 1956156 | yecK  | *                            | *  | *  |    |    |    |      |    |  |
| 1956544       | 1956984 | cutC  | *                            | *  | *  |    |    |    |      |    |  |
| 1959975       | 1960484 | yecT  | *                            | *  | *  | *  | *  |    |      |    |  |

| <i>E coli</i> |         | Gene         | Ref | Ref | Ref | Ref | Ref | TW | TW   | TW |
|---------------|---------|--------------|-----|-----|-----|-----|-----|----|------|----|
| begin         | end     |              | 16  | 35  | 34  | 14  | 49  | 99 | 97.5 | 95 |
| 1960604       | 1960996 | flhE         |     |     |     |     |     | *  |      |    |
| 1967406       | 1969008 | tap          |     |     | *   |     |     |    |      |    |
| 1975290       | 1975868 | flhC         |     |     |     | *   |     |    |      |    |
| 1976541       | 1977045 | IS1B         |     |     | *   |     |     |    |      |    |
| 1976963       | 1977239 | IS1A         |     |     | *   |     |     |    |      |    |
| 1977776       | 1978205 | yecG         |     |     | *   | *   | *   |    |      |    |
| 1985467       | 1985805 | b1903        |     |     |     | *   |     |    |      | *  |
| 1986245       | 1986568 | b1904        |     |     |     | *   |     |    |      | *  |
| 1986739       | 1987236 | b1905        |     |     |     |     |     |    |      | *  |
| 1987273       | 1987513 | yecH         |     |     | *   |     |     |    |      | *  |
| 1994133       | 1994855 | sdiA         |     | *   |     | *   |     |    |      |    |
| 2000133       | 2001629 | fliChaghsg48 |     | *   |     |     |     |    |      |    |
| 2007843       | 2008497 | yedG         |     |     | *   |     |     |    |      |    |
| 2008621       | 2009101 | yedL         |     |     | *   | *   |     |    |      |    |
| 2009369       | 2009561 | b1933        |     |     | *   | *   |     |    |      |    |
| 2009570       | 2009891 | yedN         | *   |     | *   | *   | *   |    |      |    |
| 2010022       | 2010373 | yedM         |     |     | *   | *   | *   |    |      |    |
| 2010523       | 2010802 | intG         |     |     | *   | *   | *   |    |      |    |
| 2012902       | 2013897 | b1939        |     |     |     |     |     | *  | *    |    |
| 2013869       | 2014576 | b1940        |     |     |     |     |     | *  | *    |    |
| 2014576       | 2015949 | b1941        |     |     |     |     |     | *  | *    |    |
| 2015968       | 2016411 | b1942        |     |     |     |     |     | *  | *    |    |
| 2016408       | 2017535 | fliK         |     | *   |     |     |     |    |      |    |
| 2021990       | 2022613 | rcsA         | *   |     | *   | *   | *   |    |      |    |
| 2023533       | 2024348 | wzx          |     | *   |     |     |     |    |      |    |
| 2031141       | 2031524 | yedR         | *   |     |     |     | *   |    |      |    |
| 2032043       | 2032558 | b1964        | *   |     | *   |     | *   | *  | *    |    |
| 2032568       | 2032777 | b1965        | *   |     | *   |     | *   | *  | *    |    |
| 2032861       | 2033265 | b1966        | *   |     |     |     | *   | *  | *    |    |
| 2033857       | 2034708 | yedU         | *   | *   |     |     | *   | *  | *    |    |
| 2034816       | 2036174 | yedV         | *   | *   | *   | *   | *   | *  | *    |    |
| 2036174       | 2036893 | yedW         | *   | *   | *   | *   | *   | *  | *    |    |
| 2036978       | 2037391 | yedX         | *   |     | *   | *   | *   | *  | *    |    |
| 2038505       | 2039140 | b1972        | *   |     |     |     | *   | *  | *    |    |
| 2039397       | 2040047 | yodA         | *   |     | *   | *   | *   | *  | *    |    |
| 2040360       | 2040920 | yodB         | *   |     | *   | *   | *   | *  | *    |    |
| 2041634       | 2042470 | yeeI         |     | *   | *   | *   | *   | *  | *    |    |
| 2042885       | 2050036 | b1978        | *   | *   | *   | *   |     | *  | *    |    |
| 2050297       | 2050624 | b1979        | *   |     | *   | *   |     |    | *    |    |
| 2050645       | 2051350 | yeeL         | *   | *   | *   | *   | *   |    | *    |    |
| 2051665       | 2052981 | shiA         | *   |     |     |     |     | *  | *    |    |
| 2053083       | 2054537 | amn          |     | *   | *   |     |     | *  | *    |    |
| 2054880       | 2055596 | yeeN         |     | *   | *   |     | *   | *  | *    |    |
| 2056225       | 2057868 | yeeO         |     | *   |     | *   |     | *  | *    |    |
| 2057986       | 2058936 | cbl          |     | *   |     |     | *   | *  | *    |    |
| 2059038       | 2059955 | nac          |     | *   | *   | *   | *   |    |      |    |
| 2060413       | 2061345 | erfK         |     | *   |     |     |     |    |      |    |
| 2061410       | 2062489 | cobT         |     | *   |     |     |     |    |      |    |
| 2064326       | 2065343 | IS5          |     |     | *   |     |     |    | *    |    |
| 2066629       | 2067049 | b1995        |     |     | *   | *   |     | *  | *    |    |

| <i>E coli</i> |         | Gene     | Ref | Ref | Ref | Ref | Ref | TW | TW   | TW |
|---------------|---------|----------|-----|-----|-----|-----|-----|----|------|----|
| begin         | end     |          | 16  | 35  | 34  | 14  | 49  | 99 | 97.5 | 95 |
| 2066973       | 2067879 | IS2F     | *   | *   |     |     |     | *  | *    | *  |
| 2067836       | 2068247 | IS2F     |     | *   |     |     | *   | *  | *    |    |
| 2068265       | 2068526 | b1998    |     | *   | *   |     | *   | *  | *    |    |
| 2068522       | 2069233 | b1999    |     | *   |     |     | *   | *  | *    |    |
| 2069404       | 2072680 | b2000    |     | *   |     |     | *   | *  | *    |    |
| 2072794       | 2074333 | yeeS     | *   | *   | *   |     | *   | *  | *    |    |
| 2074329       | 2074776 | b2002    |     | *   | *   |     | *   | *  | *    |    |
| 2074838       | 2075060 | b2003    |     | *   |     |     | *   | *  | *    |    |
| 2075133       | 2075502 | yeeU     |     | *   | *   |     | *   | *  | *    |    |
| 2075590       | 2075965 | b2005    |     | *   |     |     | *   | *  | *    |    |
| 2075961       | 2076156 | b2006    |     | *   |     |     | *   | *  | *    |    |
| 2079403       | 2080575 | dacDphsE | *   |     |     |     |     |    |      |    |
| 2082247       | 2082475 | yeeD     |     | *   |     |     |     |    |      |    |
| 2082488       | 2083547 | yeeE     | *   | *   |     |     |     |    |      |    |
| 2085351       | 2086301 | yeeY     | *   |     |     |     |     |    |      |    |
| 2087483       | 2087762 | yefM     |     | *   |     |     | *   |    |      |    |
| 2088020       | 2088070 | hisL     |     |     |     |     | *   |    |      |    |
| 2089119       | 2090423 | b2020    |     |     |     |     |     |    | *    |    |
| 2090420       | 2091490 | b2021    |     |     |     |     |     |    | *    |    |
| 2091487       | 2092557 | b2022    |     |     |     |     |     |    | *    |    |
| 2092557       | 2093147 | b2023    |     |     |     |     |     |    | *    |    |
| 2095343       | 2096359 | wzzB     | *   |     |     |     |     |    |      |    |
| 2096469       | 2097635 | ugd      | *   |     | *   |     |     |    |      |    |
| 2097884       | 2099290 | b2029    |     |     |     |     | *   | *  | *    |    |
| 2099916       | 2100933 | IS5I     |     | *   |     |     | *   | *  | *    |    |
| 2100937       | 2101411 | yefJ     | *   | *   | *   | *   | *   | *  | *    |    |
| 2101412       | 2102531 | yefI     | *   | *   | *   | *   | *   | *  | *    |    |
| 2102515       | 2103106 | yefH     | *   | *   | *   | *   | *   | *  | *    |    |
| 2103086       | 2104079 | yefG     | *   | *   | *   | *   | *   | *  | *    |    |
| 2104081       | 2105248 | rfc      | *   | *   | *   | *   | *   | *  | *    |    |
| 2105247       | 2106351 | yefE     | *   | *   | *   | *   | *   | *  | *    |    |
| 2106358       | 2107606 | rfbX     | *   | *   | *   | *   | *   | *  | *    |    |
| 2107602       | 2108160 | rfbC     | *   | *   | *   | *   | *   | *  | *    |    |
| 2108159       | 2109041 | rfbA     | *   | *   | *   | *   | *   | *  | *    |    |
| 2109098       | 2109998 | rfbD     | *   | *   | *   | *   | *   | *  | *    |    |
| 2109997       | 2111083 | rfbB     | *   | *   | *   | *   | *   | *  | *    |    |
| 2112524       | 2113918 | yefKwcaM | *   |     |     |     |     |    |      |    |
| 2116701       | 2118180 | b2046    |     | *   |     |     |     |    |      |    |
| 2118181       | 2119576 | b2047    |     | *   |     |     |     |    |      |    |
| 2126362       | 2126910 | wcaF     |     |     | *   |     |     |    |      |    |
| 2126926       | 2127672 | wcaE     | *   |     | *   |     |     |    |      |    |
| 2127683       | 2128900 | wcaD     | *   |     |     |     |     |    |      |    |
| 2147061       | 2149007 | b2070    | *   | *   |     |     |     |    |      |    |
| 2149206       | 2149668 | yegJ     |     | *   | *   | *   |     |    |      |    |
| 2149732       | 2150494 | b2072    | *   | *   |     |     |     |    |      |    |
| 2150490       | 2151150 | b2073    |     | *   |     |     |     |    |      |    |
| 2153285       | 2156407 | b2075    |     |     |     |     | *   | *  |      |    |
| 2156408       | 2159485 | b2076    |     |     |     |     | *   | *  |      |    |
| 2163171       | 2163543 | b2080    |     | *   |     |     |     |    |      |    |
| 2165323       | 2165542 | ogrK     |     | *   | *   |     |     |    |      |    |

| <i>E coli</i> |         | Gene   | Ref | Ref | Ref | Ref | Ref | TW | TW   | TW |
|---------------|---------|--------|-----|-----|-----|-----|-----|----|------|----|
| begin         | end     |        | 16  | 35  | 34  | 14  | 49  | 99 | 97.5 | 95 |
| 2165623       | 2165770 | b2083  |     |     | *   | *   |     |    |      |    |
| 2165756       | 2166023 | b2084  |     |     | *   | *   |     |    |      |    |
| 2166010       | 2166388 | yegR   | *   |     | *   | *   | *   |    |      |    |
| 2166733       | 2167633 | b2086  |     | *   | *   |     |     |    |      |    |
| 2168553       | 2169420 | IS3    |     | *   | *   | *   |     |    |      |    |
| 2169855       | 2170895 | gatD   |     | *   |     |     |     |    |      |    |
| 2172301       | 2172586 | gatB   |     |     | *   |     |     |    |      |    |
| 2172616       | 2173069 | gatA   |     |     | *   | *   | *   |    |      |    |
| 2173079       | 2174341 | gatZ   |     | *   |     |     |     |    |      |    |
| 2180853       | 2181680 | yegX   |     | *   | *   |     |     |    |      |    |
| 2182533       | 2183321 | thiM   |     | *   |     |     |     |    |      |    |
| 2183937       | 2184761 | yohM   |     | *   |     |     |     |    |      | *  |
| 2184800       | 2185318 | b2107  | *   |     |     | *   |     | *  | *    | *  |
| 2185400       | 2186434 | yehA   | *   | *   | *   | *   | *   | *  | *    | *  |
| 2186450       | 2188930 | yehB   | *   | *   | *   |     | *   | *  | *    | *  |
| 2188946       | 2189665 | yehC   | *   | *   | *   | *   | *   | *  | *    | *  |
| 2189700       | 2190242 | yehD   | *   |     | *   |     | *   | *  | *    | *  |
| 2190535       | 2190816 | yehE   | *   |     | *   | *   | *   | *  | *    | *  |
| 2191079       | 2192218 | b2113  |     |     |     |     |     | *  | *    |    |
| 2194494       | 2195318 | molR_1 | *   | *   | *   | *   |     |    |      |    |
| 2195430       | 2197367 | molR-2 |     | *   | *   | *   |     |    |      |    |
| 2197287       | 2198289 | b2117  |     |     | *   |     |     |    |      |    |
| 2198298       | 2201931 | yehI   |     | *   | *   |     |     |    |      |    |
| 2202549       | 2203704 | yehL   |     |     | *   |     |     |    |      |    |
| 2203714       | 2205994 | yehM   |     |     | *   |     |     | *  | *    |    |
| 2205986       | 2207123 | yehP   |     |     | *   |     |     | *  | *    |    |
| 2207095       | 2208964 | yehQ   | *   | *   | *   |     |     | *  | *    |    |
| 2214501       | 2215427 | b2129  |     |     |     |     |     |    |      | *  |
| 2215420       | 2216577 | b2130  |     |     |     |     |     |    |      | *  |
| 2226569       | 2226859 | yohH   |     |     |     | *   |     |    |      |    |
| 2230896       | 2231616 | sanA   |     | *   | *   |     |     |    |      |    |
| 2231618       | 2231858 | b2144  |     |     | *   | *   |     |    |      |    |
| 2232053       | 2233291 | b2146  |     | *   |     |     |     |    |      |    |
| 2233279       | 2234520 | yeiA   |     | *   |     |     |     |    |      |    |
| 2235789       | 2237309 | mgIA   |     | *   |     |     |     |    |      |    |
| 2249718       | 2250807 | yeiI   |     |     | *   |     |     |    |      |    |
| 2250913       | 2252164 | yeiJ   |     |     | *   |     |     |    |      |    |
| 2252263       | 2253205 | yeiK   |     |     | *   |     |     |    |      |    |
| 2253373       | 2254033 | yeiL   |     |     | *   | *   |     |    |      |    |
| 2254103       | 2255354 | yeiM   |     |     | *   |     |     |    |      |    |
| 2255447       | 2256386 | yeiN   |     |     | *   |     |     |    |      |    |
| 2256373       | 2257315 | yeiC   |     | *   | *   |     |     |    |      |    |
| 2263215       | 2264042 | yeiP   |     |     |     | *   |     |    |      |    |
| 2266838       | 2267587 | b2174  |     | *   |     | *   |     |    |      |    |
| 2284410       | 2286920 | yejO   |     | *   | *   | *   |     |    |      |    |
| 2286923       | 2287046 | b2191  |     |     | *   | *   |     |    |      |    |
| 2287083       | 2288100 | IS5K   |     |     | *   |     |     |    |      |    |
| 2289378       | 2290430 | b2194  |     |     |     |     |     |    |      | *  |
| 2290427       | 2290984 | b2195  |     |     |     |     |     |    |      | *  |
| 2290981       | 2292924 | b2196  |     |     |     |     | *   |    |      | *  |

| <i>E coli</i> |         | Gene     | Ref | Ref | Ref | Ref | Ref | TW | TW   | TW |
|---------------|---------|----------|-----|-----|-----|-----|-----|----|------|----|
| begin         | end     |          | 16  | 35  | 34  | 14  | 49  | 99 | 97.5 | 95 |
| 2292921       | 2293400 | b2197    |     |     |     |     |     |    | *    | *  |
| 2293397       | 2293606 | b2198    |     |     |     |     |     |    | *    | *  |
| 2293603       | 2294340 | b2199    |     |     |     |     |     |    | *    | *  |
| 2297585       | 2298280 | b2205    |     |     |     |     |     |    | *    | *  |
| 2298287       | 2300773 | b2206    |     |     |     |     |     |    | *    | *  |
| 2301023       | 2301517 | napF     |     |     |     | *   |     |    |      |    |
| 2317835       | 2319662 | atoS     |     | *   | *   |     |     |    |      |    |
| 2319658       | 2321044 | atoC     |     |     | *   |     |     |    |      |    |
| 2321239       | 2321902 | b2221    |     |     | *   |     |     |    |      |    |
| 2321901       | 2322552 | b2222    |     |     | *   |     |     |    |      |    |
| 2322548       | 2323871 | b2223    |     |     | *   |     |     |    |      |    |
| 2323901       | 2325086 | b2224    |     |     | *   |     |     |    |      |    |
| 2325159       | 2325936 | b2225    |     | *   | *   |     |     |    |      |    |
| 2325940       | 2327590 | b2226    |     | *   | *   |     |     |    |      |    |
| 2327590       | 2328076 | b2227    |     |     | *   |     |     |    |      |    |
| 2328091       | 2332105 | b2228    |     |     | *   |     |     |    |      |    |
| 2332128       | 2332779 | b2229    |     |     | *   |     |     |    |      |    |
| 2332748       | 2334485 | yfaA     |     |     | *   |     |     |    |      |    |
| 2338209       | 2341962 | yfaL     |     | *   | *   |     |     |    |      |    |
| 2346614       | 2347265 | inaA     |     |     | *   |     |     |    |      |    |
| 2347479       | 2347686 | yfaH     |     |     | *   |     | *   |    |      |    |
| 2354924       | 2355823 | yfaDyhgA |     | *   |     |     |     |    |      |    |
| 2359449       | 2360231 | b2248?   |     | *   |     |     |     |    |      |    |
| 2362810       | 2363413 | ais      |     |     | *   | *   |     |    |      |    |
| 2363915       | 2365087 | b2253    |     | *   |     |     |     |    |      |    |
| 2370630       | 2371298 | b2258    |     |     |     | *   |     |    |      |    |
| 2371292       | 2371588 | pmrD     |     |     |     | *   |     |    |      |    |
| 2373020       | 2373982 | b2261    |     |     |     |     | *   | *  | *    |    |
| 2373982       | 2374839 | menB     | *   |     |     |     | *   | *  | *    |    |
| 2374854       | 2375612 | b2263    |     |     |     |     | *   | *  | *    |    |
| 2375609       | 2377279 | b2264    |     |     |     |     | *   | *  | *    |    |
| 2379610       | 2380545 | b2268    |     |     |     |     |     |    | *    |    |
| 2380733       | 2381944 | elaD     | *   | *   | *   | *   | *   | *  | *    |    |
| 2382015       | 2383742 | yfbK     | *   | *   | *   |     | *   | *  | *    |    |
| 2383874       | 2384851 | yfbL     | *   | *   | *   | *   | *   | *  | *    |    |
| 2384954       | 2385457 | yfbM     | *   |     | *   |     | *   | *  | *    |    |
| 2385730       | 2386446 | yfbN     | *   | *   | *   | *   | *   | *  | *    |    |
| 2386601       | 2387077 | yfbO     | *   |     | *   | *   | *   | *  | *    |    |
| 2387133       | 2387984 | yfbP     | *   | *   | *   | *   |     |    | *    |    |
| 2389532       | 2391061 | b2277    |     |     |     |     | *   | *  | *    |    |
| 2391225       | 2393066 | b2278    |     |     |     |     | *   | *  | *    |    |
| 2393063       | 2393365 | b2279    |     |     |     |     | *   | *  | *    |    |
| 2393362       | 2393916 | b2280    |     |     |     |     | *   | *  | *    |    |
| 2393928       | 2394470 | b2281    |     |     |     |     | *   | *  | *    |    |
| 2394485       | 2395462 | b2282    |     |     |     |     | *   | *  | *    |    |
| 2395459       | 2398191 | b2283    |     |     |     |     | *   | *  | *    |    |
| 2398238       | 2399575 | b2284    |     |     |     |     |     |    | *    |    |
| 2399572       | 2400072 | b2285    |     |     |     |     |     |    | *    |    |
| 2412767       | 2414911 | pta      |     | *   |     |     |     |    |      |    |
| 2420669       | 2421559 | yfcI     |     | *   |     | *   |     |    |      |    |

| <i>E coli</i> |         | Gene     | Ref Ref Ref Ref Ref TW TW TW |    |    |    |    |    |      |    |  |
|---------------|---------|----------|------------------------------|----|----|----|----|----|------|----|--|
| begin         | end     |          | 16                           | 35 | 34 | 14 | 49 | 99 | 97.5 | 95 |  |
| 2425029       | 2425811 | argT     |                              | *  |    |    |    |    |      |    |  |
| 2438405       | 2439625 | fabB     |                              | *  |    |    |    |    |      |    |  |
| 2439724       | 2441790 | b2324    |                              | *  |    |    |    |    |      |    |  |
| 2445528       | 2446793 | yfcB     |                              |    |    | *  |    |    |      |    |  |
| 2447248       | 2448084 | yfcO     | *                            | *  | *  | *  | *  |    |      |    |  |
| 2449092       | 2449604 | b2335    |                              |    |    | *  |    |    |      |    |  |
| 2451285       | 2453021 | yfcUpapC |                              | *  |    |    |    |    |      |    |  |
| 2459320       | 2460666 | fadL     |                              | *  |    |    |    | *  | *    | *  |  |
| 2461032       | 2462090 | yfdF     |                              | *  |    | *  | *  | *  | *    | *  |  |
| 2464565       | 2465722 | yfdB     | *                            | *  | *  | *  | *  | *  | *    | *  |  |
| 2465875       | 2466237 | yfdG     | *                            |    | *  | *  | *  | *  | *    | *  |  |
| 2466234       | 2467154 | yfdH     | *                            | *  | *  | *  | *  | *  | *    | *  |  |
| 2467151       | 2468482 | yfdI     | *                            | *  | *  | *  | *  | *  | *    | *  |  |
| 2468553       | 2468898 | b2353    |                              |    | *  |    |    | *  | *    | *  |  |
| 2469097       | 2469537 | yfdK     | *                            |    | *  |    | *  | *  | *    | *  |  |
| 2469564       | 2470082 | yfdL     | *                            |    | *  | *  | *  | *  | *    | *  |  |
| 2469904       | 2470213 | b2355    |                              |    | *  |    |    | *  | *    | *  |  |
| 2470179       | 2470674 | b2357    |                              |    | *  |    |    | *  | *    | *  |  |
| 2470670       | 2471039 | b2358    |                              |    | *  | *  |    |    |      | *  |  |
| 2471312       | 2471759 | b2359    |                              |    | *  |    |    |    |      |    |  |
| 2471824       | 2472649 | b2360    |                              | *  | *  |    |    |    |      |    |  |
| 2472749       | 2473313 | b2361    |                              |    | *  | *  |    |    |      | *  |  |
| 2473303       | 2473666 | yfdS     |                              |    | *  |    | *  |    |      | *  |  |
| 2473665       | 2473971 | yfdT     |                              |    | *  |    | *  |    |      | *  |  |
| 2474714       | 2475649 | dsdC     | *                            | *  |    | *  |    |    |      | *  |  |
| 2475867       | 2477204 | dsdX     | *                            |    |    |    |    |    |      | *  |  |
| 2477222       | 2478550 | dsdA     |                              | *  |    |    |    | *  | *    | *  |  |
| 2478658       | 2480196 | emrY     | *                            | *  | *  | *  | *  | *  | *    | *  |  |
| 2480196       | 2481359 | emrK     | *                            | *  | *  | *  | *  | *  | *    | *  |  |
| 2481775       | 2482389 | evgA     | *                            |    | *  | *  | *  | *  | *    | *  |  |
| 2482394       | 2485987 | evgS     | *                            | *  | *  | *  | *  | *  | *    | *  |  |
| 2486043       | 2487227 | yfdE     | *                            | *  | *  | *  | *  | *  | *    | *  |  |
| 2487262       | 2488206 | yfdV     | *                            | *  | *  | *  | *  | *  | *    | *  |  |
| 2488276       | 2489970 | b2373    | *                            | *  | *  |    | *  | *  | *    | *  |  |
| 2490024       | 2491274 | b2374    | *                            | *  | *  |    | *  | *  | *    | *  |  |
| 2491559       | 2492195 | b2375    |                              |    | *  |    | *  | *  | *    | *  |  |
| 2492718       | 2492993 | ypdI     | *                            |    |    | *  | *  | *  | *    | *  |  |
| 2493070       | 2493312 | b2377    |                              |    |    |    |    | *  | *    | *  |  |
| 2493599       | 2494585 | b2378    |                              |    |    |    |    | *  | *    | *  |  |
| 2498922       | 2499780 | b2381    |                              |    | *  |    |    |    |      |    |  |
| 2499782       | 2502278 | b2383    |                              |    | *  |    |    | *  | *    | *  |  |
| 2502302       | 2503340 | b2384    |                              |    | *  |    |    | *  | *    | *  |  |
| 2503339       | 2504425 | b2385    |                              |    | *  |    |    | *  | *    | *  |  |
| 2504439       | 2505687 | b2386    |                              |    | *  |    |    |    |      |    |  |
| 2505708       | 2506035 | b2387    |                              |    | *  |    |    |    |      |    |  |
| 2507650       | 2508906 | b2389    |                              | *  |    |    |    |    |      |    |  |
| 2509085       | 2509429 | b2391    |                              |    |    | *  |    |    |      |    |  |
| 2512345       | 2513463 | yi813    |                              | *  | *  | *  |    |    |      |    |  |
| 2513663       | 2515969 | yfeA     |                              | *  |    |    |    |    |      |    |  |
| 2516244       | 2516604 | yfeC     |                              |    | *  |    |    |    |      |    |  |

| <i>E coli</i> |         | Gene     | Ref | Ref | Ref | Ref | Ref | TW | TW   | TW |
|---------------|---------|----------|-----|-----|-----|-----|-----|----|------|----|
| begin         | end     |          | 16  | 35  | 34  | 14  | 49  | 99 | 97.5 | 95 |
| 2516605       | 2516998 | yfeD     |     |     | *   |     | *   |    |      |    |
| 2519613       | 2520497 | xapRpndR |     | *   |     |     |     |    |      |    |
| 2523147       | 2523911 | xapAP    |     | *   |     |     |     |    |      |    |
| 2535769       | 2536503 | molR     |     | *   | *   | *   |     |    |      |    |
| 2537737       | 2538834 | b2422    |     |     |     |     |     |    |      | *  |
| 2538824       | 2539273 | b2423    |     |     |     |     |     |    |      | *  |
| 2539699       | 2540532 | b2424    |     |     |     |     |     |    |      | *  |
| 2542772       | 2543629 | yefTyfhH |     | *   | *   |     |     |    |      |    |
| 2556791       | 2558086 | b2442    |     | *   | *   | *   |     |    |      |    |
| 2558050       | 2558692 | yffL     |     |     | *   | *   | *   |    |      |    |
| 2559161       | 2559407 | b2444    |     |     | *   | *   |     |    |      | *  |
| 2559403       | 2559787 | yffN     |     |     | *   | *   | *   |    |      | *  |
| 2559904       | 2560321 | yffO     |     |     | *   | *   | *   |    |      | *  |
| 2560317       | 2560911 | b2447    |     |     | *   | *   |     |    |      | *  |
| 2561370       | 2561763 | yffQ     | *   |     | *   | *   | *   |    |      | *  |
| 2561773       | 2562166 | yffR     | *   |     | *   | *   | *   |    |      |    |
| 2562286       | 2563126 | b2450    |     | *   | *   |     |     |    |      |    |
| 2563501       | 2564904 | b2451    |     |     |     |     | *   | *  | *    |    |
| 2564901       | 2566127 | b2452    |     |     |     |     | *   | *  | *    |    |
| 2566344       | 2567558 | eutG     | *   |     |     |     | *   | *  | *    |    |
| 2567521       | 2568357 | eutJ     | *   |     |     |     | *   | *  | *    |    |
| 2568368       | 2569771 | eutE     | *   |     |     |     | *   | *  | *    |    |
| 2569783       | 2570070 | cchB     | *   |     |     |     | *   | *  | *    |    |
| 2570177       | 2570512 | cchA     | *   |     |     |     | *   | *  | *    |    |
| 2570509       | 2571525 | eutI     | *   |     |     |     | *   | *  | *    |    |
| 2571522       | 2572325 | b2459    | *   |     |     |     |     |    |      | *  |
| 2572322       | 2573023 | b2460    | *   |     |     |     |     |    |      |    |
| 2573490       | 2573897 | b2462    |     |     |     | *   |     |    |      |    |
| 2591864       | 2593879 | ypfI     |     | *   |     |     |     |    |      |    |
| 2599182       | 2599838 | hyfA     |     |     |     | *   |     |    |      |    |
| 2602604       | 2604044 | b2484    |     |     | *   |     |     |    |      |    |
| 2604055       | 2604706 | b2485    |     |     | *   |     |     |    |      |    |
| 2604710       | 2606291 | b2486    |     |     | *   |     |     |    |      |    |
| 2608726       | 2609484 | hyfI     |     | *   |     |     |     |    |      |    |
| 2611954       | 2612802 | focAfocB |     | *   |     |     |     |    |      |    |
| 2624715       | 2626958 | b2503    |     | *   |     |     |     |    |      |    |
| 2627083       | 2627275 | b2504    |     |     | *   | *   |     |    |      |    |
| 2627585       | 2628104 | b2505    |     |     | *   | *   |     |    |      |    |
| 2628119       | 2628659 | b2506    |     |     | *   |     |     |    |      |    |
| 2633392       | 2633644 | b2510    |     |     | *   | *   |     |    |      |    |
| 2653095       | 2654465 | b2523    |     |     |     |     |     |    |      | *  |
| 2654556       | 2654756 | b2524    |     |     |     |     |     |    |      | *  |
| 2654768       | 2655103 | b2525    |     |     |     |     |     |    |      | *  |
| 2655105       | 2656955 | b2526    |     |     |     |     |     |    |      | *  |
| 2662383       | 2663264 | b2534    |     | *   |     |     |     |    |      |    |
| 2663434       | 2664735 | csiE     |     | *   |     |     |     |    |      |    |
| 2666026       | 2666916 | alsR     |     | *   | *   |     |     |    |      |    |
| 2666825       | 2668187 | b2538    |     |     | *   |     |     |    |      |    |
| 2668183       | 2668702 | b2539    |     |     | *   |     |     |    |      |    |
| 2668701       | 2669022 | b2540    |     |     | *   |     |     |    |      |    |

| <i>E. coli</i> |         | Gene  | Ref Ref Ref Ref Ref TW TW TW |    |    |    |    |    |      |    |  |
|----------------|---------|-------|------------------------------|----|----|----|----|----|------|----|--|
| begin          | end     |       | 16                           | 35 | 34 | 14 | 49 | 99 | 97.5 | 95 |  |
| 2669018        | 2669831 | b2541 |                              |    | *  |    |    |    |      |    |  |
| 2669840        | 2671043 | b2542 |                              |    | *  |    |    |    |      |    |  |
| 2671067        | 2671562 | b2543 |                              |    | *  | *  |    |    |      |    |  |
| 2671609        | 2672482 | b2544 |                              |    | *  |    |    |    |      |    |  |
| 2672493        | 2673588 | b2545 |                              |    | *  |    |    |    |      |    |  |
| 2673620        | 2674619 | b2546 |                              |    | *  |    |    |    |      |    |  |
| 2674643        | 2676155 | b2547 |                              |    | *  |    |    |    |      |    |  |
| 2676177        | 2677161 | mglB  |                              | *  | *  |    |    |    |      |    |  |
| 2677257        | 2680632 | b2549 |                              |    | *  |    |    |    |      |    |  |
| 2680650        | 2681850 | b2550 |                              |    | *  |    |    |    |      |    |  |
| 2682274        | 2683527 | glyA  |                              | *  |    |    |    |    |      |    |  |
| 2697683        | 2697943 | yfhL  |                              |    |    | *  |    |    |      |    |  |
| 2710047        | 2710904 | yfiC  |                              | *  |    |    |    |    |      |    |  |
| 2712459        | 2713385 | yfiE  |                              | *  |    |    |    |    |      |    |  |
| 2717219        | 2717941 | yfiP  |                              | *  |    |    |    |    |      |    |  |
| 2722468        | 2723766 | kgtP  |                              | *  |    |    |    |    | *    |    |  |
| 2732323        | 2733054 | yfiH  |                              | *  |    |    |    |    |      |    |  |
| 2734706        | 2734913 | b2596 |                              |    | *  | *  |    |    |      |    |  |
| 2735621        | 2735668 | pheL  |                              |    |    |    | *  |    |      |    |  |
| 2739114        | 2739519 | yfiL  | *                            |    | *  | *  | *  |    |      |    |  |
| 2739668        | 2740187 | b2603 |                              |    | *  | *  |    |    |      |    |  |
| 2740403        | 2741629 | yfiN  |                              | *  |    |    |    |    |      |    |  |
| 2741418        | 2741901 | yfiB  |                              |    | *  |    |    |    |      |    |  |
| 2748136        | 2748729 | grpE  |                              | *  |    |    |    |    |      |    |  |
| 2752309        | 2752785 | b2619 | *                            |    |    |    |    |    |      |    |  |
| 2754180        | 2755421 | intA  | *                            | *  | *  | *  | *  | *  | *    | *  |  |
| 2755665        | 2756621 | yfjH  | *                            | *  | *  | *  | *  | *  | *    | *  |  |
| 2756665        | 2756877 | alpA  | *                            |    | *  | *  | *  | *  | *    | *  |  |
| 2757006        | 2758415 | yfjI  | *                            | *  | *  | *  | *  | *  | *    | *  |  |
| 2758568        | 2759194 | yfjJ  | *                            |    | *  | *  | *  | *  | *    | *  |  |
| 2759145        | 2761335 | yfjK  |                              | *  | *  | *  | *  | *  | *    | *  |  |
| 2761331        | 2762948 | yfjL  |                              | *  | *  | *  | *  | *  | *    | *  |  |
| 2763307        | 2763571 | yfjM  | *                            |    | *  | *  | *  | *  | *    | *  |  |
| 2763712        | 2764786 | yfjN  | *                            | *  | *  | *  | *  | *  | *    | *  |  |
| 2764829        | 2765150 | yfjO  | *                            |    | *  |    |    | *  | *    | *  |  |
| 2765498        | 2766368 | b2632 |                              |    | *  |    |    | *  | *    | *  |  |
| 2766459        | 2767281 | b2633 |                              |    | *  |    |    |    | *    | *  |  |
| 2767497        | 2768199 | b2634 |                              |    | *  |    |    |    |      |    |  |
| 2768310        | 2768702 | b2635 |                              |    |    | *  |    |    |      |    |  |
| 2768083        | 2768920 | b2636 |                              |    | *  | *  |    |    |      |    |  |
| 2768943        | 2769411 | b2637 |                              |    | *  |    |    |    |      | *  |  |
| 2769635        | 2769950 | b2638 |                              |    | *  | *  | *  | *  | *    | *  |  |
| 2770188        | 2770706 | b2639 |                              |    |    | *  | *  | *  | *    | *  |  |
| 2770857        | 2771057 | b2640 |                              |    |    | *  | *  | *  | *    | *  |  |
| 2770997        | 2771113 | b2641 |                              |    |    | *  | *  | *  | *    | *  |  |
| 2771113        | 2772817 | yfjW  | *                            | *  | *  | *  | *  | *  | *    | *  |  |
| 2773714        | 2774173 | b2643 |                              |    | *  |    | *  | *  | *    | *  |  |
| 2774181        | 2774664 | b2644 |                              |    | *  | *  | *  | *  | *    | *  |  |
| 2774910        | 2775228 | b2645 |                              |    | *  | *  | *  | *  | *    | *  |  |
| 2775248        | 2775578 | b2646 | *                            |    | *  |    |    |    |      |    |  |



| <i>E coli</i> |         | Gene  | Ref | Ref | Ref | Ref | Ref | TW | TW   | TW |
|---------------|---------|-------|-----|-----|-----|-----|-----|----|------|----|
| begin         | end     |       | 16  | 35  | 34  | 14  | 49  | 99 | 97.5 | 95 |
| 2775941       | 2780651 | ypjA  | *   | *   | *   | *   |     | *  | *    | *  |
| 2780859       | 2781003 | pinH  | *   |     | *   | *   | *   | *  | *    | *  |
| 2781432       | 2782224 | ypjB  | *   | *   | *   | *   | *   | *  | *    | *  |
| 2782323       | 2782806 | ypjC  | *   |     | *   | *   | *   | *  | *    | *  |
| 2783015       | 2783135 | ygaQ  | *   |     | *   | *   | *   | *  | *    | *  |
| 2783593       | 2783767 | ygaR  | *   |     | *   | *   | *   | *  | *    | *  |
| 2784190       | 2784523 | yqaC  | *   |     | *   | *   | *   | *  | *    | *  |
| 2784541       | 2785036 | yqaD  | *   |     | *   | *   | *   | *  | *    | *  |
| 2785040       | 2785229 | b2656 | *   |     | *   |     | *   | *  | *    | *  |
| 2785400       | 2786033 | b2657 | *   |     | *   | *   |     | *  | *    | *  |
| 2786171       | 2786444 | b2658 | *   |     | *   | *   |     | *  | *    | *  |
| 2787937       | 2789271 | b2660 |     |     |     |     | *   | *  | *    | *  |
| 2789294       | 2790742 | b2661 |     |     |     |     | *   | *  | *    | *  |
| 2790756       | 2792036 | b2662 |     |     |     |     | *   | *  | *    | *  |
| 2792274       | 2793674 | b2663 |     |     |     |     |     | *  | *    | *  |
| 2795541       | 2796065 | ygaP  | *   |     | *   |     |     |    |      |    |
| 2797444       | 2797789 | ygaC  |     |     | *   |     |     |    |      |    |
| 2802836       | 2804038 | proV  |     | *   |     |     |     |    |      |    |
| 2807638       | 2808375 | b2682 |     | *   |     |     |     |    |      |    |
| 2828572       | 2829085 | ygaA  |     |     | *   |     |     |    |      |    |
| 2831935       | 2833068 | b2711 |     |     |     |     |     |    |      | *  |
| 2833196       | 2835448 | b2712 |     |     |     |     |     |    |      | *  |
| 2841466       | 2842233 | hycG  | *   |     |     |     |     |    |      | *  |
| 2842785       | 2844494 | hycE  | *   |     |     |     | *   | *  | *    | *  |
| 2844512       | 2845435 | hycD  | *   |     |     |     | *   | *  | *    | *  |
| 2845438       | 2847264 | hycC  | *   |     |     |     | *   | *  | *    | *  |
| 2847261       | 2847872 | hycB  | *   |     |     |     | *   | *  | *    | *  |
| 2847997       | 2848458 | b2725 |     |     |     |     |     |    |      | *  |
| 2857558       | 2858215 | b2734 |     |     | *   | *   |     |    |      |    |
| 2858490       | 2859287 | ygbI  |     | *   |     |     |     |    |      |    |
| 2862259       | 2863035 | ygbM  |     | *   | *   |     |     |    |      |    |
| 2865637       | 2866776 | nlpD  |     | *   |     | *   |     |    |      |    |
| 2874604       | 2875641 | iap   |     | *   |     |     |     |    |      |    |
| 2876366       | 2876717 | ygbF  |     |     | *   | *   | *   |    |      |    |
| 2876652       | 2877570 | ygbT  |     | *   | *   | *   | *   |    |      |    |
| 2877585       | 2878185 | ygcH  | *   |     | *   | *   | *   | *  | *    | *  |
| 2878171       | 2878852 | ygcI  | *   |     | *   | *   | *   | *  | *    | *  |
| 2878848       | 2879940 | ygcJ  | *   | *   | *   |     | *   | *  | *    | *  |
| 2879952       | 2880435 | ygcK  | *   |     | *   | *   | *   | *  | *    | *  |
| 2880427       | 2881936 | ygcL  | *   | *   | *   | *   | *   | *  | *    | *  |
| 2882350       | 2885017 | ygcB  | *   | *   | *   | *   | *   | *  | *    | *  |
| 2890011       | 2890377 | b2765 |     |     | *   |     |     |    |      |    |
| 2890424       | 2891726 | b2766 |     |     | *   |     |     |    |      |    |
| 2891680       | 2891977 | b2767 |     |     | *   |     |     |    |      |    |
| 2891993       | 2892569 | b2768 |     |     | *   |     |     |    |      |    |
| 2892716       | 2893610 | b2769 |     |     | *   |     |     |    |      |    |
| 2893643       | 2894360 | b2770 |     |     | *   |     |     |    |      |    |
| 2894331       | 2895741 | b2771 |     |     | *   |     |     |    |      |    |
| 2895762       | 2896557 | b2772 |     |     | *   |     |     |    |      |    |
| 2896559       | 2896925 | b2773 |     |     | *   |     |     |    |      |    |

| <i>E coli</i> |         | Gene     | Ref Ref Ref Ref Ref TW TW TW |    |    |    |    |    |      |    |  |
|---------------|---------|----------|------------------------------|----|----|----|----|----|------|----|--|
| begin         | end     |          | 16                           | 35 | 34 | 14 | 49 | 99 | 97.5 | 95 |  |
| 2896933       | 2897215 | b2774    |                              |    | *  |    |    |    |      |    |  |
| 2897284       | 2898145 | ygcW     |                              | *  | *  |    |    |    |      |    |  |
| 2898388       | 2898997 | b2775    |                              |    | *  |    |    |    |      | *  |  |
| 2898920       | 2899667 | b2776    |                              |    | *  |    |    | *  | *    | *  |  |
| 2899693       | 2901172 | ygcE     |                              |    | *  |    | *  | *  | *    | *  |  |
| 2902545       | 2903217 | b2777    |                              |    | *  |    | *  | *  | *    | *  |  |
| 2903440       | 2904382 | ygcG     | *                            | *  | *  | *  | *  | *  | *    | *  |  |
| 2908554       | 2908890 | chpA     | *                            |    | *  | *  | *  |    |      |    |  |
| 2908889       | 2909138 | chpR     |                              |    | *  |    |    |    |      |    |  |
| 2926251       | 2927540 | sdaC     |                              | *  |    |    |    |    |      |    |  |
| 2928987       | 2929832 | exo      |                              | *  |    |    |    |    |      |    |  |
| 2931063       | 2931710 | fucA     |                              |    |    | *  |    |    |      |    |  |
| 2932257       | 2933573 | fucP     |                              | *  |    | *  |    |    |      |    |  |
| 2935460       | 2936908 | fucK     |                              | *  |    |    |    |    |      |    |  |
| 2939672       | 2940589 | gcvA     |                              | *  |    |    |    |    |      |    |  |
| 2960463       | 2960786 | ppdC     |                              |    |    | *  |    |    |      |    |  |
| 2961175       | 2961738 | ppdB     |                              | *  |    |    |    |    |      |    |  |
| 2969069       | 2969288 | b2833    |                              |    | *  |    |    |    |      |    |  |
| 2981310       | 2982146 | kduI     |                              | *  |    |    |    |    |      |    |  |
| 2982433       | 2983617 | yqeF     |                              | *  |    |    | *  | *  | *    | *  |  |
| 2983869       | 2985098 | b2845    | *                            | *  | *  | *  | *  | *  | *    | *  |  |
| 2985498       | 2986190 | yqeH     | *                            |    | *  | *  | *  | *  | *    | *  |  |
| 2986524       | 2987333 | yqeI     | *                            | *  | *  | *  | *  | *  | *    | *  |  |
| 2987314       | 2987808 | yqeJ     | *                            |    | *  | *  | *  | *  | *    | *  |  |
| 2987957       | 2988394 | yqeK     | *                            |    | *  | *  | *  | *  | *    | *  |  |
| 2988576       | 2989022 | ygeF     | *                            |    | *  | *  | *  | *  | *    | *  |  |
| 2989290       | 2989781 | ygeG     | *                            |    | *  | *  | *  | *  | *    | *  |  |
| 2990116       | 2991492 | ygeH     | *                            | *  | *  | *  | *  | *  | *    | *  |  |
| 2991660       | 2991878 | ygeI     | *                            |    | *  | *  | *  | *  | *    | *  |  |
| 2992021       | 2992437 | pbl      | *                            |    | *  | *  | *  | *  | *    | *  |  |
| 2992482       | 2992928 | ygeK     | *                            |    | *  | *  | *  | *  | *    | *  |  |
| 2992959       | 2993114 | b2856    | *                            |    | *  | *  | *  | *  | *    | *  |  |
| 2993336       | 2993767 | b2857    | *                            |    | *  | *  | *  | *  | *    | *  |  |
| 2993770       | 2994042 | ygeN     | *                            |    | *  | *  | *  | *  | *    | *  |  |
| 2993984       | 2994409 | ygeO     | *                            |    | *  | *  | *  | *  | *    | *  |  |
| 2994394       | 2995299 | yi224IS2 |                              | *  | *  |    | *  | *  | *    | *  |  |
| 2995489       | 2995789 | ygeP     |                              |    | *  |    | *  | *  | *    | *  |  |
| 2995711       | 2996010 | IS2      | *                            |    | *  | *  | *  | *  | *    | *  |  |
| 2996056       | 2996892 | ygeQ     | *                            | *  | *  | *  | *  | *  | *    | *  |  |
| 2997158       | 2997937 | glyU     | *                            | *  |    | *  |    |    |      |    |  |
| 2998145       | 3000404 | b2866    |                              |    | *  |    |    |    |      |    |  |
| 3000414       | 3001293 | b2867    |                              |    | *  |    |    |    |      |    |  |
| 3001289       | 3001769 | b2868    |                              |    | *  |    |    |    |      |    |  |
| 3001808       | 3003587 | ygeV     |                              | *  | *  | *  |    |    |      |    |  |
| 3004133       | 3005225 | b2870    |                              |    | *  |    |    |    |      |    |  |
| 3005308       | 3006505 | b2871    |                              |    | *  |    |    |    |      |    |  |
| 3006562       | 3007774 | b2872    |                              |    | *  |    |    |    |      |    |  |
| 3007814       | 3009212 | b2873    |                              |    | *  |    |    |    |      |    |  |
| 3009259       | 3010192 | b2874    |                              |    | *  |    |    |    |      |    |  |
| 3010412       | 3012038 | b2875    |                              |    | *  |    |    |    |      |    |  |

| <i>E coli</i> |         | Gene        | Ref | Ref | Ref | Ref | Ref | TW | TW   | TW |
|---------------|---------|-------------|-----|-----|-----|-----|-----|----|------|----|
| begin         | end     |             | 16  | 35  | 34  | 14  | 49  | 99 | 97.5 | 95 |
| 3012085       | 3012793 | b2876       |     | *   | *   | *   |     |    |      |    |
| 3012958       | 3013537 | ygfJ        |     |     | *   | *   | *   |    |      |    |
| 3013858       | 3016957 | b2878       |     |     | *   |     |     |    |      |    |
| 3016893       | 3018288 | b2879       |     |     | *   |     |     |    |      |    |
| 3018338       | 3019118 | b2880       |     |     | *   |     |     |    |      |    |
| 3019114       | 3021985 | b2881       |     |     | *   |     |     |    |      |    |
| 3022092       | 3023550 | ygfO        |     | *   | *   |     |     |    |      |    |
| 3023564       | 3024884 | b2883       |     |     | *   |     |     |    |      |    |
| 3025455       | 3026286 | b2885       |     |     | *   |     |     |    |      |    |
| 3026321       | 3026813 | b2886       |     |     | *   |     |     |    |      |    |
| 3026809       | 3028744 | ygfT        |     | *   | *   |     |     |    |      |    |
| 3029095       | 3030613 | ygfU        |     | *   | *   |     |     |    |      |    |
| 3031677       | 3033194 | lysS        |     | *   |     |     |     |    |      |    |
| 3033204       | 3034302 | prfB        |     | *   |     |     |     | *  |      |    |
| 3054261       | 3054809 | ygfA        |     | *   |     |     |     |    |      |    |
| 3057178       | 3057409 | b2915       |     |     | *   | *   |     |    |      |    |
| 3058647       | 3060792 | sbm         |     |     | *   |     |     |    |      |    |
| 3060784       | 3061780 | ygfD        |     |     | *   |     |     |    |      |    |
| 3061748       | 3062576 | b2919       |     |     | *   |     |     |    |      |    |
| 3062599       | 3064078 | b2920       |     |     | *   |     |     |    |      |    |
| 3064074       | 3064986 | ygfI        |     | *   | *   |     |     |    |      |    |
| 3066967       | 3067827 | yggB        |     | *   |     |     |     |    |      |    |
| 3071996       | 3072709 | yggC        |     | *   | *   |     |     |    |      |    |
| 3072483       | 3072993 | yggD        |     |     | *   |     |     |    |      |    |
| 3073014       | 3073980 | yggF        |     |     | *   |     |     |    |      |    |
| 3073976       | 3074966 | b2931       |     |     | *   |     |     |    |      |    |
| 3074896       | 3075253 | b2932       |     |     | *   | *   |     |    |      |    |
| 3075267       | 3076656 | cmtA        |     |     | *   |     |     |    |      |    |
| 3076683       | 3077127 | cmtB        | *   |     | *   |     |     | *  |      |    |
| 3079806       | 3080690 | yggG        |     | *   |     |     |     |    |      |    |
| 3080896       | 3081816 | speB        |     | *   |     |     |     |    |      |    |
| 3083721       | 3083868 | yqgB        |     |     | *   | *   | *   |    |      |    |
| 3083988       | 3084204 | yqgC        |     |     | *   | *   | *   |    |      |    |
| 3084200       | 3084452 | yqgD        |     |     | *   | *   |     |    |      |    |
| 3096577       | 3097584 | yggM        |     | *   |     |     |     |    |      |    |
| 3108389       | 3108926 | b2968       |     |     | *   |     |     |    |      |    |
| 3108927       | 3109788 | b2969       |     |     | *   |     |     |    |      |    |
| 3109853       | 3110720 | b2970       |     |     | *   |     |     |    |      |    |
| 3110866       | 3111277 | yghG        |     |     | *   | *   | *   |    |      |    |
| 3111342       | 3112275 | b2972       |     | *   | *   | *   |     |    |      |    |
| 3112349       | 3114896 | b2973       |     |     | *   |     |     |    |      |    |
| 3114883       | 3116911 | b2974       |     |     | *   |     |     |    |      |    |
| 3117395       | 3119078 | b2975       |     |     | *   |     |     |    |      |    |
| 3119432       | 3121604 | glcB        |     |     | *   |     |     |    |      |    |
| 3121625       | 3122030 | glcG        |     |     | *   |     |     |    |      |    |
| 3122034       | 3124320 | glcE & glcF |     |     | *   |     |     |    |      |    |
| 3124319       | 3125819 | glcD        |     |     | *   |     |     |    |      |    |
| 3126069       | 3126834 | glcC        |     |     | *   |     |     |    |      |    |
| 3126840       | 3128013 | b2981       |     |     | *   |     |     |    |      |    |
| 3127975       | 3128992 | IS5L        |     |     | *   |     |     |    |      |    |

| <i>E coli</i> |         | Gene  | Ref | Ref | Ref | Ref | Ref | TW | TW   | TW |
|---------------|---------|-------|-----|-----|-----|-----|-----|----|------|----|
| begin         | end     |       | 16  | 35  | 34  | 14  | 49  | 99 | 97.5 | 95 |
| 3129138       | 3130116 | b2983 |     |     | *   |     |     |    |      |    |
| 3130251       | 3131010 | b2984 |     |     | *   |     |     |    |      |    |
| 3131041       | 3131755 | yghS  |     | *   | *   |     |     |    |      |    |
| 3131928       | 3132621 | yghT  |     |     | *   |     | *   |    |      |    |
| 3148737       | 3148982 | b3004 |     |     |     | *   |     |    |      |    |
| 3149771       | 3149927 | b3007 |     |     | *   | *   |     |    |      |    |
| 3155442       | 3155736 | yqhG  |     | *   | *   |     |     |    |      |    |
| 3155768       | 3156371 | b3013 |     |     | *   |     |     |    |      |    |
| 3156421       | 3156679 | b3014 |     |     | *   |     |     |    |      |    |
| 3163904       | 3165512 | b3020 |     |     | *   |     |     |    |      |    |
| 3165644       | 3166040 | ygiT  |     |     | *   | *   | *   |    |      |    |
| 3166041       | 3166338 | ygiU  |     |     | *   | *   | *   |    |      |    |
| 3166542       | 3167025 | b3023 |     |     | *   |     |     |    |      |    |
| 3169672       | 3170005 | ygiZ  |     |     | *   | *   | *   |    |      |    |
| 3174874       | 3175296 | yqiB  |     |     |     | *   |     |    |      |    |
| 3177612       | 3177872 | ygiA  |     |     |     | *   |     |    |      |    |
| 3183208       | 3183760 | ygiL  | *   |     | *   |     |     | *  | *    |    |
| 3183981       | 3184347 | IS2   |     |     | *   |     |     | *  | *    |    |
| 3184304       | 3185210 | IS2   |     | *   | *   |     | *   | *  | *    |    |
| 3185194       | 3187660 | yqiG  | *   | *   | *   | *   | *   | *  | *    | *  |
| 3187666       | 3188425 | yqiH  | *   | *   | *   | *   | *   | *  | *    | *  |
| 3188426       | 3189491 | yqiI  | *   | *   | *   | *   | *   | *  | *    | *  |
| 3189533       | 3189734 | glgS  | *   |     | *   |     | *   | *  | *    | *  |
| 3190002       | 3190632 | yqiJ  | *   |     | *   | *   | *   | *  | *    | *  |
| 3190880       | 3192541 | b3051 |     |     |     |     |     | *  | *    |    |
| 3194500       | 3197000 | NF    |     |     |     |     |     |    |      |    |
| 3202743       | 3203676 | ygiP  |     | *   | *   |     |     |    |      |    |
| 3218334       | 3218667 | ygjH  |     |     | *   |     |     |    |      |    |
| 3218885       | 3219869 | ebgR  |     |     | *   |     |     |    |      |    |
| 3220016       | 3223145 | ebgA  |     |     | *   |     |     |    |      |    |
| 3223141       | 3223591 | ebgC  |     |     | *   |     |     |    |      |    |
| 3223653       | 3225087 | ygjI  |     |     | *   |     |     |    |      |    |
| 3225220       | 3226291 | ygjJ  |     |     | *   |     |     |    |      |    |
| 3226307       | 3228659 | ygjK  |     |     | *   |     |     |    |      |    |
| 3231145       | 3231562 | ygjM  |     |     | *   |     |     |    |      |    |
| 3231558       | 3231873 | ygjN  |     |     | *   | *   | *   |    |      |    |
| 3250551       | 3250907 | yhaI  |     |     |     | *   |     |    |      |    |
| 3251959       | 3252660 | yhaK  |     | *   |     |     |     |    |      |    |
| 3260093       | 3261313 | tdcD  |     | *   |     |     |     |    |      |    |
| 3261106       | 3262438 | tdcC  |     |     | *   |     | *   | *  | *    | *  |
| 3262459       | 3263449 | tdcB  | *   |     | *   |     | *   | *  | *    | *  |
| 3263547       | 3264486 | tdcA  | *   |     | *   | *   | *   | *  | *    | *  |
| 3264674       | 3265019 | tdcR  |     |     | *   | *   | *   | *  | *    | *  |
| 3265253       | 3265814 | yhaB  |     |     | *   | *   | *   | *  | *    | *  |
| 3265835       | 3267023 | yhaC  | *   |     | *   | *   | *   | *  | *    | *  |
| 3267083       | 3267248 | b3122 |     |     | *   | *   | *   | *  | *    | *  |
| 3274421       | 3274757 | sohA  |     |     | *   | *   |     |    |      |    |
| 3274756       | 3275221 | yhaV  |     |     | *   | *   | *   |    |      |    |
| 3275275       | 3276085 | agaR  |     |     | *   |     |     |    |      |    |
| 3276333       | 3277614 | agaZ  |     |     | *   |     |     |    |      |    |

| <i>E coli</i> |         | Gene     | Ref | Ref | Ref | Ref | Ref | TW | TW   | TW |
|---------------|---------|----------|-----|-----|-----|-----|-----|----|------|----|
| begin         | end     |          | 16  | 35  | 34  | 14  | 49  | 99 | 97.5 | 95 |
| 3277600       | 3278110 | agaV     |     |     | *   |     |     |    |      |    |
| 3278120       | 3278522 | agaW     |     |     | *   |     |     |    |      |    |
| 3278541       | 3279033 | agaA     |     |     | *   |     |     |    |      |    |
| 3279394       | 3280549 | agaS     |     |     | *   |     |     |    |      |    |
| 3281588       | 3282065 | agaB     |     |     | *   |     |     |    |      |    |
| 3282103       | 3282907 | agaC     |     |     | *   |     |     |    |      |    |
| 3282896       | 3283688 | agaD     |     |     | *   |     |     |    |      | *  |
| 3283688       | 3284444 | agaI     | *   |     | *   |     |     |    |      | *  |
| 3284844       | 3285429 | yraH     |     |     | *   |     |     |    |      | *  |
| 3285508       | 3286204 | yraI     |     |     | *   | *   | *   |    | *    | *  |
| 3286232       | 3288749 | yraJ     | *   | *   | *   |     |     | *  | *    | *  |
| 3288759       | 3289851 | yraK     |     |     | *   | *   | *   |    |      |    |
| 3293035       | 3293430 | yraN     |     |     |     | *   |     |    |      |    |
| 3303612       | 3305552 | b3162    |     |     |     |     |     |    |      | *  |
| 3305681       | 3306565 | b3163    |     |     |     |     |     |    |      | *  |
| 3310418       | 3310819 | b3167    |     |     |     |     |     | *  | *    | *  |
| 3310983       | 3313655 | b3168    |     |     |     |     | *   | *  | *    | *  |
| 3313680       | 3315167 | b3169    |     |     |     |     |     | *  | *    | *  |
| 3305681       | 3306565 | yhbM     | *   |     |     |     |     |    |      |    |
| 3317629       | 3319272 | yhbX     | *   | *   | *   | *   |     |    |      |    |
| 3334190       | 3334459 | yrbA     |     |     |     | *   |     |    |      |    |
| 3346722       | 3347450 | yrbMmtgA |     | *   |     |     |     |    |      |    |
| 3353500       | 3356500 | NF       |     |     |     |     |     |    |      |    |
| 3358811       | 3359575 | gltF     | *   | *   | *   | *   | *   | *  | *    | *  |
| 3359747       | 3360421 | yhcA     | *   |     | *   | *   | *   | *  | *    | *  |
| 3360442       | 3362823 | yhcD     | *   | *   | *   | *   | *   | *  | *    | *  |
| 3362820       | 3363299 | yhcE     | *   |     | *   | *   | *   |    |      | *  |
| 3363113       | 3364130 | IS5R     |     |     | *   |     |     |    |      |    |
| 3364561       | 3365277 | yhcF     | *   | *   | *   | *   | *   |    |      |    |
| 3365462       | 3366589 | yhcG     |     | *   |     | *   |     |    |      |    |
| 3372280       | 3373648 | yhcL     |     |     | *   |     |     |    |      |    |
| 3382898       | 3383213 | b3238    |     |     | *   |     |     |    |      |    |
| 3383268       | 3383541 | b3239    |     |     | *   |     |     |    |      |    |
| 3386769       | 3387041 | yhcR     |     |     |     | *   |     |    |      |    |
| 3401927       | 3402029 | b3254    |     |     | *   | *   |     |    |      |    |
| 3407917       | 3408882 | yhdG     | *   |     |     | *   |     |    |      |    |
| 3409284       | 3410174 | yhdJ     | *   |     |     |     |     |    |      |    |
| 3410033       | 3410213 | yhdU     |     |     | *   |     | *   |    |      |    |
| 3410440       | 3411102 | envR     |     |     |     | *   |     |    |      |    |
| 3416561       | 3417479 | yhdW     | *   | *   |     |     |     |    |      |    |
| 3417528       | 3418635 | yhdX     | *   | *   |     |     |     |    |      |    |
| 3418733       | 3419840 | yhdY     |     |     | *   |     |     |    |      |    |
| 3419847       | 3420606 | yhdZ     | *   | *   | *   |     |     |    |      |    |
| 3426657       | 3427427 | yrdA     | *   |     |     | *   |     |    |      |    |
| 3427403       | 3427660 | yrdB     |     |     |     | *   |     |    |      |    |
| 3427657       | 3428475 | aroE     | *   |     |     |     |     |    |      |    |
| 3429057       | 3429566 | yrdD     |     |     |     | *   |     |    |      |    |
| 3430212       | 3430974 | b3286    |     |     | *   |     |     |    |      |    |
| 3430074       | 3430382 | smf_2    |     |     |     | *   | *   |    |      |    |
| 3430436       | 3431197 | smf_1    | *   | *   | *   | *   |     |    |      |    |

| <i>E coli</i> |         | Gene  | Ref | Ref | Ref | Ref | Ref | TW | TW   | TW |
|---------------|---------|-------|-----|-----|-----|-----|-----|----|------|----|
| begin         | end     |       | 16  | 35  | 34  | 14  | 49  | 99 | 97.5 | 95 |
| 3431103       | 3431613 | def   |     |     | *   |     |     |    |      |    |
| 3432844       | 3434133 | sun   |     | *   |     |     |     |    |      |    |
| 3442180       | 3442359 | b3302 |     |     |     |     |     |    |      | *  |
| 3442363       | 3442866 | b3303 |     |     |     |     |     |    |      | *  |
| 3442881       | 3443234 | b3304 |     |     |     |     |     |    |      | *  |
| 3443244       | 3443777 | b3305 |     |     |     |     |     | *  |      | *  |
| 3443790       | 3444182 | b3306 |     |     |     |     |     | *  |      | *  |
| 3444216       | 3444521 | b3307 |     |     |     |     |     | *  |      | *  |
| 3444536       | 3445075 | b3308 |     |     |     |     |     | *  |      | *  |
| 3445090       | 3445404 | b3309 |     |     |     |     | *   | *  |      | *  |
| 3445415       | 3445786 | b3310 |     |     |     |     | *   | *  |      | *  |
| 3445951       | 3446205 | b3311 |     |     |     |     | *   | *  |      | *  |
| 3446205       | 3446396 | b3312 |     |     |     |     | *   | *  |      | *  |
| 3446396       | 3446806 | b3313 |     |     |     |     | *   | *  |      | *  |
| 3446819       | 3447520 | b3314 |     |     |     |     | *   | *  |      | *  |
| 3447538       | 3447870 | b3315 |     |     |     |     | *   | *  |      | *  |
| 3447885       | 3448163 | b3316 |     |     |     |     | *   | *  |      | *  |
| 3448180       | 3449001 | rplB  | *   |     |     |     | *   | *  | *    | *  |
| 3449019       | 3449321 | b3318 |     |     |     |     | *   | *  |      | *  |
| 3449318       | 3449923 | b3319 |     |     |     |     |     | *  |      | *  |
| 3449934       | 3450563 | b3320 |     |     |     |     |     | *  |      | *  |
| 3450922       | 3451342 | pinO  |     |     | *   | *   |     |    |      | *  |
| 3451343       | 3452813 | yheD  | *   | *   | *   | *   |     |    |      |    |
| 3452992       | 3453808 | yheE  | *   | *   | *   | *   |     |    |      |    |
| 3453779       | 3455744 | yheF  | *   | *   |     |     |     |    |      |    |
| 3455753       | 3457235 | yheG  | *   | *   |     |     |     |    |      |    |
| 3457231       | 3458428 | hofF  |     |     | *   |     |     |    |      |    |
| 3458437       | 3458875 | hofG  |     |     | *   |     |     |    |      |    |
| 3458882       | 3459392 | hofH  |     |     | *   |     |     |    |      |    |
| 3459349       | 3459766 | yheH  |     |     | *   |     |     |    |      |    |
| 3459758       | 3460346 | yheI  |     |     | *   |     |     |    |      |    |
| 3460338       | 3461322 | yheJ  | *   | *   | *   |     |     |    |      |    |
| 3461333       | 3462500 | yheK  | *   | *   | *   |     |     |    |      |    |
| 3462472       | 3462958 | pshM  |     |     | *   | *   |     |    |      |    |
| 3462957       | 3463635 | hofD  |     |     | *   | *   |     |    |      |    |
| 3464434       | 3464628 | yheA  |     |     |     | *   |     |    |      |    |
| 3464574       | 3467268 | yheB  | *   | *   |     |     |     |    |      | *  |
| 3467782       | 3468966 | b3339 |     |     |     |     | *   | *  | *    | *  |
| 3469037       | 3471151 | b3340 |     |     |     |     | *   | *  | *    | *  |
| 3471179       | 3471718 | b3341 |     |     |     |     | *   | *  | *    | *  |
| 3489475       | 3489642 | yhfG  |     |     |     |     | *   |    |      |    |
| 3494188       | 3494514 | nirD  | *   |     |     |     |     |    |      |    |
| 3497272       | 3498661 | yhfM  |     |     | *   |     |     |    |      |    |
| 3498660       | 3499704 | yhfN  |     |     | *   |     |     |    |      |    |
| 3499666       | 3500116 | yhfO  |     |     | *   |     |     |    |      |    |
| 3500180       | 3500579 | yhfP  |     |     | *   |     |     |    |      |    |
| 3500582       | 3501368 | yhfQ  |     |     | *   |     |     |    |      |    |
| 3501401       | 3502199 | yhfR  |     |     | *   |     |     |    |      |    |
| 3502350       | 3503436 | yhfS  |     |     | *   |     |     |    |      |    |
| 3503447       | 3504719 | yhfT  |     |     | *   |     |     |    |      |    |



| <i>E coli</i> |         | Gene  | Ref | Ref | Ref | Ref | Ref | TW | TW   | TW |
|---------------|---------|-------|-----|-----|-----|-----|-----|----|------|----|
| begin         | end     |       | 16  | 35  | 34  | 14  | 49  | 99 | 97.5 | 95 |
| 3637015       | 3637350 | yhiO  |     |     | *   |     |     | *  | *    | *  |
| 3648691       | 3649474 | yhiS  | *   | *   | *   | *   | *   | *  | *    | *  |
| 3649582       | 3650599 | IS5T  |     |     | *   |     |     | *  | *    | *  |
| 3651328       | 3651928 | slp   | *   |     | *   |     |     | *  | *    | *  |
| 3652083       | 3652614 | yhiF  | *   |     | *   | *   |     | *  | *    | *  |
| 3652655       | 3653303 | yhiD  | *   |     | *   |     |     | *  | *    | *  |
| 3653366       | 3653705 | hdeB  | *   |     | *   |     |     | *  | *    | *  |
| 3653808       | 3654141 | hdeA  | *   |     | *   |     |     | *  | *    | *  |
| 3654395       | 3654968 | hdeD  |     |     | *   |     |     | *  | *    | *  |
| 3655766       | 3656294 | yhiE  | *   |     | *   | *   | *   | *  | *    | *  |
| 3661290       | 3662019 | yhiW  |     | *   | *   | *   |     |    |      |    |
| 3662386       | 3663211 | yhiX  | *   | *   | *   | *   | *   | *  | *    | *  |
| 3663580       | 3664981 | gadA  |     |     | *   |     |     | *  | *    | *  |
| 3663810       | 3665210 | b3517 |     |     |     |     |     | *  | *    | *  |
| 3693391       | 3693580 | b3535 |     |     | *   |     |     |    |      |    |
| 3694087       | 3695658 | yhjS  |     | *   |     |     |     |    |      |    |
| 3698192       | 3699463 | yhjV  |     | *   |     |     |     |    |      |    |
| 3681260       | 3683215 | b3529 |     |     |     |     |     |    | *    | *  |
| 3683330       | 3686830 | b3530 |     |     |     |     |     | *  | *    | *  |
| 3686784       | 3687890 | b3531 |     |     |     |     |     | *  | *    | *  |
| 3710721       | 3711284 | tag   |     | *   |     |     |     |    |      |    |
| 3715963       | 3716793 | b3554 |     |     |     |     |     |    | *    | *  |
| 3717107       | 3717397 | yiaG  |     |     | *   |     |     |    | *    | *  |
| 3717678       | 3717890 | b3556 |     |     |     |     |     |    | *    | *  |
| 3718072       | 3718594 | IS150 |     |     | *   | *   |     |    | *    | *  |
| 3718590       | 3719442 | t150  | *   | *   | *   | *   | *   |    | *    | *  |
| 3723516       | 3724511 | yiaH  |     | *   |     |     |     |    |      |    |
| 3724553       | 3724993 | yiaA  | *   |     | *   |     |     |    |      |    |
| 3725036       | 3725389 | yiaB  | *   |     | *   |     |     |    |      |    |
| 3725546       | 3727000 | xylB  |     | *   |     |     |     |    |      |    |
| 3728760       | 3729752 | xylF  |     | *   |     |     |     |    |      |    |
| 3729830       | 3731371 | xylG  |     | *   |     |     |     |    |      |    |
| 3732608       | 3733786 | xylR  |     | *   |     |     |     |    |      |    |
| 3733982       | 3734806 | bax   |     | *   |     | *   |     |    |      |    |
| 3735126       | 3737156 | malS  |     | *   |     |     |     |    |      |    |
| 3741136       | 3741604 | yiaL  |     |     | *   | *   |     |    |      |    |
| 3741721       | 3742195 | yiaM  | *   |     | *   | *   |     |    |      |    |
| 3748522       | 3749263 | yiaT  |     | *   | *   |     |     |    |      |    |
| 3749386       | 3750361 | yiaU  |     | *   | *   |     |     |    |      |    |
| 3750357       | 3751494 | yiaV  |     |     | *   |     |     |    |      |    |
| 3751499       | 3751823 | yiaW  |     |     | *   |     |     |    |      |    |
| 3754070       | 3755219 | yiaY  |     |     | *   |     |     |    |      |    |
| 3757485       | 3758876 | b3591 |     |     |     |     | *   | *  | *    | *  |
| 3758974       | 3759582 | b3592 |     |     |     |     | *   | *  | *    | *  |
| 3759576       | 3763710 | rhsA  |     | *   | *   |     | *   | *  | *    | *  |
| 3763730       | 3764573 | yibA  | *   | *   | *   | *   | *   | *  | *    | *  |
| 3764614       | 3765316 | yibJ  |     | *   | *   |     | *   | *  | *    | *  |
| 3765570       | 3766032 | yibG  |     | *   | *   | *   | *   | *  | *    | *  |
| 3767870       | 3769006 | b3597 |     |     |     |     | *   | *  | *    | *  |
| 3790217       | 3791090 | b3618 |     | *   |     |     |     |    |      |    |



| <i>E coli</i> |         | Gene      | Ref | Ref | Ref | Ref | Ref | TW | TW   | TW |
|---------------|---------|-----------|-----|-----|-----|-----|-----|----|------|----|
| begin         | end     |           | 16  | 35  | 34  | 14  | 49  | 99 | 97.5 | 95 |
| 3786674       | 3787708 | yibD      |     | *   |     |     |     |    |      |    |
| 3790453       | 3791325 | htrL      |     | *   |     | *   | *   |    |      |    |
| 3791392       | 3792325 | rfaD      |     |     | *   |     |     | *  | *    | *  |
| 3792334       | 3793381 | rfaF      |     |     | *   |     | *   | *  | *    | *  |
| 3793384       | 3794344 | rfaC      |     | *   | *   |     | *   | *  | *    | *  |
| 3794353       | 3795613 | rfaL      | *   | *   | *   | *   | *   | *  | *    | *  |
| 3795644       | 3796718 | rfaK      | *   | *   | *   | *   | *   | *  | *    | *  |
| 3796750       | 3797602 | rfaZ      | *   | *   | *   | *   | *   | *  | *    | *  |
| 3797672       | 3798371 | rfaY      | *   |     | *   | *   | *   | *  | *    | *  |
| 3798388       | 3799405 | rfaJ      | *   | *   | *   | *   | *   | *  | *    | *  |
| 3799444       | 3800464 | rfaI      | *   | *   | *   | *   | *   | *  | *    | *  |
| 3800463       | 3801573 | rfaB      | *   | *   | *   | *   | *   | *  | *    | *  |
| 3801586       | 3802522 | rfaS      | *   | *   | *   | *   | *   | *  | *    | *  |
| 3802558       | 3803356 | rfaP      | *   | *   | *   | *   | *   | *  | *    | *  |
| 3803348       | 3804473 | rfaG      | *   | *   | *   | *   | *   | *  | *    | *  |
| 3804469       | 3805504 | rfaQ      | *   | *   | *   | *   | *   | *  | *    | *  |
| 3809518       | 3810192 | radC      |     |     |     | *   |     |    |      |    |
| 3815375       | 3816211 | dinD      |     | *   |     |     | *   |    |      |    |
| 3817115       | 3818803 | yicF      |     | *   |     |     |     |    |      |    |
| 3834580       | 3835764 | yicK      | *   |     | *   | *   |     | *  | *    |    |
| 3835875       | 3836798 | yicL      | *   |     |     |     |     | *  | *    |    |
| 3836802       | 3837620 | nlpA      | *   |     |     |     |     |    |      |    |
| 3840082       | 3841494 | yicO      | *   |     |     |     |     |    |      |    |
| 3841371       | 3843138 | yicP      |     |     | *   |     |     |    |      |    |
| 3846261       | 3847766 | b3668     |     |     |     |     |     | *  | *    |    |
| 3847763       | 3848353 | b3669     |     |     |     |     |     | *  | *    |    |
| 3848429       | 3848719 | b3670     |     |     |     |     |     | *  | *    |    |
| 3850517       | 3850615 | ivbL      |     |     |     | *   |     |    |      |    |
| 3853235       | 3853597 | yidG      |     |     |     | *   |     |    |      |    |
| 3854042       | 3854491 | yidI      |     |     |     | *   |     |    |      |    |
| 3854318       | 3855812 | yidJ      |     |     | *   |     |     |    |      |    |
| 3855808       | 3857524 | yidK      |     |     | *   |     |     |    |      |    |
| 3857660       | 3858584 | yidL      |     | *   | *   | *   |     |    |      |    |
| 3858756       | 3859395 | glvG      |     |     | *   |     |     |    |      |    |
| 3865280       | 3865687 | yidQ      |     |     |     | *   |     |    |      |    |
| 3866763       | 3867849 | yidS      |     | *   | *   |     |     |    |      |    |
| 3871224       | 3872102 | dgoKf292  |     | *   |     |     |     |    |      |    |
| 3873122       | 3873793 | yidX      |     | *   | *   | *   | *   |    |      |    |
| 3874475       | 3874883 | yidB      |     |     | *   |     |     |    |      |    |
| 3885843       | 3885918 | tnaL      |     |     | *   |     |     |    |      |    |
| 3886123       | 3887554 | tnaA      |     |     | *   |     |     |    |      |    |
| 3887644       | 3888892 | tnaB      |     | *   | *   |     |     |    |      |    |
| 3891498       | 3892259 | yieE      |     | *   |     |     |     |    |      |    |
| 3894914       | 3895382 | yieI      |     |     | *   | *   |     |    |      |    |
| 3895430       | 3896018 | yieJ      |     |     | *   | *   | *   |    |      |    |
| 3898232       | 3899848 | yieC      |     | *   |     |     |     |    |      |    |
| 3899917       | 3901329 | bglB      |     | *   |     |     |     |    |      |    |
| 3901126       | 3903004 | bglF      |     |     | *   |     |     |    |      |    |
| 3903137       | 3903974 | bglG      |     | *   | *   | *   |     |    |      |    |
| 3913181       | 3913600 | atpC=uncC |     | *   |     |     |     |    | *    |    |

| <i>E coli</i> |         | Gene     | Ref | Ref | Ref | Ref | Ref | TW | TW   | TW |
|---------------|---------|----------|-----|-----|-----|-----|-----|----|------|----|
| begin         | end     |          | 16  | 35  | 34  | 14  | 49  | 99 | 97.5 | 95 |
| 3915944       | 3917485 | atpA     | *   |     |     |     |     |    | *    | *  |
| 3919688       | 3920080 | atpI     |     |     |     | *   |     |    |      |    |
| 3936811       | 3938238 | yieOf475 | *   |     |     |     |     |    |      |    |
| 3945189       | 3945590 | pssR     |     |     |     | *   |     |    |      |    |
| 3946072       | 3947622 | yifB     | *   |     |     |     |     |    |      |    |
| 3951132       | 3952949 | b3771    |     |     |     |     |     | *  | *    |    |
| 3952952       | 3954496 | b3772    |     |     |     |     |     | *  | *    |    |
| 3954548       | 3955441 | b3773    |     |     |     |     |     | *  | *    |    |
| 3956925       | 3957207 | ppiC     |     |     | *   |     |     |    |      |    |
| 3957627       | 3957902 | b3776    |     |     |     | *   |     |    |      |    |
| 3957857       | 3958117 | yifN     |     |     |     | *   | *   |    |      |    |
| 3963846       | 3963947 | rhoL     |     |     |     | *   |     |    |      |    |
| 3975137       | 3975361 | yifM_1   |     |     |     | *   |     |    |      |    |
| 3981731       | 3983387 | aslA     |     |     | *   |     |     |    |      |    |
| 3986701       | 3987441 | hemD     | *   |     |     |     |     |    |      |    |
| 3991463       | 3991948 | b3808    |     |     |     | *   |     |    |      |    |
| 3993900       | 3994796 | b3811    |     |     |     |     |     | *  | *    |    |
| 3994796       | 3995512 | b3812    |     |     |     |     |     | *  | *    |    |
| 3995596       | 3997758 | b3813    |     |     |     |     |     | *  | *    |    |
| 3997669       | 3997969 | b3814    |     |     | *   |     |     |    |      |    |
| 3997947       | 3998433 | yigE     |     |     | *   |     |     |    |      |    |
| 3999794       | 4000175 | yigF     | *   |     | *   | *   | *   |    |      |    |
| 4000188       | 4000605 | yigG     |     |     | *   | *   | *   |    |      |    |
| 4008666       | 4009565 | yigMo299 |     | *   |     |     |     |    |      |    |
| 4012721       | 4013719 | ysgA     |     |     |     | *   |     |    |      |    |
| 4019665       | 4020006 | b3837    |     |     |     | *   |     |    |      |    |
| 4021585       | 4021926 | yigW_2   |     |     |     | *   |     |    |      |    |
| 4038929       | 4039441 | mobB     |     |     |     |     | *   |    |      |    |
| 4039996       | 4040982 | yihE     | *   |     |     |     |     |    |      |    |
| 4041737       | 4043209 | yihF     | *   | *   |     |     | *   | *  | *    |    |
| 4043250       | 4044182 | yihG     | *   |     |     | *   |     |    |      |    |
| 4058026       | 4058736 | yihL     | *   | *   |     |     |     | *  | *    |    |
| 4058744       | 4059724 | yihM     | *   | *   |     |     | *   | *  | *    |    |
| 4059826       | 4061091 | yihN     | *   | *   |     |     | *   | *  | *    |    |
| 4061182       | 4061874 | yihO     | *   | *   | *   |     | *   | *  | *    |    |
| 4061889       | 4063352 | yihO     | *   |     |     |     | *   | *  | *    |    |
| 4067055       | 4067981 | yihR     | *   |     |     |     |     |    |      |    |
| 4076584       | 4076830 | yiiE     |     |     | *   | *   |     |    |      |    |
| 4077047       | 4077290 | yiiF     |     |     | *   | *   | *   |    |      |    |
| 4084322       | 4085378 | yiiG     | *   |     | *   |     |     |    |      |    |
| 4085428       | 4087177 | frvR     |     |     | *   |     |     |    |      |    |
| 4087176       | 4088247 | frvX     |     |     | *   |     |     |    |      |    |
| 4088236       | 4089694 | frvB     |     |     | *   |     |     |    |      |    |
| 4089698       | 4090142 | frvA     |     |     | *   |     |     |    |      |    |
| 4095317       | 4096153 | rhaS     | *   |     |     |     |     |    |      |    |
| 4096137       | 4097075 | rhaR     | *   |     |     |     |     |    |      |    |
| 4099262       | 4100254 | kdgT     | *   | *   |     |     |     |    |      |    |
| 4100373       | 4101077 | kdgTyiiM | *   |     |     |     |     |    |      |    |
| 4104049       | 4104951 | yiiP     | *   |     |     |     |     |    |      |    |
| 4110281       | 4110581 | yiiS     |     |     | *   |     |     |    |      |    |



| <i>E coli</i> |         | Gene      | Ref | Ref | Ref | Ref | Ref | TW | TW   | TW |
|---------------|---------|-----------|-----|-----|-----|-----|-----|----|------|----|
| begin         | end     |           | 16  | 35  | 34  | 14  | 49  | 99 | 97.5 | 95 |
| 4289091       | 4290749 | b4074     |     |     |     |     |     |    |      | *  |
| 4296877       | 4298344 | yjcP      |     |     | *   |     |     |    |      |    |
| 4298340       | 4300251 | yjcQ      |     |     | *   |     |     |    |      |    |
| 4300391       | 4301423 | yjcR      |     |     | *   |     |     |    |      |    |
| 4301925       | 4303923 | yjcS      |     |     | *   |     |     |    |      |    |
| 4304183       | 4305113 | yjcT      |     |     | *   |     |     |    |      |    |
| 4305096       | 4305792 | yjcU      |     |     | *   |     |     |    |      |    |
| 4305802       | 4306783 | yjcV      |     |     | *   |     |     |    |      |    |
| 4306761       | 4308294 | yjcW      |     |     | *   |     |     |    |      |    |
| 4308420       | 4309356 | yjcX      |     | *   | *   |     |     |    |      |    |
| 4309414       | 4310338 | rpiR      |     | *   | *   | *   |     |    |      |    |
| 4310663       | 4311113 | rpiB      |     |     | *   |     |     |    |      |    |
| 4311123       | 4311531 | phnQ      |     |     | *   | *   | *   | *  | *    | *  |
| 4311656       | 4312415 | phnP      | *   |     | *   |     | *   | *  | *    | *  |
| 4312416       | 4312851 | phnO      | *   |     | *   |     | *   | *  | *    | *  |
| 4312837       | 4313395 | phnN      | *   |     | *   |     | *   | *  | *    | *  |
| 4313660       | 4314796 | phnM      | *   |     | *   |     | *   | *  | *    | *  |
| 4314793       | 4315473 | phnL      | *   |     | *   |     | *   | *  | *    | *  |
| 4315584       | 4316342 | phnK      | *   |     | *   |     | *   | *  | *    | *  |
| 4316339       | 4317184 | phnJ      | *   |     | *   |     | *   | *  | *    | *  |
| 4317177       | 4318241 | phnI      | *   |     | *   |     | *   | *  | *    | *  |
| 4318241       | 4318825 | phnH      | *   |     | *   |     | *   | *  | *    | *  |
| 4318822       | 4319274 | phnG      | *   |     | *   |     | *   | *  | *    | *  |
| 4319275       | 4320000 | phnF      | *   |     | *   |     | *   | *  | *    | *  |
| 4319755       | 4319977 | b4103     |     |     | *   |     | *   | *  | *    | *  |
| 4319973       | 4320594 | phnE      |     |     | *   | *   | *   | *  | *    | *  |
| 4320648       | 4321665 | phnD      |     |     | *   |     | *   | *  | *    | *  |
| 4321689       | 4322478 | phnC      |     |     | *   |     | *   | *  | *    | *  |
| 4322610       | 4323054 | phnB      |     |     | *   |     |     |    |      |    |
| 4323612       | 4323948 | phnA      |     |     | *   |     |     |    |      |    |
| 4324348       | 4326577 | yjdA      |     |     | *   |     |     |    |      |    |
| 4326606       | 4327452 | yjcZ      |     |     | *   |     |     |    |      |    |
| 4334380       | 4335142 | adiY      |     | *   | *   | *   | *   |    |      |    |
| 4340959       | 4342368 | melB      |     | *   |     |     |     |    |      |    |
| 4342141       | 4342771 | yjdF      |     |     | *   |     |     |    |      |    |
| 4347609       | 4349240 | b4125     |     |     |     |     |     |    |      | *  |
| 4349221       | 4349451 | yjdI      |     |     |     | *   |     |    |      |    |
| 4349297       | 4349570 | yjdJ      |     |     | *   |     |     |    |      | *  |
| 4349796       | 4350093 | yjdK      |     |     | *   | *   | *   | *  |      |    |
| 4350778       | 4352295 | lysS-like |     | *   |     |     |     |    |      |    |
| 4354048       | 4356195 | b4131     |     |     |     |     | *   | *  | *    | *  |
| 4356275       | 4357609 | b4132     |     |     |     |     | *   | *  | *    | *  |
| 4357974       | 4359512 | cadC      | *   | *   | *   | *   | *   | *  | *    | *  |
| 4370943       | 4371812 | yjeJ      | *   |     |     |     |     |    |      |    |
| 4374303       | 4374770 | sugE      |     |     |     | *   |     |    |      |    |
| 4375389       | 4376522 | ampC      | *   | *   |     |     |     |    |      |    |
| 4381375       | 4382919 | yjeM      | *   |     |     |     |     |    |      |    |
| 4382605       | 4382920 | yjeN      |     |     | *   | *   |     |    |      |    |
| 4382916       | 4383231 | yjeO      |     |     | *   |     |     |    |      |    |
| 4386970       | 4387938 | psd       | *   |     |     |     |     |    |      |    |



| <i>E coli</i> |         | Gene   | Ref Ref Ref Ref Ref TW TW TW |    |    |    |    |    |      |    |  |
|---------------|---------|--------|------------------------------|----|----|----|----|----|------|----|--|
| begin         | end     |        | 16                           | 35 | 34 | 14 | 49 | 99 | 97.5 | 95 |  |
| 4504113       | 4504317 | yjhE   | *                            |    | *  | *  |    | *  | *    | *  |  |
| 4504368       | 4504671 | IS911  | *                            |    | *  |    |    | *  | *    | *  |  |
| 4504673       | 4505825 | IS30D  | *                            | *  | *  | *  |    | *  | *    | *  |  |
| 4506165       | 4506762 | b4285  |                              |    | *  |    |    |    |      | *  |  |
| 4506927       | 4507341 | b4286  |                              |    | *  | *  |    |    |      |    |  |
| 4507897       | 4508665 | fecE   | *                            | *  | *  |    |    | *  | *    | *  |  |
| 4508665       | 4509622 | fecD   | *                            |    | *  |    |    | *  | *    | *  |  |
| 4509618       | 4510617 | fecC   | *                            |    | *  |    |    | *  | *    | *  |  |
| 4510613       | 4511522 | fecB   | *                            |    | *  |    |    | *  | *    | *  |  |
| 4511560       | 4513885 | fecA   | *                            |    | *  |    |    | *  | *    | *  |  |
| 4513971       | 4514925 | fecR   | *                            |    | *  |    |    | *  | *    | *  |  |
| 4514921       | 4515443 | fecI   |                              |    | *  |    |    |    |      |    |  |
| 4515734       | 4516010 | IS1F   |                              |    | *  | *  |    |    |      |    |  |
| 4516545       | 4517346 | yjhU   |                              | *  | *  |    |    |    |      |    |  |
| 4518059       | 4519226 | yjhF   |                              |    | *  |    |    |    |      |    |  |
| 4519332       | 4521300 | yjhG   |                              |    | *  |    |    |    |      |    |  |
| 4521310       | 4522270 | yjhH   |                              |    | *  |    |    |    |      |    |  |
| 4522220       | 4523009 | yjhI   |                              | *  | *  | *  | *  |    |      |    |  |
| 4523674       | 4524456 | sgcR   |                              | *  |    |    |    |    |      |    |  |
| 4524473       | 4525105 | sgcE   |                              |    |    | *  |    |    |      |    |  |
| 4528098       | 4529249 | sgcX   |                              | *  |    |    |    |    |      |    |  |
| 4532583       | 4533599 | yjhR   | *                            | *  | *  | *  | *  | *  | *    | *  |  |
| 4534182       | 4535162 | yjhS   | *                            | *  | *  | *  | *  | *  | *    | *  |  |
| 4535227       | 4536441 | yjhT   | *                            | *  | *  | *  | *  | *  | *    | *  |  |
| 4535990       | 4536716 | yjhA   |                              | *  | *  | *  | *  | *  | *    | *  |  |
| 4538162       | 4538765 | fimB   |                              | *  | *  | *  | *  | *  | *    | *  |  |
| 4539242       | 4539839 | fimE   |                              | *  | *  | *  | *  | *  | *    | *  |  |
| 4540320       | 4540869 | fimA   |                              | *  |    |    | *  | *  | *    | *  |  |
| 4540825       | 4541473 | fimI   |                              | *  | *  |    | *  | *  | *    | *  |  |
| 4541509       | 4542235 | fimC   | *                            | *  | *  | *  | *  | *  | *    | *  |  |
| 4542302       | 4544939 | fimD_2 | *                            | *  |    |    | *  | *  | *    | *  |  |
| 4544948       | 4545479 | fimF   |                              |    | *  | *  | *  |    |      |    |  |
| 4545491       | 4545995 | fimG   |                              |    | *  | *  |    |    |      |    |  |
| 4546014       | 4546917 | fimH   | *                            | *  |    |    |    |    |      |    |  |
| 4552695       | 4553526 | yjiC   | *                            | *  | *  | *  | *  |    |      |    |  |
| 4554189       | 4554591 | yjiD   |                              | *  | *  |    |    |    |      |    |  |
| 4558033       | 4558690 | yjiI   |                              | *  | *  |    |    |    |      |    |  |
| 4559948       | 4560920 | yjiK   | *                            | *  | *  |    |    |    |      |    |  |
| 4566927       | 4567487 | yjiQ   |                              |    | *  |    |    |    |      |    |  |
| 4568956       | 4569121 | b4341  |                              | *  |    |    |    |    |      |    |  |
| 4569571       | 4571137 | yjiT   | *                            | *  | *  | *  |    |    |      | *  |  |
| 4571340       | 4571670 | b4342  |                              | *  |    |    |    |    |      | *  |  |
| 4571704       | 4573245 | yjiU   | *                            |    |    |    |    |    |      | *  |  |
| 4571723       | 4572596 | yjiV   |                              | *  |    |    |    |    |      | *  |  |
| 4572799       | 4574062 | mcrD   |                              | *  |    |    |    | *  | *    | *  |  |
| 4574118       | 4575165 | mcrC   | *                            | *  | *  | *  | *  | *  | *    | *  |  |
| 4575164       | 4576562 | mcrB   | *                            | *  | *  | *  | *  | *  | *    | *  |  |
| 4576705       | 4577104 | yjiW   |                              | *  |    |    | *  | *  | *    | *  |  |
| 4577274       | 4578669 | hsdS   | *                            | *  | *  | *  | *  | *  | *    | *  |  |
| 4578665       | 4580255 | hsdM   |                              | *  |    |    |    |    |      |    |  |

| <i>E coli</i> |         | Gene | Ref | Ref | Ref | Ref | Ref | TW | TW   | TW |
|---------------|---------|------|-----|-----|-----|-----|-----|----|------|----|
| begin         | end     |      | 16  | 35  | 34  | 14  | 49  | 99 | 97.5 | 95 |
| 4580455       | 4584022 | hsdR |     |     | *   |     |     |    |      |    |
| 4584155       | 4585070 | mrr  |     | *   | *   |     |     |    |      |    |
| 4590568       | 4591147 | yjiZ |     |     | *   |     |     |    |      |    |
| 4591143       | 4591929 | yjjL |     |     | *   |     |     |    |      |    |
| 4592143       | 4592950 | yjjM |     | *   | *   | *   |     |    |      |    |
| 4593180       | 4594218 | yjjN |     |     | *   |     |     |    |      |    |
| 4598547       | 4599086 | dnaT | *   |     |     |     |     |    |      |    |
| 4598829       | 4599156 | yjjB |     |     | *   |     |     |    |      |    |
| 4599657       | 4600490 | yjjP |     | *   |     | *   |     |    |      |    |
| 4601046       | 4601771 | yjjQ |     | *   | *   | *   | *   |    |      |    |
| 4601365       | 4602043 | yjjR |     |     | *   | *   |     |    |      |    |
| 4612249       | 4613112 | yjjW |     | *   |     |     |     |    |      |    |
| 4618974       | 4620306 | yjjJ |     |     | *   |     |     |    |      |    |
| 4637608       | 4637749 | yjjY |     |     | *   | *   |     |    |      |    |
